# Supplementary material
Source: MDPI journal article supplement (https://www.mdpi.com/1424-8247/16/9/1316)
Supplement: s1 [file s1]

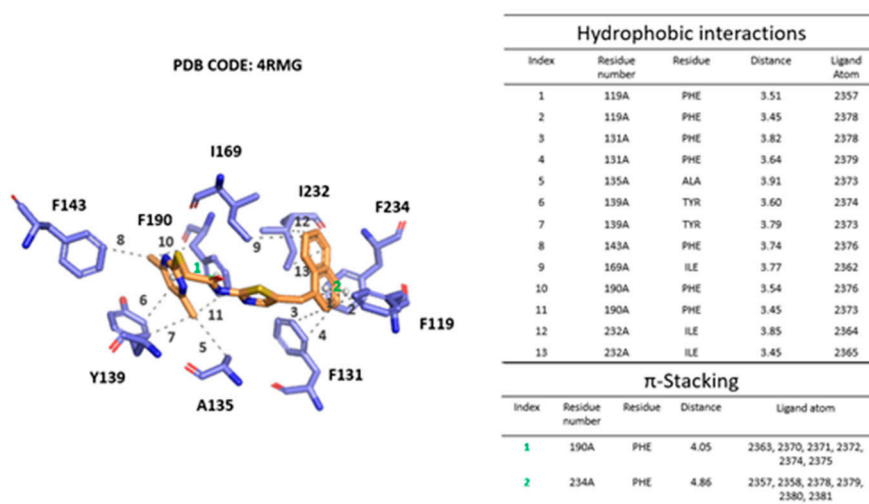

**Figure S1.** Scheme of the most relevant interactions involving the SIRT2 inhibitor SirReal2 (3TE) and the biological target (*PDB code* = 4RMG) [22]. Distance values are reported in Å. Hydrophobic interactions are represented as grey dotted lines, and indexed with dark grey numbers.  $\pi$ -Stacking are represented as dark green long-dash dotted lines, and indexed with green numbers. Hydrogen bonds are represented as blue solid lines, indexes with red numbers. Water bridges are indicated with light blue solid lines, indexes with blue numbers. The white spheres indicate the center of an aromatic ring (involved in pi-stacking).

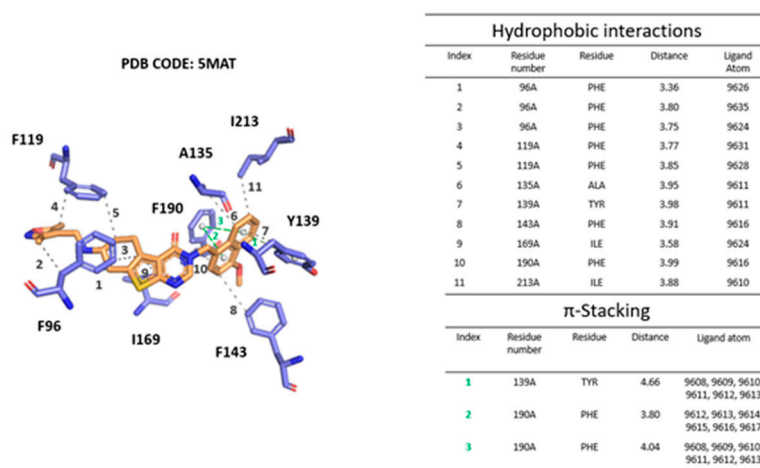

**Figure S2.** Scheme of the most relevant interactions involving the selective thienopyrimidinone based SIRT2 inhibitor (7KJ) and the biological target (*PDB code* = 5MAT) [25]. Distance values are reported in Å. Hydrophobic interactions are represented as grey dotted lines, and indexed with dark grey numbers.  $\pi$ -Stacking are represented as dark green long-dash dotted lines, and indexed with green numbers. Hydrogen bonds are represented as blue solid lines, indexes with red numbers. Water bridges are indicated with light blue solid lines, indexes with blue numbers. The white spheres indicate the center of an aromatic ring (involved in pi-stacking).

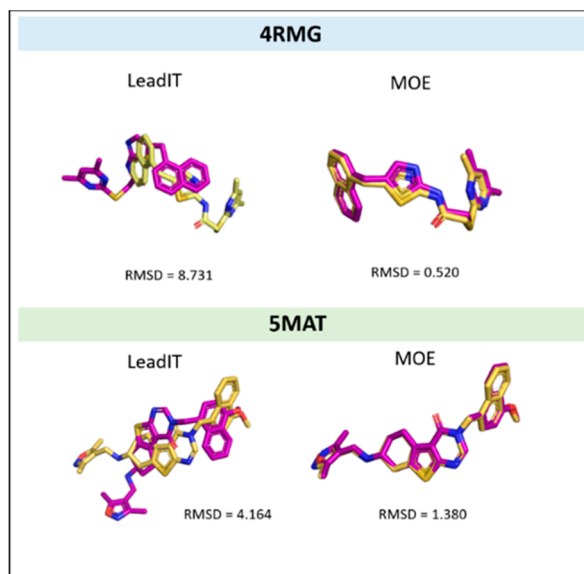

**Figure S3.** Comparison of the best scored 4RMG and 5MAT ligand docking poses (purple ligand) with respect to the same crystallized compounds at the corresponding 4RMG and 5MAT PDB codes (yellow ligand) as obtained by LeadIT and MOE molecular docking. RMSD values (Å) have been evaluated by Pymol [The PyMOL Molecular Graphics System, Version 1.2r3pre, Schrödinger, LLC].

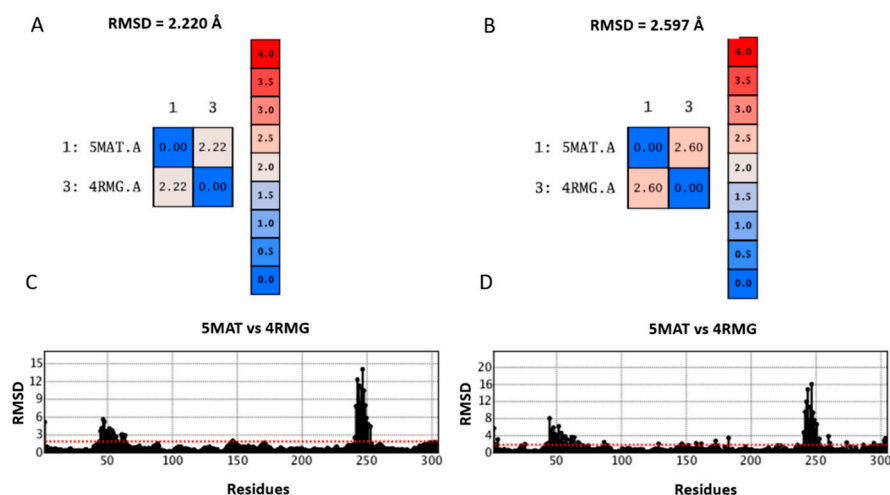

**Figure S4.** RMSD values (Å) as obtained by superimposition of 4RMG and 5MAT are shown based on the carbon atom alignment (A) and at the whole structure (B). The corresponding overall RMSD variation trend is also reported (C,D).

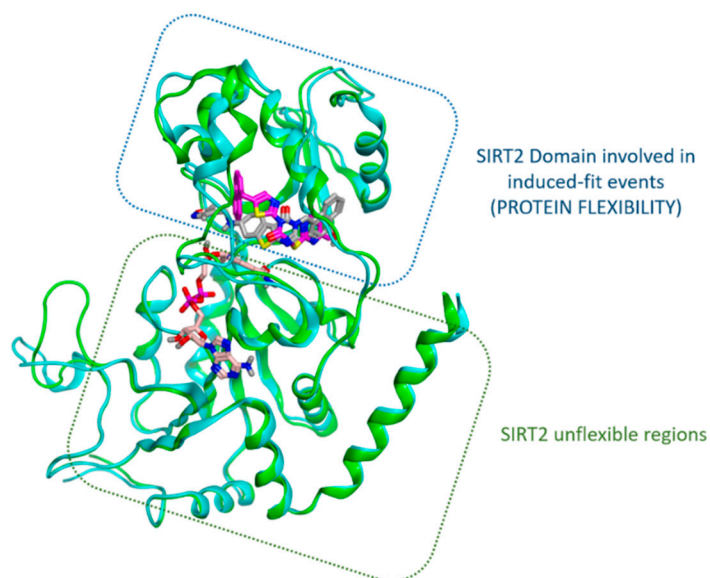

**Figure S5.** Superimposition of the 4RMG (in cyan) and 5MAT (in green) PDB codes in presence of the co-crystallized ligands is also depicted. Most flexible areas due to the inhibitor structure are also highlighted.

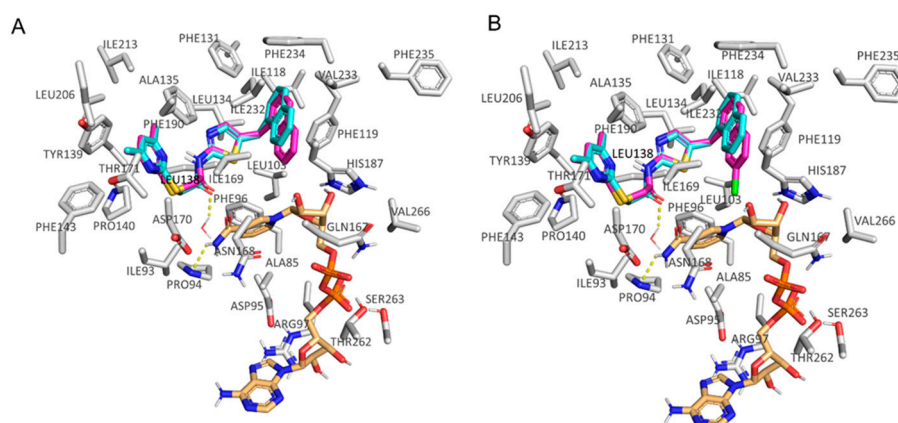

**Figure S6** Docking positioning of SirReal2 (C atom, magenta) (A) and of the analogue **11** (C atom; magenta) (B) at the 4RMG binding site. The co-crystallized SirReal2 (C atom; cyan) and NAD<sup>+</sup> (C atom; light orange) structures are also reported.

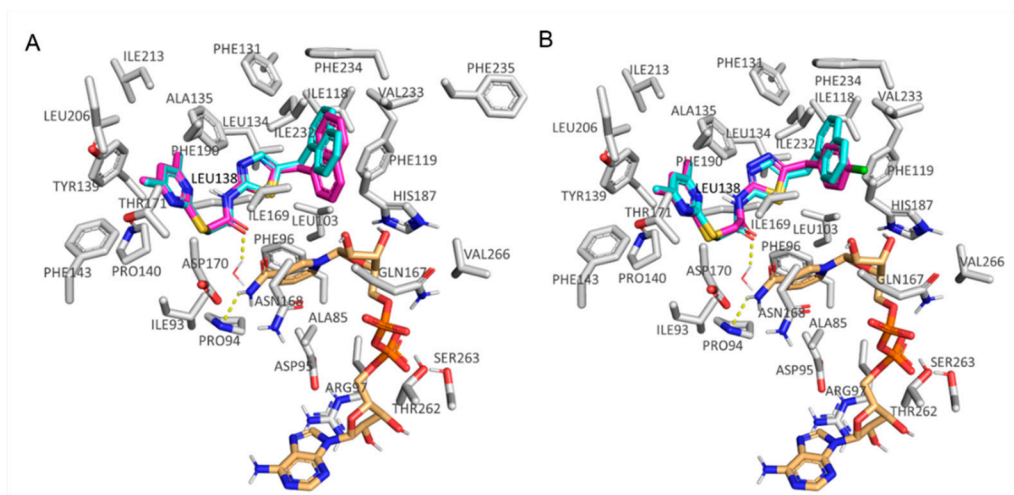

**Figure S7** Docking positioning of compound **25** (C atom, magenta) (A) and of **23** (C atom; magenta) (B) at the 4RMG binding site. The co-crystallized SirReal2 (C atom; cyan) and NAD<sup>+</sup> (C atom; light orange) structures are also reported.

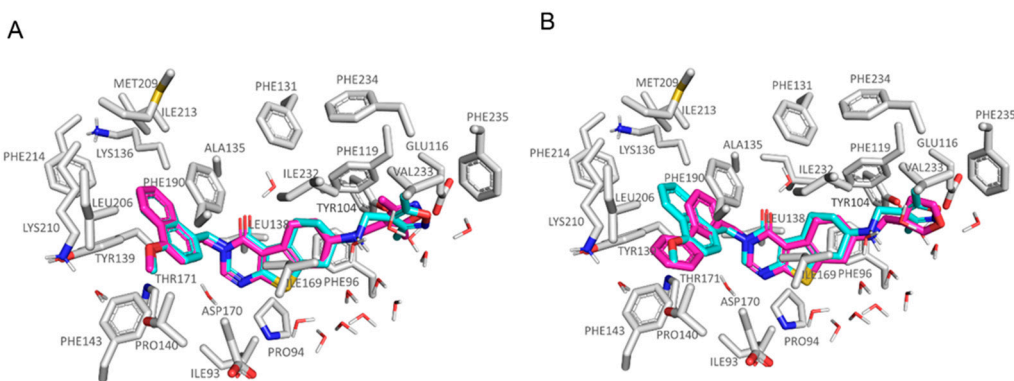

**Figure S8.** Docking positioning of compound **36** (C atom, magenta) (A) and of **94** (C atom; magenta) (B) at the 5MAT binding site. The co-crystallized thienopyrimidinone inhibitor **36** (C atom; cyan) structure is also reported.

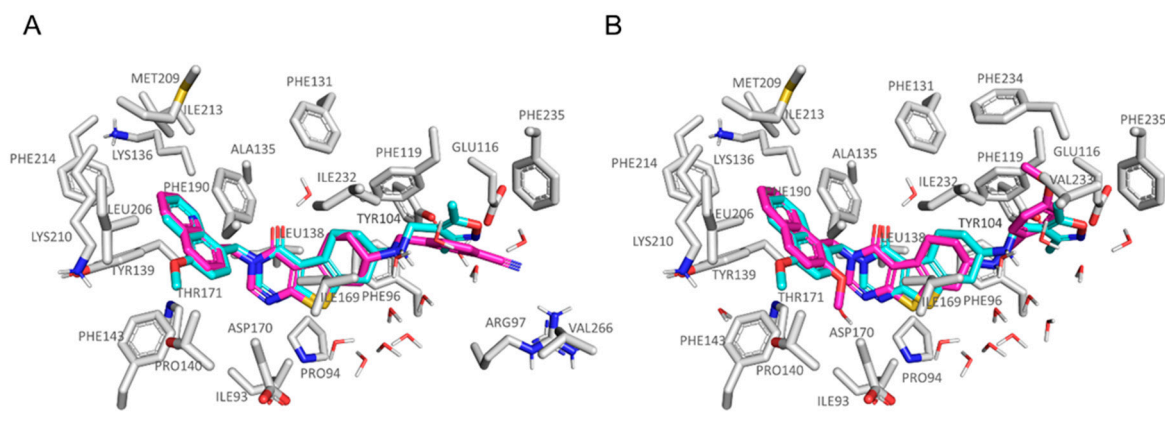

**Figure S9.** Docking positioning of compound **49** (C atom, magenta) (A) and of **56** (C atom; magenta) (B) at the 5MAT binding site. The co-crystallized thienopyrimidinone inhibitor **36** (C atom; cyan) structure is also reported.

A

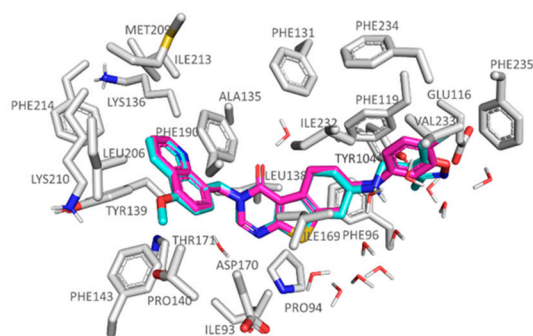

B

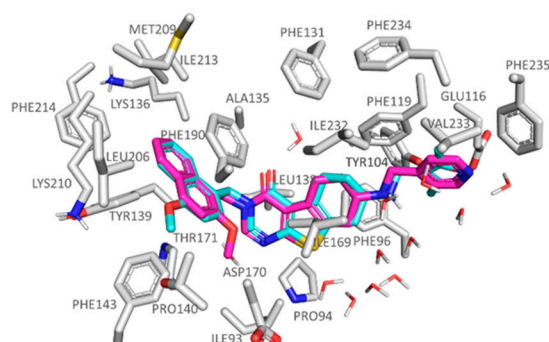

**Figure S10.** Docking positioning of compound **62** (C atom, magenta) (A) and of **66** (C atom; magenta) (B) at the 5MAT binding site. The co-crystallized thienopyrimidinone inhibitor **36** (C atom; cyan) structure is also reported.

A

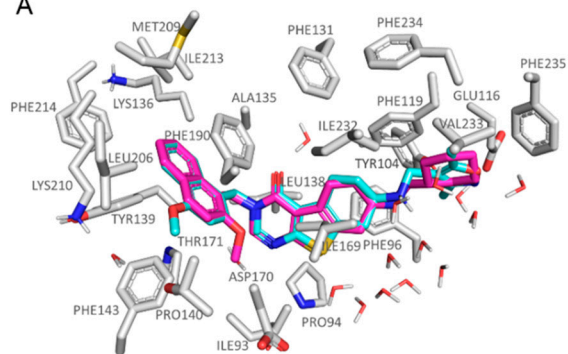

B

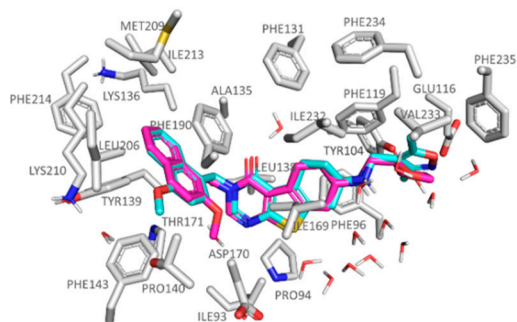

**Figure S11.** Docking positioning of compound **86** (C atom, magenta) (A) and of **90** (C atom; magenta) (B) at the 5MAT binding site. The co-crystallized thienopyrimidinone inhibitor **36** (C atom; cyan) structure is also reported.



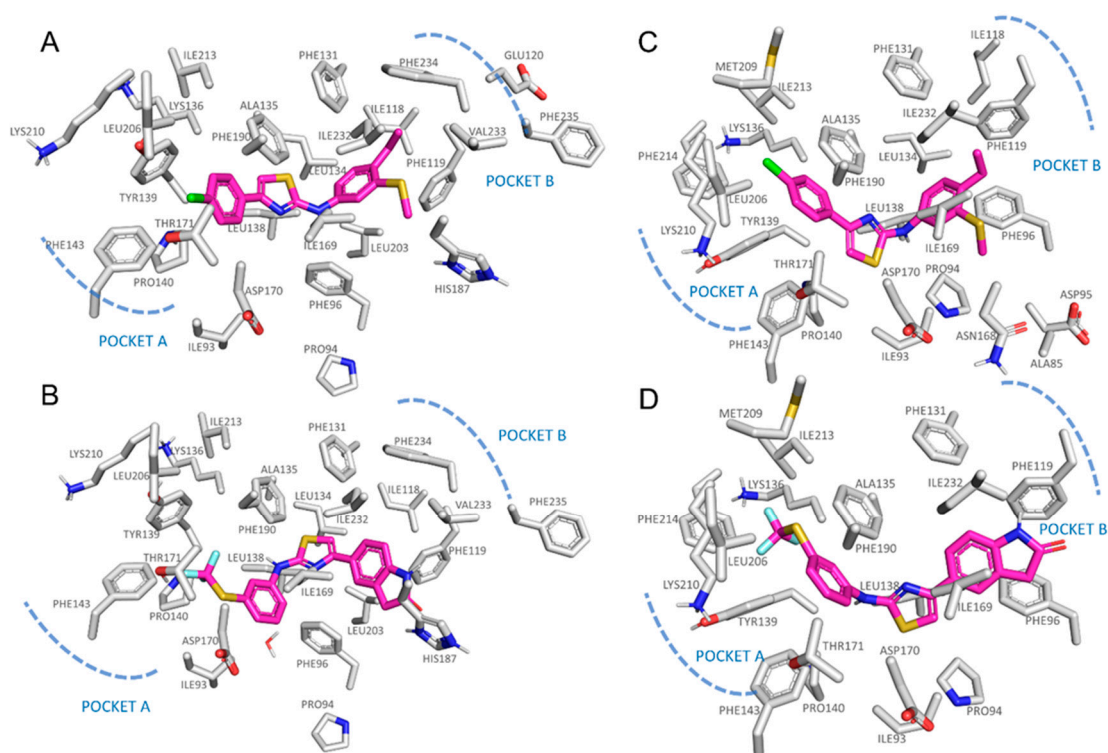

**Figure S12.** Docking positioning of compound **2a** (C atom, magenta) at the 4RMG (A) and at the 5MAT PDB code (C) binding site. The docking mode of the analogue **6a** (taken as representative of the most related analogues of YM-08 herein described) at the 4RMG (B) and at the 5MAT PDB code (D) binding site is also reported.

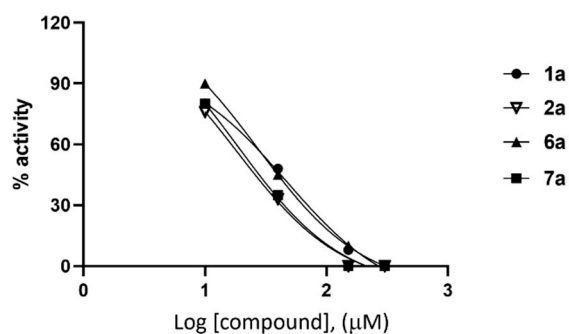

**Figure S13.** Concentration-response plots of the putative SIRT2 inhibitors, tested on SIRT2 recombinant protein. Data are plotted as % activity vs. inhibitor logarithmic micromolar concentration.

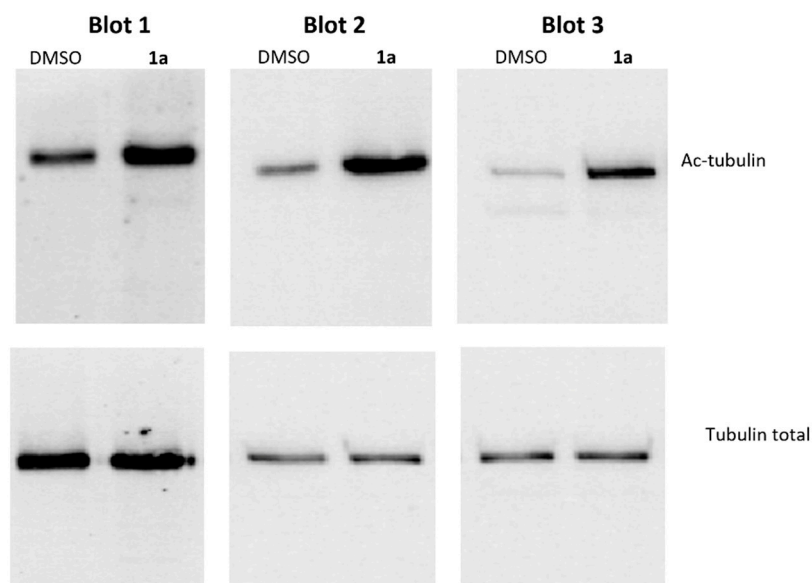

**Figure S14.** Compound **1a** increase  $\alpha$ -tubulin acetylation in cultured cells. Cells were incubated with 10  $\mu$ M compound **1a**, or the respective amount of vehicle DMSO, and used for protein lysate generation, and total and acetylated  $\alpha$ -tubulin levels were detected by Immunoblotting. The three performed Western blot analysis are shown.

**Table S1.** Chemical structure and SIRT2 inhibitory ability featured by compounds **1-26** (as SirReal2 analogues) [24].

| Compound             | Chemical Structure                                                                  | IC <sub>50</sub> (μM) |
|----------------------|-------------------------------------------------------------------------------------|-----------------------|
| <b>1</b>             | 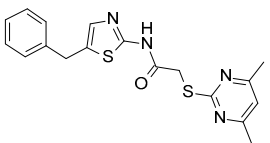   | 3.75                  |
| <b>2</b>             |    | 16.8                  |
| <b>3</b>             |    | 1.64                  |
| <b>4</b>             |    | 3.40                  |
| <b>5</b>             |   | 1.33                  |
| <b>6</b>             |  | 164.5                 |
| <b>7</b>             |  | 143                   |
| <b>8</b>             |  | 207                   |
| <b>9</b>             |  | 33                    |
| <b>10 (SirReal2)</b> |  | 0.44                  |
| <b>11</b>            |  | 0.18                  |
| <b>12</b>            |  | 9.77                  |
| <b>13</b>            |  | 0.26                  |



|    |                                                                                     |       |
|----|-------------------------------------------------------------------------------------|-------|
| 14 | 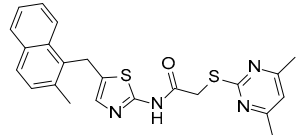   | 0.31  |
| 15 |    | 0.21  |
| 16 |    | 0.48  |
| 17 |    | 2.34  |
| 18 |    | 45.6  |
| 19 |   | 15.0  |
| 20 |  | 65    |
| 21 |  | 127.2 |
| 22 |  | 502.8 |
| 23 |  | 30.9  |
| 24 |  | 167.7 |
| 25 |  | 1.89  |
| 26 |  | 207   |

**Table S2.** Chemical structure and SIRT2 inhibitory ability featured by compounds 27-111 [25].

| Compound | Chemical Structure | IC <sub>50</sub> (μM) |
|----------|--------------------|-----------------------|
|----------|--------------------|-----------------------|

|    |                                                                                      |       |
|----|--------------------------------------------------------------------------------------|-------|
| 27 | 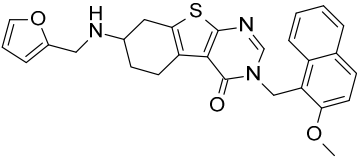    | 5.24  |
| 28 |     | 7.61  |
| 29 |     | 11.68 |
| 30 |     | 4.16  |
| 31 |     | 5.11  |
| 32 |    | 4.20  |
| 33 |  | 7.43  |
| 34 |   | 4.00  |
| 35 |   | 1.85  |
| 36 |   | 0.58  |
| 37 |   | 6.94  |
| 38 |   | 6.03  |

|    |                                                                                      |       |
|----|--------------------------------------------------------------------------------------|-------|
| 39 | 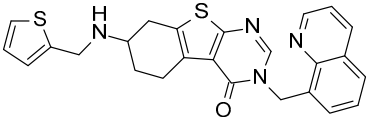    | 2.56  |
| 40 |     | 21.10 |
| 41 |    | 5.45  |
| 42 |     | 2.50  |
| 43 |     | 10.42 |
| 44 |    | 4.07  |
| 45 |   | 1.72  |
| 46 |  | 2.84  |
| 47 |  | 1.27  |
| 48 |   | 3.80  |
| 49 |  | 0.39  |
| 50 |   | 2.24  |

|    |                                                                                      |       |
|----|--------------------------------------------------------------------------------------|-------|
| 51 | 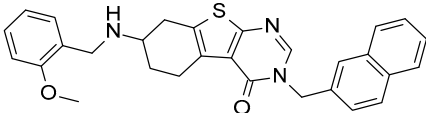   | 4.22  |
| 52 |     | 5.61  |
| 53 |     | 9.59  |
| 54 |     | 1.90  |
| 55 |     | 13.40 |
| 56 |  | 0.65  |
| 57 |  | 3.2   |
| 58 |  | 3.82  |
| 59 |  | 1.83  |
| 60 |   | 2.48  |
| 61 |   | 4.25  |
| 62 |   | 0.97  |

|    |                                                                                      |      |
|----|--------------------------------------------------------------------------------------|------|
| 63 | 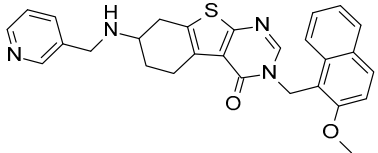    | 1.45 |
| 64 |    | 2.99 |
| 65 |    | 2.92 |
| 66 |    | 1.20 |
| 67 |    | 3.58 |
| 68 |  | 3.14 |
| 69 |   | 3.68 |
| 70 |   | 3.12 |
| 71 |   | 7.68 |
| 72 |  | 8.67 |
| 73 |   | 2.61 |
| 74 |  | 1.9  |

|    |                                                                                      |       |
|----|--------------------------------------------------------------------------------------|-------|
| 75 | 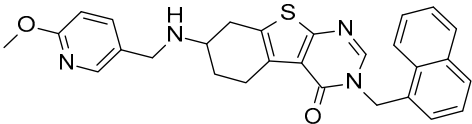   | 7.59  |
| 76 |    | 10.17 |
| 77 |    | 2.65  |
| 78 |     | 10.31 |
| 79 |     | 9.57  |
| 80 |    | 8.68  |
| 81 |   | 2.75  |
| 82 |   | 5.79  |
| 83 |  | 9.60  |
| 84 |   | 6.45  |
| 85 |  | 5.30  |
| 86 |   | 1.65  |

|    |                                                                                     |       |
|----|-------------------------------------------------------------------------------------|-------|
| 87 | 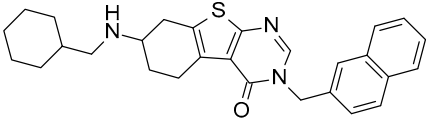  | 5.53  |
| 88 |    | 2.43  |
| 89 |    | 9.18  |
| 90 |    | 1.90  |
| 91 |    | 12.48 |
| 92 |  | 13.14 |
| 93 |  | 6.03  |
| 94 |  | 2.58  |
| 95 |  | 5.85  |
| 96 |  | 3.74  |
| 97 |  | 1.18  |



|     |                                                                                      |       |
|-----|--------------------------------------------------------------------------------------|-------|
| 98  | 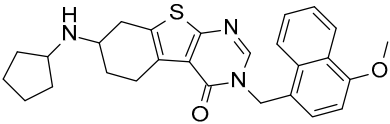   | 0.73  |
| 99  |    | 1.52  |
| 100 |     | 1.11  |
| 101 |    | 5.06  |
| 102 |     | 1.74  |
| 103 |   | 3.14  |
| 104 |   | 3.78  |
| 105 |   | 3.09  |
| 106 |   | 16.32 |
| 107 |   | 5.49  |
| 108 |  | 3.36  |

|     |                                                                                    |      |
|-----|------------------------------------------------------------------------------------|------|
| 109 | 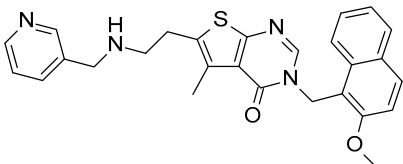  | 2.15 |
| 110 |  | 2.93 |
| 111 |   | 8.15 |

**Table S3.** Chemical structure and SIRT2 inhibitory ability featured by compounds **112-116** ([26].

| Compound | Chemical Structure                                                                  | IC <sub>50</sub> (μM) |
|----------|-------------------------------------------------------------------------------------|-----------------------|
| 112      | 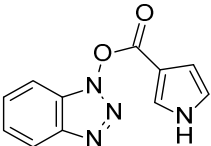  | 56.6                  |
| 113      |  | 42.7                  |
| 114      |  | 14.3                  |
| 115      |  | 74.0                  |
| 116      |  | 77.1                  |

**Table S4.** Five top scored re-docking positioning of the 4RMG and 5MAT co-crystallized ligands at the corresponding experimental data, based on the LeadIT and MOE software (see material and method section for details). The predicted ΔG value of each protein-ligand complex has been reported.

|  |                   |                |
|--|-------------------|----------------|
|  | LeadIT re-docking | MOE re-docking |
|--|-------------------|----------------|

| <b>SIRT2 co-crystallized inhibitor</b> | <b>4RMG Binding Affinity Energy (kJ/mol)</b> | <b>5MAT Binding Affinity Energy (kJ/mol)</b> | <b>4RMG Binding Affinity Energy (kcal/mol)</b> | <b>5MAT Binding Affinity Energy (kcal/mol)</b> |
|----------------------------------------|----------------------------------------------|----------------------------------------------|------------------------------------------------|------------------------------------------------|
| 4RMG ligand pose 1                     | -25.9191                                     | -                                            | -10,3013                                       | -                                              |
| 4RMG ligand pose 2                     | -25.7311                                     | -                                            | -9,94133                                       | -                                              |
| 4RMG ligand pose 3                     | -24.9027                                     | -                                            | -9,62434                                       | -                                              |
| 4RMG ligand pose 4                     | -24.8213                                     | -                                            | -9,55069                                       | -                                              |
| 4RMG ligand pose 5                     | -24.2870                                     | -                                            | -9,52854                                       | -                                              |
| 5MAT ligand pose 1                     | -                                            | -26.1502                                     | -                                              | -13,602593                                     |
| 5MAT ligand pose 2                     | -                                            | -24.6139                                     | -                                              | -13,588899                                     |
| 5MAT ligand pose 3                     | -                                            | -22.7001                                     | -                                              | -13,042794                                     |
| 5MAT ligand pose 4                     | -                                            | -21.7195                                     | -                                              | -12,688121                                     |
| 5MAT ligand pose 5                     | -                                            | -21.6132                                     | -                                              | -12,586191                                     |

**Table S5.** Ten top scored docking positioning of SirReal2 (**10**) and of the related analogues (**1-26**) at the 4RMG PDB code (MOE software). The predicted  $\Delta G$  value of each protein-ligand complex has been reported, as calculated in terms of final scoring function (S, as Kcal/mol).

| <b>Compound</b> | <b>S</b> | <b>E_conf</b> | <b>E_place</b> | <b>E_score1</b> | <b>E_refine</b> | <b>E_score2</b> |
|-----------------|----------|---------------|----------------|-----------------|-----------------|-----------------|
| <b>1</b>        | -9.6736  | -33.1359      | -22.7067       | -8.4093         | -8.3120         | -9.6736         |
| <b>1</b>        | -9.0728  | -47.8155      | -23.2848       | -9.8777         | -26.1328        | -9.0728         |
| <b>1</b>        | -8.9807  | -44.9250      | -33.6730       | -10.8258        | -23.7357        | -8.9807         |
| <b>1</b>        | -8.9344  | -41.2470      | -28.1481       | -7.9972         | -23.2107        | -8.9344         |
| <b>1</b>        | -8.6167  | -48.5433      | -27.4762       | -7.8290         | -29.6131        | -8.6167         |
| <b>1</b>        | -7.9467  | -42.3455      | -25.6510       | -9.6144         | -5.7398         | -7.9467         |
| <b>1</b>        | -7.8165  | -48.3387      | -18.7807       | -9.1360         | -19.5343        | -7.8165         |
| <b>1</b>        | -7.7813  | -39.4436      | -18.4346       | -8.5048         | -13.8324        | -7.7813         |
| <b>1</b>        | -7.3651  | -49.1032      | -20.0311       | -8.1013         | -15.2034        | -7.3651         |
| <b>1</b>        | -7.2839  | -47.3109      | -21.0416       | -8.2842         | -16.6757        | -7.2839         |
| <b>2</b>        | -8.1144  | -50.7917      | -25.3729       | -9.3513         | -26.1691        | -8.1144         |
| <b>2</b>        | -8.0771  | -39.1846      | -19.6832       | -9.5829         | -7.5630         | -8.0771         |
| <b>2</b>        | -7.4749  | -51.0584      | -17.8084       | -8.7937         | -29.0829        | -7.4749         |
| <b>2</b>        | -7.4748  | -51.0620      | -32.6211       | -8.6946         | -29.0796        | -7.4748         |
| <b>2</b>        | -7.3055  | -47.1204      | -18.6753       | -8.4466         | -17.7960        | -7.3055         |
| <b>2</b>        | -7.1458  | -43.6664      | -22.3148       | -8.8797         | -13.1793        | -7.1458         |
| <b>2</b>        | -7.0571  | -50.5811      | -21.4530       | -8.5875         | -17.2021        | -7.0571         |

|   |          |          |          |          |          |          |
|---|----------|----------|----------|----------|----------|----------|
| 2 | -6.9682  | -48.3567 | -33.7238 | -11.2191 | -12.2058 | -6.9682  |
| 2 | -6.9432  | -45.4379 | -22.9673 | -9.5667  | -3.6194  | -6.9432  |
| 2 | -6.9389  | -45.7644 | -21.3027 | -9.6643  | -14.8018 | -6.9389  |
| 3 | -10.5878 | -18.9457 | -31.4863 | -10.1438 | 7.0218   | -10.5878 |
| 3 | -9.5626  | -42.2045 | -20.2995 | -8.6613  | -19.2315 | -9.5626  |
| 3 | -9.3506  | -38.9212 | -17.5137 | -8.2308  | -24.7261 | -9.3506  |
| 3 | -9.3231  | -42.5655 | -26.5405 | -9.0895  | -25.1933 | -9.3231  |
| 3 | -9.0031  | -45.2524 | -38.7712 | -11.1381 | -28.2734 | -9.0031  |
| 3 | -8.8932  | -38.5696 | -30.9905 | -9.4520  | -11.4654 | -8.8932  |
| 3 | -8.4852  | -32.0124 | -21.0520 | -7.9074  | -2.9656  | -8.4852  |
| 3 | -7.9748  | -49.6609 | -24.3158 | -8.8533  | -20.5586 | -7.9748  |
| 3 | -7.7630  | -45.5956 | -24.9819 | -9.4224  | -17.9371 | -7.7630  |
| 3 | -7.6503  | -29.1979 | -25.3221 | -8.5440  | -3.4975  | -7.6503  |
| 4 | -9.6325  | -39.6040 | -30.8450 | -9.4190  | -18.6845 | -9.6325  |
| 4 | -8.8963  | -38.9960 | -29.0621 | -8.7822  | -22.9874 | -8.8963  |
| 4 | -8.2922  | -33.7673 | -22.1036 | -9.7895  | 13.6997  | -8.2922  |
| 4 | -8.2484  | -45.4510 | -24.6903 | -8.9422  | -12.4736 | -8.2484  |
| 4 | -8.2292  | -53.1790 | -24.0905 | -9.8634  | -17.0082 | -8.2292  |
| 4 | -8.2195  | -37.3738 | -19.3905 | -8.6728  | -17.8328 | -8.2195  |
| 4 | -8.1213  | -45.5405 | -27.4410 | -9.0916  | -8.7742  | -8.1213  |
| 4 | -8.0147  | -51.0825 | -24.6135 | -9.6065  | -13.9583 | -8.0147  |
| 4 | -8.0053  | -42.8437 | -23.6788 | -9.1258  | -4.9787  | -8.0053  |
| 4 | -7.8601  | -44.9619 | -29.9113 | -9.6261  | -14.8783 | -7.8601  |
| 5 | -8.9024  | 6.7965   | -21.2115 | -8.9830  | 6.9895   | -8.9024  |
| 5 | -8.6758  | -36.1406 | -31.6933 | -8.8887  | -15.4207 | -8.6758  |
| 5 | -7.7182  | -35.3433 | -21.9398 | -8.5505  | -14.9504 | -7.7182  |
| 5 | -7.7043  | -43.6640 | -24.9165 | -8.8838  | -18.8552 | -7.7043  |
| 5 | -7.6287  | -40.6700 | -19.4641 | -7.9739  | -13.8240 | -7.6287  |
| 5 | -7.5847  | -38.9270 | -25.1764 | -8.7668  | -25.6075 | -7.5847  |
| 5 | -7.1810  | -38.1658 | -25.1428 | -8.2855  | -25.1012 | -7.1810  |
| 5 | -7.1136  | -38.9045 | -25.9766 | -9.9756  | -16.3470 | -7.1136  |
| 5 | -7.1081  | -47.6091 | -25.5370 | -8.9308  | -15.3825 | -7.1081  |
| 5 | -6.8486  | -43.6880 | -15.8370 | -8.5546  | -22.7091 | -6.8486  |
| 6 | -10.2206 | -18.3512 | -20.8563 | -8.0137  | -29.2764 | -10.2206 |
| 6 | -10.1788 | -14.6657 | -19.3076 | -8.8039  | -25.0414 | -10.1788 |
| 6 | -10.1258 | -27.5984 | -19.4824 | -8.3457  | -20.2695 | -10.1258 |
| 6 | -10.1151 | -20.2532 | -23.2904 | -7.7866  | -27.3793 | -10.1151 |
| 6 | -9.9975  | -7.3810  | -16.8774 | -9.4954  | 51.6183  | -9.9975  |
| 6 | -9.5889  | -17.8983 | -20.4954 | -7.9549  | -20.1281 | -9.5889  |
| 6 | -9.4249  | -19.6337 | -23.0076 | -8.3819  | -19.3121 | -9.4249  |
| 6 | -9.3384  | -2.3643  | -24.5323 | -9.1810  | -11.1050 | -9.3384  |
| 6 | -9.2658  | -17.5509 | -23.8552 | -11.6104 | -14.9267 | -9.2658  |
| 6 | -9.1761  | -14.7681 | -24.0717 | -7.6903  | -17.0571 | -9.1761  |
| 7 | -10.6856 | 17.3195  | -27.4333 | -8.9435  | -18.4120 | -10.6856 |
| 7 | -10.6822 | 34.8136  | -23.6160 | -8.6588  | 10.1869  | -10.6822 |
| 7 | -10.5591 | 21.4632  | -36.2113 | -8.8634  | -14.0017 | -10.5591 |

|    |          |          |          |          |          |          |
|----|----------|----------|----------|----------|----------|----------|
| 7  | -10.3860 | 28.1219  | -22.6676 | -8.7134  | 9.1169   | -10.3860 |
| 7  | -10.2416 | 14.3181  | -32.8900 | -9.6292  | -4.3309  | -10.2416 |
| 7  | -10.1546 | 24.4966  | -36.0244 | -11.1829 | -13.7041 | -10.1546 |
| 7  | -10.0031 | 17.4580  | -33.5266 | -8.8884  | 8.2728   | -10.0031 |
| 7  | -9.9702  | 16.7595  | -28.3186 | -9.1978  | -14.5834 | -9.9702  |
| 7  | -9.6948  | 9.7073   | -19.7065 | -9.4492  | -16.3879 | -9.6948  |
| 7  | -9.3994  | 20.0443  | -27.0758 | -9.0775  | -23.4827 | -9.3994  |
| 8  | -11.7580 | 40.0966  | -29.1720 | -7.8238  | -1.2025  | -11.7580 |
| 8  | -11.6980 | 42.5667  | -31.3180 | -7.8524  | -13.9896 | -11.6980 |
| 8  | -11.5612 | 41.7446  | -28.0426 | -9.0847  | -6.9450  | -11.5612 |
| 8  | -10.9653 | 38.1951  | -32.7198 | -8.4754  | -14.6462 | -10.9653 |
| 8  | -10.4682 | 41.3565  | -26.8452 | -8.1665  | -15.6221 | -10.4682 |
| 8  | -10.3436 | 41.5951  | -28.2643 | -9.8387  | 3.7742   | -10.3436 |
| 8  | -10.2528 | 37.3372  | -27.3794 | -9.1686  | -8.8902  | -10.2528 |
| 8  | -10.0720 | 59.8457  | -28.9742 | -7.6376  | 17.5465  | -10.0720 |
| 8  | -9.9405  | 42.9009  | -14.2820 | -8.5186  | -21.5935 | -9.9405  |
| 8  | -9.5348  | 49.6718  | -24.1953 | -8.9034  | 13.8869  | -9.5348  |
| 9  | -8.2959  | -51.1083 | -17.5034 | -7.6183  | -21.9051 | -8.2959  |
| 9  | -8.2330  | -44.7898 | -15.3641 | -7.4359  | -3.5915  | -8.2330  |
| 9  | -8.2169  | -39.4007 | -20.7057 | -10.2535 | -6.6024  | -8.2169  |
| 9  | -8.1991  | -57.5728 | -13.9010 | -9.7210  | -15.5623 | -8.1991  |
| 9  | -8.1117  | -52.1246 | -21.2162 | -7.5788  | -25.9125 | -8.1117  |
| 9  | -7.8609  | -54.2362 | -17.8920 | -9.9149  | -24.2803 | -7.8609  |
| 9  | -7.8525  | -47.1343 | -23.1347 | -7.8417  | -21.8377 | -7.8525  |
| 9  | -7.8255  | -54.9607 | -28.4475 | -10.5584 | -28.8390 | -7.8255  |
| 9  | -7.7479  | -53.5500 | -18.6650 | -9.8284  | 7.0213   | -7.7479  |
| 9  | -7.4265  | -50.0922 | -20.2700 | -7.4052  | -22.1531 | -7.4265  |
| 10 | -10.3013 | -24.7614 | -34.0070 | -9.0498  | -25.9820 | -10.3013 |
| 10 | -9.9413  | -30.5955 | -27.3615 | -9.0646  | -9.6791  | -9.9413  |
| 10 | -9.6243  | -32.5099 | -23.1356 | -9.6876  | -24.2546 | -9.6243  |
| 10 | -9.5507  | -24.9688 | -35.1714 | -8.2626  | -8.1118  | -9.5507  |
| 10 | -9.5285  | -28.3704 | -27.7602 | -9.4189  | -24.8285 | -9.5285  |
| 10 | -9.3648  | -18.8765 | -25.0676 | -7.7735  | -7.3949  | -9.3648  |
| 10 | -9.1062  | -26.4878 | -20.6396 | -7.5317  | -17.7843 | -9.1062  |
| 10 | -8.8971  | -33.5893 | -31.8139 | -8.7369  | -3.9934  | -8.8971  |
| 10 | -8.7971  | -27.0707 | -30.9790 | -8.4944  | -8.3836  | -8.7971  |
| 10 | -8.6063  | -28.5688 | -22.6237 | -9.0123  | -2.4891  | -8.6063  |
| 11 | -10.6562 | -28.6143 | -30.2226 | -10.0730 | -27.0208 | -10.6562 |
| 11 | -10.4639 | -32.6675 | -34.6832 | -8.2885  | -25.0037 | -10.4639 |
| 11 | -10.3029 | -21.6914 | -16.9705 | -7.7928  | -17.4857 | -10.3029 |
| 11 | -10.1306 | -33.2248 | -24.6398 | -7.9922  | -25.0305 | -10.1306 |
| 11 | -9.6599  | -36.0355 | -24.0793 | -8.0476  | -12.0786 | -9.6599  |
| 11 | -9.6021  | -26.2137 | -28.9337 | -10.1389 | -10.5818 | -9.6021  |
| 11 | -9.3068  | -29.2502 | -28.9363 | -8.0988  | 22.9821  | -9.3068  |
| 11 | -9.2230  | -10.1949 | -22.7890 | -8.5630  | 34.6320  | -9.2230  |
| 11 | -8.8541  | -23.0532 | -33.5683 | -8.6387  | 10.6831  | -8.8541  |

|    |          |          |          |          |          |          |
|----|----------|----------|----------|----------|----------|----------|
| 11 | -8.6680  | -4.6168  | -18.9917 | -7.9516  | 46.3885  | -8.6680  |
| 12 | -10.4594 | -20.3199 | -29.2042 | -7.5386  | -16.1867 | -10.4594 |
| 12 | -10.2066 | -23.6985 | -18.6446 | -7.4939  | -23.7270 | -10.2066 |
| 12 | -10.1864 | -14.3867 | -33.4577 | -8.2143  | -15.5228 | -10.1864 |
| 12 | -10.1074 | 5.0938   | -30.5640 | -8.6197  | -16.7069 | -10.1074 |
| 12 | -9.9647  | -20.5903 | -42.4968 | -10.2617 | -15.0006 | -9.9647  |
| 12 | -9.6585  | -8.4244  | -38.5863 | -7.5063  | 7.8775   | -9.6585  |
| 12 | -9.5658  | 6.0184   | -25.9751 | -9.1940  | 4.5910   | -9.5658  |
| 12 | -9.2844  | -2.6998  | -25.6502 | -7.7236  | 10.8821  | -9.2844  |
| 12 | -9.2085  | -14.7410 | -29.3802 | -9.5225  | 8.3429   | -9.2085  |
| 12 | -9.1918  | -7.4412  | -38.2670 | -9.2751  | -0.6775  | -9.1918  |
| 13 | -10.2202 | -4.9189  | -30.9119 | -7.5871  | -7.2494  | -10.2202 |
| 13 | -9.3077  | -6.8987  | -23.2635 | -7.0652  | 13.2543  | -9.3077  |
| 13 | -9.2865  | -15.4676 | -22.0314 | -7.0299  | -8.6863  | -9.2865  |
| 13 | -9.1559  | -6.8228  | -27.6958 | -7.1761  | 13.0956  | -9.1559  |
| 13 | -9.1208  | -10.8410 | -30.6928 | -8.3212  | -23.0170 | -9.1208  |
| 13 | -9.0966  | -12.1160 | -27.5214 | -6.8693  | 6.5325   | -9.0966  |
| 13 | -8.7387  | -20.5482 | -18.4107 | -7.0563  | -17.3811 | -8.7387  |
| 13 | -8.6515  | -9.4790  | -38.0645 | -8.9112  | -5.0422  | -8.6515  |
| 13 | -8.5797  | -1.5751  | -22.5957 | -8.9429  | 11.9075  | -8.5797  |
| 13 | -8.4716  | -12.0293 | -12.9102 | -6.8801  | 70.4553  | -8.4716  |
| 14 | -10.9063 | -26.4287 | -23.8714 | -8.2233  | -28.9128 | -10.9063 |
| 14 | -10.7691 | -17.6250 | -31.2709 | -10.0769 | -24.6988 | -10.7691 |
| 14 | -10.6037 | -15.7013 | -34.5166 | -10.0945 | -25.2533 | -10.6037 |
| 14 | -10.5381 | -13.1540 | -36.5153 | -11.1021 | -18.3544 | -10.5381 |
| 14 | -10.3331 | -19.0223 | -45.5135 | -8.8616  | -10.1119 | -10.3331 |
| 14 | -10.0489 | -23.5580 | -31.9473 | -10.9461 | -7.1689  | -10.0489 |
| 14 | -9.8798  | -13.3115 | -30.7720 | -9.6762  | -11.8429 | -9.8798  |
| 14 | -9.6127  | -18.0083 | -34.3563 | -7.8220  | -12.8450 | -9.6127  |
| 14 | -9.5808  | -15.6977 | -27.5591 | -9.4734  | -18.5116 | -9.5808  |
| 14 | -9.5779  | -18.1302 | -29.9098 | -7.2881  | -16.4635 | -9.5779  |
| 15 | -10.9934 | -31.4326 | -35.4511 | -8.8395  | -23.6716 | -10.9934 |
| 15 | -10.6488 | -27.4007 | -32.7834 | -8.0095  | -27.4353 | -10.6488 |
| 15 | -10.0166 | -26.9978 | -25.3344 | -9.0240  | 26.9721  | -10.0166 |
| 15 | -9.9849  | -27.5636 | -28.3650 | -12.2052 | -16.1783 | -9.9849  |
| 15 | -9.9638  | -16.6293 | -30.1041 | -7.5196  | -19.0977 | -9.9638  |
| 15 | -9.7594  | -29.4214 | -22.8583 | -7.2011  | -17.4539 | -9.7594  |
| 15 | -9.4975  | -23.1519 | -28.0405 | -10.2808 | -3.8178  | -9.4975  |
| 15 | -9.3298  | -28.7265 | -31.8064 | -7.0323  | 0.0171   | -9.3298  |
| 15 | -9.0968  | -16.9413 | -32.0815 | -8.8226  | 12.2085  | -9.0968  |
| 15 | -9.0501  | -13.6634 | -25.6612 | -8.1658  | 40.9827  | -9.0501  |
| 16 | -10.6166 | -25.9804 | -37.6326 | -9.0688  | -12.3348 | -10.6166 |
| 16 | -10.1895 | -33.9157 | -38.8749 | -9.7439  | -33.1806 | -10.1895 |
| 16 | -9.9181  | -24.0170 | -30.0355 | -8.0552  | -18.1332 | -9.9181  |
| 16 | -9.4597  | -27.6432 | -26.4770 | -7.9959  | -22.0286 | -9.4597  |
| 16 | -9.4071  | -21.7246 | -23.3507 | -8.5213  | 6.5402   | -9.4071  |

|    |          |          |          |          |          |          |
|----|----------|----------|----------|----------|----------|----------|
| 16 | -9.3512  | -15.3919 | -16.8763 | -8.4363  | -13.6957 | -9.3512  |
| 16 | -9.2732  | -20.0033 | -22.0248 | -8.1488  | -13.4452 | -9.2732  |
| 16 | -9.0266  | -32.3940 | -20.4978 | -8.0440  | -19.4790 | -9.0266  |
| 16 | -8.8986  | -29.4664 | -20.0783 | -8.3610  | -20.4193 | -8.8986  |
| 16 | -8.8841  | -17.0353 | -29.4641 | -8.4029  | 13.5789  | -8.8841  |
| 17 | -9.1257  | -34.3286 | -25.1491 | -8.5305  | -11.0866 | -9.1257  |
| 17 | -9.0535  | -32.0351 | -38.1564 | -11.2084 | -25.2556 | -9.0535  |
| 17 | -8.9872  | -35.3704 | -26.4558 | -10.7152 | -21.7535 | -8.9872  |
| 17 | -8.8453  | -35.0594 | -34.8193 | -9.1521  | -31.2273 | -8.8453  |
| 17 | -8.8197  | -25.2356 | -35.4336 | -9.2441  | -20.6142 | -8.8197  |
| 17 | -8.7712  | -29.3959 | -29.5622 | -9.3473  | -14.1821 | -8.7712  |
| 17 | -8.7319  | -15.5646 | -29.5904 | -10.1696 | -0.7843  | -8.7319  |
| 17 | -8.6685  | -28.9091 | -39.3241 | -10.0620 | 16.0342  | -8.6685  |
| 17 | -8.4218  | -35.4225 | -27.6388 | -9.1644  | -14.6738 | -8.4218  |
| 17 | -8.3903  | -29.5489 | -23.4110 | -9.1690  | -25.7979 | -8.3903  |
| 18 | -10.9132 | -28.8382 | -29.2158 | -9.0911  | -23.4994 | -10.9132 |
| 18 | -10.7645 | 18.6252  | -29.5605 | -9.5664  | 40.6146  | -10.7645 |
| 18 | -10.7488 | -15.5522 | -36.4968 | -8.7999  | 4.2133   | -10.7488 |
| 18 | -10.3054 | -31.6483 | -16.6813 | -7.0013  | -9.1165  | -10.3054 |
| 18 | -10.2512 | -31.4450 | -31.6273 | -8.0424  | -10.4274 | -10.2512 |
| 18 | -10.0207 | -29.2022 | -21.0523 | -7.8890  | -17.7643 | -10.0207 |
| 18 | -9.7634  | -25.7046 | -20.5480 | -8.4192  | -18.0784 | -9.7634  |
| 18 | -9.6922  | -24.0033 | -20.8684 | -8.0622  | -4.4832  | -9.6922  |
| 18 | -9.6305  | -20.5643 | -27.1845 | -8.6961  | -8.8487  | -9.6305  |
| 18 | -9.5857  | -28.5568 | -23.2858 | -7.4273  | -7.0697  | -9.5857  |
| 19 | -10.5465 | -21.4047 | -19.6544 | -7.3632  | -24.8632 | -10.5465 |
| 19 | -10.3235 | -15.3884 | -24.6740 | -9.1857  | -11.7835 | -10.3235 |
| 19 | -10.3089 | -19.0376 | -38.2177 | -7.2021  | -8.0437  | -10.3089 |
| 19 | -10.0874 | -26.4603 | -24.7009 | -9.7398  | -24.5458 | -10.0874 |
| 19 | -10.0660 | -22.2702 | -31.1315 | -7.5225  | -16.6384 | -10.0660 |
| 19 | -9.5875  | -18.0126 | -28.1411 | -12.1383 | -9.5315  | -9.5875  |
| 19 | -9.4035  | -11.7819 | -24.8886 | -7.6191  | 18.9914  | -9.4035  |
| 19 | -9.1588  | -10.3560 | -33.1363 | -7.5553  | -2.3734  | -9.1588  |
| 19 | -8.9529  | -12.5664 | -22.2521 | -9.1346  | -6.0371  | -8.9529  |
| 19 | -8.7488  | -17.6764 | -25.6652 | -7.4175  | -19.3158 | -8.7488  |
| 20 | -9.8997  | -23.2073 | -38.4303 | -10.1196 | -22.4494 | -9.8997  |
| 20 | -9.8335  | -31.9465 | -21.3469 | -8.9687  | -20.5395 | -9.8335  |
| 20 | -9.7847  | -35.4399 | -25.3276 | -8.2725  | -8.5359  | -9.7847  |
| 20 | -9.7056  | -35.4825 | -24.4275 | -9.2452  | -15.0068 | -9.7056  |
| 20 | -9.6922  | -36.1153 | -25.5113 | -9.4894  | 3.0631   | -9.6922  |
| 20 | -9.5823  | -33.9328 | -29.4496 | -8.2530  | -29.6905 | -9.5823  |
| 20 | -9.1916  | -2.2633  | -26.7092 | -8.6151  | -8.2384  | -9.1916  |
| 20 | -9.0225  | -7.9301  | -28.2626 | -9.9367  | 11.8937  | -9.0225  |
| 20 | -9.0159  | 5.6404   | -31.1558 | -8.9310  | 7.7178   | -9.0159  |
| 20 | -8.9593  | -27.5656 | -29.4755 | -8.6201  | -9.2410  | -8.9593  |
| 21 | -10.3466 | -74.5313 | -26.5733 | -7.8552  | 1.1872   | -10.3466 |



|    |          |          |          |          |          |          |
|----|----------|----------|----------|----------|----------|----------|
| 21 | -10.1784 | -65.6338 | -29.5907 | -7.8150  | -9.4752  | -10.1784 |
| 21 | -10.1400 | -73.8693 | -17.7255 | -7.2412  | -13.5851 | -10.1400 |
| 21 | -9.8201  | -71.4550 | -26.7174 | -10.4892 | -16.9526 | -9.8201  |
| 21 | -9.6702  | -75.3307 | -28.0195 | -8.3123  | -13.0244 | -9.6702  |
| 21 | -9.6097  | -74.1524 | -22.4535 | -9.4349  | -25.2809 | -9.6097  |
| 21 | -9.2538  | -59.2648 | -20.9093 | -7.6330  | -1.7428  | -9.2538  |
| 21 | -9.0444  | -76.8688 | -21.0809 | -10.5278 | -12.8067 | -9.0444  |
| 21 | -8.8755  | -70.9223 | -34.8721 | -9.2474  | 11.8864  | -8.8755  |
| 21 | -8.8673  | -74.1085 | -22.1266 | -7.0535  | -15.2793 | -8.8673  |
| 22 | -6.5829  | -45.2019 | -24.1186 | -11.0163 | -21.3166 | -6.5829  |
| 22 | -6.2949  | -39.1498 | -29.4145 | -9.8431  | -18.5776 | -6.2949  |
| 22 | -6.2614  | -41.2986 | -24.1521 | -10.3302 | -22.6898 | -6.2614  |
| 22 | -6.1403  | -39.8166 | -14.3284 | -9.6674  | -8.9823  | -6.1403  |
| 22 | -6.0049  | -35.6872 | -23.6061 | -11.1338 | -15.8810 | -6.0049  |
| 22 | -5.8925  | -36.0508 | -22.5130 | -9.6932  | -9.9161  | -5.8925  |
| 22 | -5.7120  | -38.8513 | -17.1319 | -9.4724  | -16.8881 | -5.7120  |
| 22 | -5.6929  | -39.0247 | -21.8272 | -9.2551  | -5.0394  | -5.6929  |
| 22 | -5.5749  | -28.8211 | -19.6026 | -10.2740 | 7.1840   | -5.5749  |
| 22 | -5.4436  | -36.3360 | -15.2979 | -9.1857  | 5.5821   | -5.4436  |
| 23 | -7.9453  | -32.5525 | -29.2791 | -10.1585 | -21.6102 | -7.9453  |
| 23 | -7.8743  | -38.8735 | -21.0039 | -9.1751  | -6.9734  | -7.8743  |
| 23 | -7.8520  | -47.6927 | -25.3313 | -10.1763 | -19.4091 | -7.8520  |
| 23 | -7.7916  | -44.5202 | -19.7182 | -10.0078 | -6.8589  | -7.7916  |
| 23 | -7.6041  | -38.2136 | -18.8017 | -9.3837  | -10.6959 | -7.6041  |
| 23 | -7.1665  | -25.0813 | -32.5311 | -10.5645 | -7.9834  | -7.1665  |
| 23 | -6.8596  | -41.3360 | -21.4407 | -8.9792  | -20.0473 | -6.8596  |
| 23 | -6.8152  | -31.4049 | -30.8381 | -10.5613 | -17.1668 | -6.8152  |
| 23 | -6.5691  | -36.5193 | -24.6843 | -9.2312  | -15.9135 | -6.5691  |
| 23 | -6.5479  | -37.8798 | -20.8198 | -9.5899  | -3.9509  | -6.5479  |
| 24 | -8.2257  | -37.3468 | -21.3838 | -8.9584  | -10.4321 | -8.2257  |
| 24 | -7.9658  | -46.7672 | -25.2297 | -10.1278 | -16.4499 | -7.9658  |
| 24 | -7.9354  | -37.1187 | -21.0829 | -9.4778  | -3.1675  | -7.9354  |
| 24 | -7.8835  | -31.9361 | -29.3573 | -10.4310 | -21.6342 | -7.8835  |
| 24 | -7.8481  | -43.8213 | -19.4112 | -10.0983 | -3.4339  | -7.8481  |
| 24 | -7.6514  | -43.1165 | -25.8889 | -9.1070  | -14.5444 | -7.6514  |
| 24 | -7.1150  | -40.0278 | -20.7802 | -8.9239  | -18.7713 | -7.1150  |
| 24 | -7.1086  | -23.9030 | -27.9680 | -9.5643  | -8.3010  | -7.1086  |
| 24 | -6.9847  | -40.2804 | -19.9925 | -10.2596 | -19.3855 | -6.9847  |
| 24 | -6.8436  | -30.8219 | -30.7609 | -10.6322 | -17.2149 | -6.8436  |
| 25 | -9.8010  | -0.2864  | -25.3180 | -8.9122  | 1.6786   | -9.8010  |
| 25 | -9.5036  | 48.0792  | -27.6488 | -8.3412  | 13.2863  | -9.5036  |
| 25 | -9.4333  | -23.8532 | -21.7237 | -8.0486  | -27.9726 | -9.4333  |
| 25 | -9.2903  | -22.9323 | -34.9015 | -9.2897  | -25.1079 | -9.2903  |
| 25 | -9.1747  | -15.1628 | -25.4830 | -9.4153  | -19.4816 | -9.1747  |
| 25 | -8.8014  | -24.9057 | -27.7189 | -8.5957  | -25.2209 | -8.8014  |
| 25 | -8.6933  | -22.0933 | -23.5723 | -8.6786  | -20.8280 | -8.6933  |

|    |         |          |          |          |          |         |
|----|---------|----------|----------|----------|----------|---------|
| 25 | -8.6250 | -22.1995 | -28.8001 | -9.0128  | -18.5694 | -8.6250 |
| 25 | -8.4322 | -20.3900 | -31.6146 | -8.4239  | -7.7097  | -8.4322 |
| 25 | -8.2039 | -26.0399 | -30.1917 | -10.8389 | -15.9871 | -8.2039 |
| 26 | -8.4188 | -48.4585 | -32.6319 | -9.2593  | -12.0207 | -8.4188 |
| 26 | -8.3322 | -51.8575 | -29.8560 | -9.2534  | -10.6359 | -8.3322 |
| 26 | -8.1416 | -38.1972 | -28.0455 | -9.3176  | -6.3073  | -8.1416 |
| 26 | -7.5334 | -48.7150 | -27.7979 | -9.0693  | -18.6052 | -7.5334 |
| 26 | -7.5296 | -45.4954 | -26.8853 | -8.7970  | -6.1994  | -7.5296 |
| 26 | -7.4183 | -29.0929 | -23.5025 | -9.0357  | 14.3720  | -7.4183 |
| 26 | -7.1307 | -45.2895 | -18.2753 | -9.5477  | -11.6866 | -7.1307 |
| 26 | -6.8220 | -52.5688 | -20.7508 | -8.6127  | -26.3605 | -6.8220 |
| 26 | -6.8126 | -52.7980 | -23.9842 | -8.9408  | -24.1386 | -6.8126 |
| 26 | -6.7481 | -48.3484 | -24.7800 | -8.7916  | -21.9452 | -6.7481 |

**Table S6.** Ten top scored docking positioning of the 5MAT co-crystallized ligand (**36**) and of the related analogues (**27-111**) at the 5MAT PDB code (MOE software). The predicted  $\Delta G$  value of each protein-ligand complex has been reported, as calculated in terms of final scoring function (S, as Kcal/mol).

| Compound | S        | E_conf  | E_place  | E_score1 | E_refine | E_score2 |
|----------|----------|---------|----------|----------|----------|----------|
| 27       | -13.8512 | 19.8990 | -43.1961 | -11.7123 | -33.0118 | -13.8512 |
| 27       | -13.2111 | 14.3341 | -47.6496 | -13.2845 | -49.7220 | -13.2111 |
| 27       | -13.0939 | 22.3950 | -38.0595 | -10.6986 | -45.1665 | -13.0939 |
| 27       | -13.0310 | 23.0860 | -40.7726 | -9.5778  | -36.0707 | -13.0310 |
| 27       | -12.8640 | 26.9085 | -32.5700 | -9.9519  | -39.0048 | -12.8640 |
| 27       | -12.8452 | 22.9183 | -40.1373 | -12.6830 | -11.0974 | -12.8452 |
| 27       | -12.7959 | 23.2919 | -30.5397 | -9.4822  | -12.0560 | -12.7959 |
| 27       | -12.4992 | 15.0494 | -41.6590 | -12.4822 | -46.9961 | -12.4992 |
| 27       | -12.4291 | 20.3228 | -25.6230 | -10.3228 | -12.7027 | -12.4291 |
| 27       | -12.2688 | 47.6150 | -35.3863 | -9.5620  | -19.7380 | -12.2688 |
| 28       | -13.7933 | 20.5136 | -36.3695 | -11.9576 | -33.1795 | -13.7933 |
| 28       | -13.5993 | 23.7646 | -34.3127 | -10.2732 | -31.9539 | -13.5993 |
| 28       | -13.2294 | 21.3097 | -38.4485 | -11.0205 | -43.3686 | -13.2294 |
| 28       | -12.7786 | 16.0013 | -41.6782 | -10.2130 | -50.6158 | -12.7786 |
| 28       | -12.6065 | 43.0109 | -34.7978 | -10.5834 | -34.3015 | -12.6065 |
| 28       | -12.5922 | 27.5169 | -36.9508 | -10.9090 | -22.2423 | -12.5922 |
| 28       | -12.4279 | 20.9377 | -38.9122 | -9.9867  | -41.8661 | -12.4279 |
| 28       | -11.8322 | 21.6933 | -34.8426 | -12.5748 | -38.1605 | -11.8322 |
| 28       | -11.1703 | 28.1473 | -39.7805 | -10.1053 | -36.8209 | -11.1703 |
| 28       | -11.1669 | 28.1785 | -39.2714 | -10.0919 | -36.8644 | -11.1669 |
| 29       | -13.5610 | 28.9188 | -35.3942 | -9.8132  | -25.6281 | -13.5610 |
| 29       | -13.2728 | 21.7737 | -37.3687 | -9.8373  | -33.9999 | -13.2728 |
| 29       | -13.1734 | 25.6240 | -40.6709 | -10.1765 | -26.8896 | -13.1734 |
| 29       | -12.9733 | 15.2370 | -47.3552 | -12.5202 | -37.1424 | -12.9733 |
| 29       | -12.8407 | 22.0143 | -37.1096 | -16.8381 | -39.3378 | -12.8407 |
| 29       | -12.8074 | 17.1666 | -36.4757 | -10.9632 | -20.0087 | -12.8074 |
| 29       | -12.7987 | 24.3451 | -35.8327 | -12.9319 | -26.8087 | -12.7987 |

|    |          |          |          |          |          |          |
|----|----------|----------|----------|----------|----------|----------|
| 29 | -12.6550 | 20.4753  | -50.8925 | -13.1994 | -26.8969 | -12.6550 |
| 29 | -12.5750 | 27.1464  | -40.3263 | -10.8245 | -23.8529 | -12.5750 |
| 29 | -12.4757 | 22.0879  | -38.8985 | -10.7238 | -26.6940 | -12.4757 |
| 30 | -12.8481 | 18.7634  | -30.4731 | -10.3969 | -34.6136 | -12.8481 |
| 30 | -12.7308 | 30.2546  | -42.4051 | -10.7245 | -29.0960 | -12.7308 |
| 30 | -12.7022 | 19.0084  | -40.0123 | -13.0794 | -33.2987 | -12.7022 |
| 30 | -12.2533 | 12.1384  | -34.0683 | -10.2952 | -49.3284 | -12.2533 |
| 30 | -11.4523 | 32.6988  | -33.5936 | -10.9802 | -26.9011 | -11.4523 |
| 30 | -11.4246 | 14.3461  | -45.0312 | -10.6579 | -43.0877 | -11.4246 |
| 30 | -11.3941 | 14.6740  | -40.7159 | -11.1659 | -44.4056 | -11.3941 |
| 30 | -11.3395 | 37.7396  | -29.8846 | -10.4495 | -26.8998 | -11.3395 |
| 30 | -11.2993 | 36.7691  | -41.1554 | -12.3046 | -26.6708 | -11.2993 |
| 30 | -10.5868 | 44.5546  | -33.7568 | -10.1709 | 4.2797   | -10.5868 |
| 31 | -13.7665 | -34.2014 | -44.8527 | -8.5284  | -29.5514 | -13.7665 |
| 31 | -13.7433 | -33.5328 | -38.7338 | -9.0976  | -35.9491 | -13.7433 |
| 31 | -13.6748 | -30.6335 | -38.1154 | -10.0175 | -35.7954 | -13.6748 |
| 31 | -13.6614 | -36.6577 | -44.6026 | -8.9577  | -32.5031 | -13.6614 |
| 31 | -13.5418 | -38.6822 | -44.8596 | -7.7302  | -41.2775 | -13.5418 |
| 31 | -13.4707 | -17.3477 | -42.9367 | -8.0465  | -15.7683 | -13.4707 |
| 31 | -13.4185 | -2.0717  | -33.6429 | -9.6503  | -11.8363 | -13.4185 |
| 31 | -13.1154 | -35.0731 | -38.6715 | -9.5445  | -14.7303 | -13.1154 |
| 31 | -12.4509 | -29.4201 | -44.5714 | -10.5895 | -32.7545 | -12.4509 |
| 31 | -11.9655 | -29.8461 | -43.1771 | -10.4825 | -7.6319  | -11.9655 |
| 32 | -14.0006 | -44.5943 | -35.9708 | -7.3518  | -52.2306 | -14.0006 |
| 32 | -13.6284 | -36.2096 | -36.5015 | -8.9155  | -43.4281 | -13.6284 |
| 32 | -13.4924 | -39.8865 | -33.2457 | -6.8563  | -45.5756 | -13.4924 |
| 32 | -12.9146 | -13.4036 | -35.5605 | -8.9820  | -25.9612 | -12.9146 |
| 32 | -12.5734 | -23.2643 | -36.1002 | -11.5443 | -14.4709 | -12.5734 |
| 32 | -12.4554 | -25.4020 | -32.1846 | -6.7077  | -30.1256 | -12.4554 |
| 32 | -12.3419 | -19.4887 | -44.4752 | -10.6278 | -38.6995 | -12.3419 |
| 32 | -12.3198 | -21.7785 | -46.9182 | -9.1131  | -24.7787 | -12.3198 |
| 32 | -12.2493 | -32.8255 | -38.4893 | -7.6205  | -45.2202 | -12.2493 |
| 32 | -12.0440 | 20.5016  | -26.4206 | -6.7671  | 34.0724  | -12.0440 |
| 33 | -14.0138 | -40.8196 | -34.4410 | -10.6657 | -39.5058 | -14.0138 |
| 33 | -13.7676 | -38.6884 | -44.9758 | -12.5074 | -32.7214 | -13.7676 |
| 33 | -13.6296 | -41.4731 | -36.6718 | -9.5051  | -40.5945 | -13.6296 |
| 33 | -13.3244 | -5.1951  | -48.3929 | -14.1228 | -18.7416 | -13.3244 |
| 33 | -13.0774 | -28.4142 | -40.9996 | -12.7552 | -23.4711 | -13.0774 |
| 33 | -13.0024 | -31.3044 | -45.4761 | -10.8068 | -29.5890 | -13.0024 |
| 33 | -12.9963 | -22.3188 | -34.6624 | -7.7080  | -8.4716  | -12.9963 |
| 33 | -12.9222 | -32.3423 | -49.9409 | -9.0198  | -38.5617 | -12.9222 |
| 33 | -12.7077 | -33.7822 | -33.3698 | -7.8915  | -9.5056  | -12.7077 |
| 33 | -12.5227 | -32.4870 | -46.5041 | -8.9804  | -24.6842 | -12.5227 |
| 34 | -13.7640 | -17.6397 | -50.3886 | -11.3216 | -37.9434 | -13.7640 |
| 34 | -13.6336 | -17.4945 | -40.2624 | -9.0534  | -40.7014 | -13.6336 |
| 34 | -13.4175 | -26.1063 | -46.5903 | -13.5878 | -48.8494 | -13.4175 |

|    |          |          |          |          |          |          |
|----|----------|----------|----------|----------|----------|----------|
| 34 | -13.3141 | -14.5793 | -44.2070 | -8.5712  | -15.7644 | -13.3141 |
| 34 | -12.9640 | -21.1294 | -42.4607 | -9.3006  | -15.5032 | -12.9640 |
| 34 | -12.3468 | -7.6987  | -45.6512 | -9.1846  | -33.8373 | -12.3468 |
| 34 | -12.3335 | 4.0365   | -38.9412 | -7.7351  | -14.6884 | -12.3335 |
| 34 | -12.1722 | -24.7566 | -46.6333 | -7.4150  | -47.6785 | -12.1722 |
| 34 | -11.9837 | 2.5043   | -38.5293 | -12.6012 | -20.6687 | -11.9837 |
| 34 | -11.7222 | 3.0986   | -36.0657 | -10.2526 | 13.6257  | -11.7222 |
| 35 | -13.9123 | -30.6940 | -52.1551 | -9.0691  | -52.0915 | -13.9123 |
| 35 | -13.6736 | -30.8008 | -41.9155 | -9.8979  | -52.2860 | -13.6736 |
| 35 | -13.6055 | -29.9868 | -47.2390 | -11.4017 | -52.8482 | -13.6055 |
| 35 | -13.5708 | -6.0863  | -48.9925 | -12.9954 | -34.4562 | -13.5708 |
| 35 | -13.3191 | -23.6444 | -50.0908 | -11.9080 | -46.4736 | -13.3191 |
| 35 | -12.8048 | -14.8350 | -41.4670 | -10.5112 | -26.0041 | -12.8048 |
| 35 | -12.7660 | 3.8861   | -35.3415 | -8.8830  | -30.8438 | -12.7660 |
| 35 | -12.6380 | 2.7028   | -42.2043 | -9.9033  | -35.4931 | -12.6380 |
| 35 | -12.4982 | -22.0239 | -54.2046 | -8.9687  | -47.0820 | -12.4982 |
| 35 | -12.3641 | -1.9847  | -48.3263 | -11.5155 | -14.0503 | -12.3641 |
| 36 | -13.6026 | -20.6210 | -53.7004 | -15.1157 | -51.4327 | -13.6026 |
| 36 | -13.5889 | -10.2977 | -35.2132 | -7.9602  | -46.4230 | -13.5889 |
| 36 | -13.0428 | -14.6524 | -37.4798 | -7.1726  | -44.4309 | -13.0428 |
| 36 | -12.6881 | -1.1768  | -42.7482 | -8.0616  | -32.6498 | -12.6881 |
| 36 | -12.5862 | -8.4642  | -34.2406 | -9.7077  | -45.9022 | -12.5862 |
| 36 | -12.4366 | 16.4665  | -45.3031 | -9.1396  | -8.9867  | -12.4366 |
| 36 | -12.1411 | -19.3406 | -55.5793 | -12.9646 | -48.8317 | -12.1411 |
| 36 | -11.9847 | -4.0796  | -37.5540 | -9.6170  | -14.5390 | -11.9847 |
| 36 | -11.7261 | 1.3808   | -43.5532 | -12.5893 | -29.4314 | -11.7261 |
| 36 | -11.5957 | -11.7872 | -40.2544 | -7.2610  | -42.6412 | -11.5957 |
| 37 | -13.3214 | -33.5584 | -38.1982 | -10.1945 | -53.8128 | -13.3214 |
| 37 | -13.1623 | -32.9282 | -44.0711 | -10.3494 | -54.4239 | -13.1623 |
| 37 | -12.9758 | -33.1496 | -51.1265 | -11.4095 | -53.0920 | -12.9758 |
| 37 | -12.5409 | -11.0960 | -39.6599 | -9.8869  | -37.7167 | -12.5409 |
| 37 | -12.4724 | -28.6984 | -44.1670 | -11.8351 | -49.5563 | -12.4724 |
| 37 | -12.3752 | -4.2760  | -39.9129 | -9.8124  | -28.6775 | -12.3752 |
| 37 | -12.0415 | -0.1026  | -37.2286 | -9.3720  | -44.1187 | -12.0415 |
| 37 | -11.9801 | -29.9448 | -41.7596 | -12.2597 | -53.7466 | -11.9801 |
| 37 | -11.9653 | -7.7805  | -35.1027 | -8.8405  | -21.4743 | -11.9653 |
| 37 | -11.7270 | -13.1977 | -39.6514 | -10.7935 | -23.8043 | -11.7270 |
| 38 | -13.3981 | 4.9575   | -40.9022 | -10.5418 | -42.4481 | -13.3981 |
| 38 | -13.1662 | -3.0783  | -38.3598 | -11.5197 | -50.6553 | -13.1662 |
| 38 | -12.6364 | 49.0696  | -36.0929 | -10.5468 | -17.3932 | -12.6364 |
| 38 | -12.4161 | -0.8939  | -45.8682 | -15.5214 | -28.3246 | -12.4161 |
| 38 | -12.3289 | 0.6280   | -42.2444 | -7.6989  | -49.0106 | -12.3289 |
| 38 | -11.9959 | -1.4598  | -38.1605 | -6.7193  | -39.7205 | -11.9959 |
| 38 | -11.5525 | -3.1377  | -35.3100 | -10.3129 | -30.2601 | -11.5525 |
| 38 | -11.3778 | 30.8752  | -40.2948 | -7.0241  | -15.6522 | -11.3778 |
| 38 | -11.1596 | 16.1104  | -34.7962 | -9.0941  | -29.0040 | -11.1596 |

|    |          |          |          |          |          |          |
|----|----------|----------|----------|----------|----------|----------|
| 38 | -10.8567 | 27.7468  | -32.3571 | -7.3581  | 11.8447  | -10.8567 |
| 39 | -12.5896 | 1.2284   | -40.8510 | -10.4871 | -43.7443 | -12.5896 |
| 39 | -12.3767 | -1.0193  | -22.7414 | -8.2605  | -36.5567 | -12.3767 |
| 39 | -12.2847 | 10.6079  | -27.8917 | -10.7867 | -30.6461 | -12.2847 |
| 39 | -12.0136 | -6.5238  | -46.5636 | -9.7272  | -50.5142 | -12.0136 |
| 39 | -11.9907 | 1.6301   | -32.0365 | -9.6012  | -39.8792 | -11.9907 |
| 39 | -11.7289 | 0.1328   | -47.9350 | -13.1341 | -44.3061 | -11.7289 |
| 39 | -11.3853 | -4.1783  | -47.0634 | -12.6566 | -42.2848 | -11.3853 |
| 39 | -11.3514 | 7.3164   | -28.8458 | -8.7414  | -40.5488 | -11.3514 |
| 39 | -11.2344 | 18.2430  | -29.3209 | -10.1047 | -16.5838 | -11.2344 |
| 39 | -11.2288 | -4.3136  | -40.0282 | -9.3302  | -50.0569 | -11.2288 |
| 40 | -14.0032 | -0.7707  | -44.3738 | -9.0391  | -23.8177 | -14.0032 |
| 40 | -13.7801 | -10.6646 | -43.5544 | -8.6926  | -37.1141 | -13.7801 |
| 40 | -13.4991 | -10.0892 | -28.7787 | -10.8442 | -34.0532 | -13.4991 |
| 40 | -13.2724 | -12.3719 | -54.1408 | -10.1707 | -41.0531 | -13.2724 |
| 40 | -12.9570 | -20.3420 | -49.5140 | -10.9151 | -52.6283 | -12.9570 |
| 40 | -12.7464 | 36.5059  | -39.6774 | -11.0504 | -8.2966  | -12.7464 |
| 40 | -12.6200 | -11.5706 | -38.5458 | -9.1477  | -9.6088  | -12.6200 |
| 40 | -12.5950 | -14.9929 | -41.2096 | -11.9880 | -12.1407 | -12.5950 |
| 40 | -12.2539 | -16.4771 | -31.9248 | -8.7512  | -30.8365 | -12.2539 |
| 40 | -12.0013 | 52.5555  | -39.3035 | -9.7990  | 16.3370  | -12.0013 |
| 41 | -13.5511 | -13.2100 | -31.4676 | -9.9335  | -33.4003 | -13.5511 |
| 41 | -13.4789 | -9.6950  | -29.7862 | -9.7098  | -20.8234 | -13.4789 |
| 41 | -13.3264 | -3.9835  | -32.6615 | -11.5881 | -24.4862 | -13.3264 |
| 41 | -12.9364 | -18.8923 | -36.7402 | -12.0232 | -20.1154 | -12.9364 |
| 41 | -12.8886 | -11.5050 | -40.0701 | -12.3425 | -24.4412 | -12.8886 |
| 41 | -12.7519 | -12.1727 | -37.1982 | -11.6345 | -34.0868 | -12.7519 |
| 41 | -12.4783 | -18.4015 | -37.1894 | -11.1595 | -45.7812 | -12.4783 |
| 41 | -12.2522 | -16.9492 | -40.5469 | -13.8644 | -38.2157 | -12.2522 |
| 41 | -12.1766 | -11.4505 | -38.4546 | -9.9999  | -24.1538 | -12.1766 |
| 41 | -12.0101 | -15.5218 | -41.4840 | -9.8669  | -42.8378 | -12.0101 |
| 42 | -12.7192 | -17.2847 | -30.2507 | -10.7294 | -35.1065 | -12.7192 |
| 42 | -12.5080 | -4.1715  | -27.4738 | -11.2150 | -28.7673 | -12.5080 |
| 42 | -12.4262 | -21.7582 | -46.0773 | -11.0130 | -42.1385 | -12.4262 |
| 42 | -12.2180 | -15.7704 | -26.7758 | -10.6742 | -43.9343 | -12.2180 |
| 42 | -12.1684 | -11.4512 | -34.4844 | -9.0041  | -37.4335 | -12.1684 |
| 42 | -11.7978 | -19.1810 | -35.3161 | -10.5006 | -41.8872 | -11.7978 |
| 42 | -11.5818 | -12.6694 | -33.7600 | -8.7547  | -36.6595 | -11.5818 |
| 42 | -10.9494 | 6.0429   | -33.1513 | -10.2307 | -20.5989 | -10.9494 |
| 42 | -10.0181 | 45.4687  | -25.7773 | -8.5781  | 14.4853  | -10.0181 |
| 42 | -9.9754  | 12.2522  | -31.5069 | -8.5314  | 20.5793  | -9.9754  |
| 43 | -11.4166 | -26.6021 | -36.2197 | -10.0276 | -32.7049 | -11.4166 |
| 43 | -11.4124 | -14.3273 | -28.5823 | -11.1820 | -38.9501 | -11.4124 |
| 43 | -10.9305 | -30.3217 | -17.2587 | -9.2917  | -47.8341 | -10.9305 |
| 43 | -10.8638 | -15.0178 | -38.7550 | -9.4134  | -40.0438 | -10.8638 |
| 43 | -10.4175 | -13.7642 | -34.0909 | -11.2312 | -2.7356  | -10.4175 |

|    |          |          |          |          |          |          |
|----|----------|----------|----------|----------|----------|----------|
| 43 | -10.3609 | -18.7102 | -29.5760 | -10.2758 | -36.1569 | -10.3609 |
| 43 | -10.2125 | 0.0244   | -40.3844 | -11.4903 | -12.3740 | -10.2125 |
| 43 | -9.5179  | 54.7409  | -40.8698 | -9.6923  | 38.5640  | -9.5179  |
| 43 | -9.1669  | 10.3397  | -24.2023 | -9.1047  | 7.8721   | -9.1669  |
| 43 | -8.8457  | -6.9708  | -34.6096 | -9.3115  | -22.1128 | -8.8457  |
| 44 | -14.0347 | -10.3253 | -48.3179 | -9.6834  | -39.1517 | -14.0347 |
| 44 | -13.7515 | -7.8029  | -38.7942 | -7.4995  | -41.2130 | -13.7515 |
| 44 | -13.6749 | -16.2315 | -43.2363 | -7.7794  | -35.4194 | -13.6749 |
| 44 | -13.6075 | -11.5926 | -28.4547 | -7.6838  | -42.5105 | -13.6075 |
| 44 | -13.3390 | -19.8514 | -40.8796 | -7.4622  | -53.5541 | -13.3390 |
| 44 | -13.3031 | -18.9304 | -37.4423 | -11.4599 | -46.0426 | -13.3031 |
| 44 | -13.2797 | -10.7259 | -34.9186 | -8.3613  | -34.7792 | -13.2797 |
| 44 | -13.1579 | 1.2545   | -39.5438 | -8.9292  | -32.3028 | -13.1579 |
| 44 | -13.0512 | -12.9617 | -39.7622 | -8.2985  | -45.6125 | -13.0512 |
| 44 | -12.9888 | 13.6495  | -50.4482 | -13.0184 | -17.1723 | -12.9888 |
| 45 | -13.5419 | -22.1804 | -46.8147 | -13.1392 | -46.6126 | -13.5419 |
| 45 | -13.2754 | -23.9385 | -58.3942 | -14.0385 | -50.3643 | -13.2754 |
| 45 | -12.7223 | -19.3172 | -47.5019 | -13.0683 | -45.1110 | -12.7223 |
| 45 | -12.4114 | -17.5152 | -55.0891 | -13.6121 | -38.1268 | -12.4114 |
| 45 | -12.2561 | -11.7990 | -33.6952 | -10.4369 | -23.3546 | -12.2561 |
| 45 | -12.1918 | 3.1134   | -36.4149 | -11.6763 | -25.4335 | -12.1918 |
| 45 | -11.7655 | -16.1135 | -48.2648 | -12.0478 | -49.9158 | -11.7655 |
| 45 | -11.6072 | -8.6433  | -37.3349 | -11.9411 | -36.5438 | -11.6072 |
| 45 | -11.5378 | -13.1703 | -43.0023 | -13.3392 | -32.3785 | -11.5378 |
| 45 | -10.5546 | 23.7107  | -35.9571 | -11.2383 | -10.6790 | -10.5546 |
| 46 | -13.2975 | -21.8807 | -53.9858 | -13.4737 | -41.6838 | -13.2975 |
| 46 | -13.1141 | -26.1278 | -38.8115 | -9.6114  | -49.0905 | -13.1141 |
| 46 | -12.5069 | -21.4024 | -44.1080 | -9.3995  | -44.1746 | -12.5069 |
| 46 | -12.3053 | -15.6082 | -42.5636 | -12.6769 | -27.3567 | -12.3053 |
| 46 | -11.7313 | 2.9387   | -44.5826 | -10.2653 | -33.1775 | -11.7313 |
| 46 | -11.6241 | -19.7851 | -51.7702 | -9.5639  | -48.4754 | -11.6241 |
| 46 | -11.5807 | -20.7137 | -32.8293 | -8.9874  | -44.5154 | -11.5807 |
| 46 | -11.3473 | 3.0037   | -39.7755 | -10.7785 | -24.1779 | -11.3473 |
| 46 | -11.3098 | -8.5977  | -48.0245 | -10.3266 | -37.5450 | -11.3098 |
| 46 | -11.0659 | -13.0864 | -43.3921 | -9.1659  | -44.6833 | -11.0659 |
| 47 | -13.3821 | -26.1688 | -43.8762 | -11.0187 | -52.1650 | -13.3821 |
| 47 | -13.1587 | 15.8179  | -37.3004 | -10.8657 | -23.6752 | -13.1587 |
| 47 | -12.9265 | -20.5126 | -40.7651 | -10.1491 | -44.4801 | -12.9265 |
| 47 | -12.3689 | 11.1423  | -44.0544 | -11.7004 | -26.6998 | -12.3689 |
| 47 | -12.1380 | -13.2793 | -50.9958 | -11.6710 | -24.3165 | -12.1380 |
| 47 | -12.0682 | -8.7567  | -36.4372 | -11.7053 | -41.2941 | -12.0682 |
| 47 | -12.0459 | 3.9665   | -43.3981 | -11.1840 | -29.4694 | -12.0459 |
| 47 | -11.8545 | 2.1064   | -36.1844 | -10.5664 | -35.8327 | -11.8545 |
| 47 | -11.8284 | -3.4644  | -36.8583 | -8.6710  | -29.7918 | -11.8284 |
| 47 | -11.6973 | -24.1103 | -43.5626 | -12.6398 | -45.7107 | -11.6973 |
| 48 | -13.1556 | -25.1576 | -40.2821 | -9.8775  | -50.5338 | -13.1556 |

|    |          |          |          |          |          |          |
|----|----------|----------|----------|----------|----------|----------|
| 48 | -12.9981 | -22.8460 | -37.1197 | -10.5051 | -42.4775 | -12.9981 |
| 48 | -12.6963 | -20.0537 | -46.8380 | -11.4574 | -46.6118 | -12.6963 |
| 48 | -12.2934 | 7.9757   | -33.5355 | -9.4604  | -32.5550 | -12.2934 |
| 48 | -12.2479 | -12.6121 | -45.4599 | -11.3318 | -23.8446 | -12.2479 |
| 48 | -12.0097 | 0.3862   | -44.2684 | -8.7827  | -27.2750 | -12.0097 |
| 48 | -11.6771 | -17.4411 | -51.7076 | -10.7034 | -47.2686 | -11.6771 |
| 48 | -11.5257 | 8.5557   | -36.5825 | -8.9421  | -24.3018 | -11.5257 |
| 48 | -11.1817 | 16.6081  | -26.0066 | -9.5603  | -6.4803  | -11.1817 |
| 48 | -10.9613 | 5.1344   | -41.0108 | -12.3577 | -14.0886 | -10.9613 |
| 49 | -12.7933 | -9.7074  | -21.9221 | -8.0964  | -40.3094 | -12.7933 |
| 49 | -12.7521 | -3.6040  | -26.8038 | -6.6101  | -45.3566 | -12.7521 |
| 49 | -12.7319 | 1.5786   | -34.3900 | -6.2885  | -35.0355 | -12.7319 |
| 49 | -12.1493 | 1.4253   | -32.3483 | -9.5886  | -40.9433 | -12.1493 |
| 49 | -11.6715 | 0.8774   | -39.0125 | -11.3212 | -43.5050 | -11.6715 |
| 49 | -11.6030 | -2.6652  | -32.2241 | -7.3582  | -43.4429 | -11.6030 |
| 49 | -11.3078 | -8.2726  | -39.3298 | -10.8798 | -49.7030 | -11.3078 |
| 49 | -10.8580 | 61.9777  | -34.3435 | -7.1691  | -4.2323  | -10.8580 |
| 49 | -10.5481 | 32.7679  | -37.9815 | -10.4339 | -2.6278  | -10.5481 |
| 49 | -10.3671 | 13.2774  | -22.6225 | -8.9539  | -30.0671 | -10.3671 |
| 50 | -13.8392 | -18.1751 | -30.4046 | -8.6235  | -45.7203 | -13.8392 |
| 50 | -13.6661 | -27.0785 | -49.3611 | -13.1180 | -49.3480 | -13.6661 |
| 50 | -13.0172 | 28.3814  | -38.5343 | -10.0422 | -14.8785 | -13.0172 |
| 50 | -12.9278 | 12.8394  | -44.8245 | -12.7765 | -26.7866 | -12.9278 |
| 50 | -12.4505 | -5.9417  | -36.7734 | -13.6128 | -39.4881 | -12.4505 |
| 50 | -11.8804 | 11.3783  | -37.1219 | -9.1164  | 20.4044  | -11.8804 |
| 50 | -11.8518 | -13.2095 | -48.1415 | -9.4808  | -38.0760 | -11.8518 |
| 50 | -11.7239 | 5.5817   | -34.6484 | -9.1148  | -29.0115 | -11.7239 |
| 50 | -11.7075 | -10.2921 | -37.2823 | -13.3676 | -0.5119  | -11.7075 |
| 50 | -11.5107 | 31.9435  | -29.3437 | -9.4338  | 29.9620  | -11.5107 |
| 51 | -13.7883 | 7.6509   | -46.8929 | -10.1293 | -27.7185 | -13.7883 |
| 51 | -13.2380 | -26.6568 | -58.3904 | -18.9680 | -41.9473 | -13.2380 |
| 51 | -13.2136 | 9.9830   | -36.0956 | -9.5590  | -3.3990  | -13.2136 |
| 51 | -13.1540 | -26.7450 | -54.9873 | -13.0011 | -43.2851 | -13.1540 |
| 51 | -13.1158 | -26.7594 | -47.2821 | -9.5956  | -37.9855 | -13.1158 |
| 51 | -13.0159 | 4.1678   | -33.2303 | -10.3080 | -9.3978  | -13.0159 |
| 51 | -12.9518 | -2.9867  | -33.9749 | -14.2296 | -29.9339 | -12.9518 |
| 51 | -12.7569 | -13.5937 | -34.7216 | -9.5843  | -30.9802 | -12.7569 |
| 51 | -12.7455 | -24.3533 | -51.5597 | -12.3108 | -42.6786 | -12.7455 |
| 51 | -12.6641 | -9.4377  | -31.6432 | -9.6153  | -28.9647 | -12.6641 |
| 52 | -12.9806 | -28.9372 | -52.8971 | -11.4308 | -52.9894 | -12.9806 |
| 52 | -12.4618 | 4.3009   | -44.4114 | -12.1447 | -37.9971 | -12.4618 |
| 52 | -12.3771 | -23.6996 | -45.6748 | -13.0755 | -47.3868 | -12.3771 |
| 52 | -12.3157 | -8.4034  | -37.3597 | -11.2706 | -25.9177 | -12.3157 |
| 52 | -11.8850 | -11.4651 | -31.8572 | -8.6076  | -32.3071 | -11.8850 |
| 52 | -11.8782 | -6.7971  | -55.1378 | -13.0544 | -44.9926 | -11.8782 |
| 52 | -11.8701 | 2.5317   | -26.9295 | -11.0123 | -31.3625 | -11.8701 |



|    |          |          |          |          |          |          |
|----|----------|----------|----------|----------|----------|----------|
| 52 | -11.7362 | -21.1704 | -49.8952 | -10.0522 | -49.6559 | -11.7362 |
| 52 | -11.4888 | 0.1870   | -32.7496 | -11.6447 | -29.6304 | -11.4888 |
| 52 | -11.4493 | -10.6219 | -29.3432 | -13.2205 | -41.0117 | -11.4493 |
| 53 | -12.1244 | -16.3808 | -33.7633 | -9.7718  | -45.8756 | -12.1244 |
| 53 | -11.7586 | -24.9152 | -37.9334 | -13.3320 | -37.7661 | -11.7586 |
| 53 | -11.6973 | -36.7841 | -50.3262 | -15.1446 | -45.0810 | -11.6973 |
| 53 | -11.6679 | -15.0802 | -31.6507 | -10.7842 | -30.4491 | -11.6679 |
| 53 | -11.5853 | -29.8594 | -27.4664 | -9.5643  | -40.5194 | -11.5853 |
| 53 | -11.5847 | -6.3379  | -28.5108 | -10.5223 | -22.9851 | -11.5847 |
| 53 | -11.5283 | -14.6597 | -37.9745 | -9.5021  | -38.4061 | -11.5283 |
| 53 | -11.1510 | -5.1789  | -34.4352 | -12.8692 | -31.8544 | -11.1510 |
| 53 | -10.8981 | -13.4692 | -41.4048 | -10.2757 | -18.1005 | -10.8981 |
| 53 | -10.6784 | -22.2780 | -44.1126 | -10.4752 | -45.7846 | -10.6784 |
| 54 | -14.6185 | -26.0278 | -34.5468 | -8.7438  | -49.7642 | -14.6185 |
| 54 | -14.2622 | -27.0783 | -53.4028 | -14.8399 | -50.4705 | -14.2622 |
| 54 | -13.6954 | -21.1861 | -34.2916 | -8.4222  | -46.1712 | -13.6954 |
| 54 | -13.6003 | -28.7744 | -50.8359 | -11.7983 | -50.4383 | -13.6003 |
| 54 | -13.5535 | -15.6099 | -36.1169 | -13.3530 | -43.7820 | -13.5535 |
| 54 | -13.4837 | -11.6425 | -38.2003 | -10.0242 | -16.9913 | -13.4837 |
| 54 | -13.4012 | -23.8097 | -50.3499 | -10.3969 | -56.0773 | -13.4012 |
| 54 | -13.2315 | -12.9052 | -43.5539 | -8.7183  | -18.7741 | -13.2315 |
| 54 | -13.1380 | 25.0088  | -37.3259 | -9.2597  | -20.4772 | -13.1380 |
| 54 | -13.0218 | 11.7680  | -46.9775 | -9.7545  | -29.4251 | -13.0218 |
| 55 | -12.5108 | -38.6145 | -34.1747 | -10.2303 | -48.8318 | -12.5108 |
| 55 | -12.0345 | -30.7563 | -40.6124 | -10.7600 | -34.9088 | -12.0345 |
| 55 | -11.5653 | -39.5727 | -56.9283 | -13.5959 | -49.2778 | -11.5653 |
| 55 | -11.5252 | -35.8523 | -40.4632 | -10.6461 | -44.6601 | -11.5252 |
| 55 | -11.2118 | -9.8840  | -40.5530 | -10.7072 | -34.5762 | -11.2118 |
| 55 | -11.2021 | -16.6496 | -29.5262 | -10.5766 | -27.9855 | -11.2021 |
| 55 | -11.1291 | -20.9423 | -46.9576 | -11.2346 | -28.8825 | -11.1291 |
| 55 | -10.8769 | -25.1403 | -46.7387 | -12.1593 | -42.4818 | -10.8769 |
| 55 | -10.5114 | -35.6424 | -44.2518 | -12.7907 | -44.8490 | -10.5114 |
| 55 | -10.4169 | -21.7600 | -35.5243 | -11.7051 | -12.1192 | -10.4169 |
| 56 | -14.1830 | -8.8564  | -31.8562 | -5.7408  | -20.9343 | -14.1830 |
| 56 | -13.7064 | 1.0132   | -34.2297 | -6.0833  | -12.6849 | -13.7064 |
| 56 | -13.6645 | -25.1134 | -57.5025 | -15.7181 | -44.3644 | -13.6645 |
| 56 | -13.5320 | -23.6290 | -62.6683 | -15.0014 | -48.6397 | -13.5320 |
| 56 | -12.8553 | 12.3955  | -51.4116 | -10.1350 | -16.4720 | -12.8553 |
| 56 | -12.7569 | -12.3379 | -44.3988 | -7.9754  | -40.5060 | -12.7569 |
| 56 | -12.7087 | 16.5573  | -41.9856 | -6.8657  | -23.4981 | -12.7087 |
| 56 | -12.6397 | -12.0491 | -50.2470 | -7.2176  | -42.0270 | -12.6397 |
| 56 | -12.4116 | -8.2579  | -33.9495 | -6.3058  | -42.9889 | -12.4116 |
| 56 | -12.1113 | -18.5716 | -34.9932 | -7.2034  | -51.1063 | -12.1113 |
| 57 | -13.6550 | -26.9699 | -40.6004 | -6.9055  | -51.6924 | -13.6550 |
| 57 | -13.4206 | -20.1427 | -41.7333 | -9.9497  | -42.8487 | -13.4206 |
| 57 | -12.7985 | 0.4067   | -31.3176 | -7.6495  | -21.1334 | -12.7985 |

|    |          |          |          |          |          |          |
|----|----------|----------|----------|----------|----------|----------|
| 57 | -12.6458 | -7.7168  | -39.1107 | -7.9225  | -36.7553 | -12.6458 |
| 57 | -12.5077 | -4.9713  | -40.4629 | -7.3566  | -23.8941 | -12.5077 |
| 57 | -12.1400 | -22.4970 | -35.3129 | -7.2954  | -51.5332 | -12.1400 |
| 57 | -12.1142 | 2.5505   | -37.3789 | -7.8197  | -14.2406 | -12.1142 |
| 57 | -12.0795 | -16.9935 | -33.2184 | -6.5594  | -44.7513 | -12.0795 |
| 57 | -11.9635 | -18.1802 | -47.0230 | -8.4971  | -47.5477 | -11.9635 |
| 57 | -11.8314 | -4.4014  | -38.9400 | -8.5301  | -21.5823 | -11.8314 |
| 58 | -14.3016 | -0.3993  | -27.4885 | -7.7850  | -28.3905 | -14.3016 |
| 58 | -13.4936 | -27.0620 | -42.3317 | -12.9667 | -41.4724 | -13.4936 |
| 58 | -13.2147 | -27.4859 | -28.0230 | -7.0678  | -39.7205 | -13.2147 |
| 58 | -13.1740 | -22.8668 | -27.4706 | -9.0573  | -39.3521 | -13.1740 |
| 58 | -13.1523 | -18.1139 | -52.1759 | -11.9675 | -29.9761 | -13.1523 |
| 58 | -12.9894 | 156.3997 | -25.8789 | -8.0220  | -24.5266 | -12.9894 |
| 58 | -12.7916 | -11.4853 | -30.7798 | -10.9079 | -30.0139 | -12.7916 |
| 58 | -12.6407 | -25.9884 | -40.7841 | -11.3975 | -39.0247 | -12.6407 |
| 58 | -12.1244 | -13.3346 | -34.9376 | -9.6400  | -27.7983 | -12.1244 |
| 58 | -12.0252 | -14.2841 | -36.6422 | -9.9344  | -40.2411 | -12.0252 |
| 59 | -13.2718 | -20.2551 | -39.2537 | -9.4082  | -40.0476 | -13.2718 |
| 59 | -13.0911 | -28.4623 | -40.8507 | -9.1953  | -50.1638 | -13.0911 |
| 59 | -12.2647 | -27.3340 | -31.1926 | -8.5219  | -46.9763 | -12.2647 |
| 59 | -11.9778 | -17.2239 | -32.3321 | -8.0337  | -24.7821 | -11.9778 |
| 59 | -11.9341 | -10.3280 | -40.7646 | -10.9912 | -27.2495 | -11.9341 |
| 59 | -11.9087 | -16.1516 | -32.4795 | -13.6776 | -21.4284 | -11.9087 |
| 59 | -11.7667 | -11.6529 | -32.7501 | -8.8027  | -39.3952 | -11.7667 |
| 59 | -11.6463 | -0.6526  | -34.8905 | -10.6542 | -34.6521 | -11.6463 |
| 59 | -11.4428 | -20.8476 | -49.0451 | -12.3816 | -48.8932 | -11.4428 |
| 59 | -11.3742 | -20.4922 | -45.3874 | -11.5512 | -50.4936 | -11.3742 |
| 60 | -13.2075 | -48.4054 | -40.1493 | -10.8937 | -49.1921 | -13.2075 |
| 60 | -12.7155 | -35.5933 | -34.3425 | -10.8909 | -34.8162 | -12.7155 |
| 60 | -12.6208 | -43.9062 | -35.6014 | -8.3528  | -43.7297 | -12.6208 |
| 60 | -12.4807 | -39.5102 | -33.1673 | -8.2524  | -26.5661 | -12.4807 |
| 60 | -12.3872 | -49.0280 | -55.8362 | -11.7723 | -52.6159 | -12.3872 |
| 60 | -12.0067 | -44.7143 | -44.5592 | -11.8999 | -47.4870 | -12.0067 |
| 60 | -11.9919 | -61.8779 | -43.8852 | -8.1424  | -56.4139 | -11.9919 |
| 60 | -11.9806 | -34.5630 | -36.6362 | -9.5903  | -38.8203 | -11.9806 |
| 60 | -11.9268 | -38.1599 | -35.1911 | -9.4343  | -26.4134 | -11.9268 |
| 60 | -11.4305 | -53.1167 | -31.8499 | -8.6353  | -53.4131 | -11.4305 |
| 61 | -12.5530 | -49.8130 | -51.9517 | -9.8812  | -51.0399 | -12.5530 |
| 61 | -12.2047 | -61.3790 | -46.0253 | -6.9513  | -53.7175 | -12.2047 |
| 61 | -12.0921 | -54.1304 | -31.6421 | -6.4168  | -38.5454 | -12.0921 |
| 61 | -11.9229 | -51.1252 | -29.0060 | -7.6181  | -37.7394 | -11.9229 |
| 61 | -11.9068 | -26.2420 | -29.1773 | -6.7668  | -34.8186 | -11.9068 |
| 61 | -11.7751 | -51.9403 | -36.6503 | -7.0082  | -42.8068 | -11.7751 |
| 61 | -11.6799 | -28.9007 | -38.1284 | -6.3571  | -31.8758 | -11.6799 |
| 61 | -11.5330 | -56.7927 | -38.2355 | -8.3208  | -47.8067 | -11.5330 |
| 61 | -11.3320 | -33.9165 | -33.1656 | -10.0188 | -28.0285 | -11.3320 |

|    |          |          |          |          |          |          |
|----|----------|----------|----------|----------|----------|----------|
| 61 | -10.9573 | -24.1948 | -33.2862 | -7.3768  | 0.9153   | -10.9573 |
| 62 | -12.8540 | -42.3809 | -39.9832 | -10.4330 | -53.1147 | -12.8540 |
| 62 | -12.4902 | -30.3087 | -46.0509 | -11.1391 | -35.2665 | -12.4902 |
| 62 | -12.3279 | -53.2756 | -55.4473 | -12.8699 | -54.9192 | -12.3279 |
| 62 | -12.3272 | -37.8065 | -33.9747 | -7.4054  | -47.4412 | -12.3272 |
| 62 | -11.8563 | -43.6080 | -35.1313 | -10.3697 | -44.3985 | -11.8563 |
| 62 | -11.6217 | -48.5963 | -48.5129 | -11.9105 | -49.1575 | -11.6217 |
| 62 | -11.5146 | -22.4542 | -41.2770 | -8.9547  | -32.1601 | -11.5146 |
| 62 | -11.4508 | -26.6763 | -37.6921 | -7.6513  | -28.6058 | -11.4508 |
| 62 | -11.3525 | -37.8352 | -42.4645 | -11.8782 | -31.9592 | -11.3525 |
| 62 | -10.3463 | -35.8754 | -33.8431 | -10.5629 | -23.4638 | -10.3463 |
| 63 | -13.2525 | -6.2756  | -42.5933 | -8.9734  | -26.0298 | -13.2525 |
| 63 | -12.9550 | -16.7276 | -34.1030 | -8.7086  | -35.7748 | -12.9550 |
| 63 | -12.9088 | 29.5713  | -39.5973 | -8.1115  | -16.8710 | -12.9088 |
| 63 | -12.7972 | -21.3276 | -39.8552 | -9.5525  | -35.7076 | -12.7972 |
| 63 | -12.5679 | -24.0458 | -42.6747 | -9.4972  | -49.8591 | -12.5679 |
| 63 | -12.5286 | 5.3555   | -42.2068 | -9.1755  | -27.5184 | -12.5286 |
| 63 | -12.5125 | -23.3497 | -36.7474 | -7.6593  | -46.8865 | -12.5125 |
| 63 | -12.1636 | -0.6526  | -43.1836 | -8.9224  | -26.4689 | -12.1636 |
| 63 | -12.0483 | -11.6229 | -31.8981 | -7.1367  | -38.4928 | -12.0483 |
| 63 | -11.8618 | -17.9441 | -43.2079 | -13.1748 | -13.4143 | -11.8618 |
| 64 | -13.8097 | -7.3049  | -38.3513 | -12.8912 | -29.0650 | -13.8097 |
| 64 | -13.2814 | -17.2722 | -32.7194 | -10.3465 | -35.1301 | -13.2814 |
| 64 | -12.6986 | -8.5669  | -38.6921 | -8.8118  | -31.4763 | -12.6986 |
| 64 | -12.4663 | 0.8389   | -43.2471 | -11.4945 | -14.0134 | -12.4663 |
| 64 | -12.4062 | -23.5899 | -39.3265 | -10.2675 | -46.5382 | -12.4062 |
| 64 | -12.3469 | -23.5615 | -42.8033 | -9.0918  | -46.6341 | -12.3469 |
| 64 | -12.1303 | -11.5912 | -46.0056 | -8.6503  | -38.6653 | -12.1303 |
| 64 | -12.0466 | -8.8167  | -38.4024 | -8.9616  | -17.4070 | -12.0466 |
| 64 | -11.5609 | -16.4439 | -42.0832 | -10.2160 | -40.0849 | -11.5609 |
| 64 | -11.5365 | -22.3071 | -41.7942 | -8.5068  | -43.2138 | -11.5365 |
| 65 | -12.9602 | -21.1204 | -37.6510 | -12.2081 | -34.8482 | -12.9602 |
| 65 | -12.3153 | -20.7404 | -41.5716 | -11.1575 | -36.4752 | -12.3153 |
| 65 | -11.9880 | -8.1979  | -31.4857 | -9.0963  | -35.2679 | -11.9880 |
| 65 | -11.9637 | -26.5573 | -43.3226 | -9.6534  | -45.3685 | -11.9637 |
| 65 | -11.8193 | -10.5129 | -40.4252 | -11.6558 | -31.7654 | -11.8193 |
| 65 | -11.7695 | -26.2150 | -36.8579 | -9.8613  | -47.6667 | -11.7695 |
| 65 | -11.6979 | -26.2258 | -23.6157 | -8.2318  | -47.6878 | -11.6979 |
| 65 | -11.6623 | -19.9120 | -35.4432 | -8.4619  | -39.8155 | -11.6623 |
| 65 | -11.4905 | -19.9490 | -41.6359 | -9.0957  | -43.1325 | -11.4905 |
| 65 | -11.2418 | -21.1449 | -46.6909 | -11.4705 | -43.5161 | -11.2418 |
| 66 | -13.6990 | -26.1916 | -45.1097 | -8.6150  | -43.8589 | -13.6990 |
| 66 | -13.3732 | -20.1699 | -42.8221 | -12.1253 | -31.0348 | -13.3732 |
| 66 | -13.2886 | -17.6663 | -49.9053 | -12.7866 | -40.6390 | -13.2886 |
| 66 | -13.0796 | -9.1628  | -37.1722 | -9.0928  | -25.3483 | -13.0796 |
| 66 | -13.0780 | -19.4362 | -38.7221 | -9.4091  | -11.8869 | -13.0780 |

|    |          |          |          |          |          |          |
|----|----------|----------|----------|----------|----------|----------|
| 66 | -12.8610 | -23.8370 | -49.1472 | -11.9056 | -36.0190 | -12.8610 |
| 66 | -12.8095 | -19.1408 | -47.6619 | -10.9694 | -42.8989 | -12.8095 |
| 66 | -12.1663 | -25.0890 | -30.4856 | -8.1567  | -30.2497 | -12.1663 |
| 66 | -12.1067 | 5.8700   | -37.8185 | -9.4969  | -18.8537 | -12.1067 |
| 66 | -12.0772 | -21.6829 | -45.7581 | -13.7578 | -13.5120 | -12.0772 |
| 67 | -13.9796 | -20.6041 | -43.0267 | -10.7297 | -34.4042 | -13.9796 |
| 67 | -13.4776 | -25.7803 | -39.5777 | -10.3523 | -40.7110 | -13.4776 |
| 67 | -13.0869 | -20.8451 | -34.4727 | -9.0522  | -34.8810 | -13.0869 |
| 67 | -12.7911 | -24.7405 | -39.2548 | -8.7914  | -47.0249 | -12.7911 |
| 67 | -12.5278 | -20.3770 | -39.3209 | -10.2211 | -43.9894 | -12.5278 |
| 67 | -12.5162 | -11.4448 | -42.1218 | -8.9182  | -16.9667 | -12.5162 |
| 67 | -12.3918 | -25.9171 | -49.7430 | -10.3040 | -46.3417 | -12.3918 |
| 67 | -12.1342 | -18.9841 | -44.7963 | -8.9992  | -40.4572 | -12.1342 |
| 67 | -12.0536 | -16.1618 | -40.0572 | -9.5105  | -37.3238 | -12.0536 |
| 67 | -11.9251 | 14.2625  | -37.3588 | -9.3029  | -24.1452 | -11.9251 |
| 68 | -14.0554 | -18.1182 | -37.9432 | -11.7738 | -33.8052 | -14.0554 |
| 68 | -13.9820 | -17.5183 | -50.4422 | -12.3431 | -23.0904 | -13.9820 |
| 68 | -13.6401 | -17.5452 | -46.8268 | -11.9360 | -26.7259 | -13.6401 |
| 68 | -13.4916 | -14.3456 | -37.4747 | -10.7835 | -28.3440 | -13.4916 |
| 68 | -13.1126 | -18.3998 | -37.6185 | -13.0567 | -34.7212 | -13.1126 |
| 68 | -13.0386 | -24.3894 | -39.0903 | -12.1890 | -18.4818 | -13.0386 |
| 68 | -12.9899 | -25.7458 | -39.8891 | -11.8399 | -30.8272 | -12.9899 |
| 68 | -12.9545 | -16.1429 | -32.9921 | -10.8480 | -27.9704 | -12.9545 |
| 68 | -12.7784 | -25.3711 | -45.4381 | -13.5095 | -32.5497 | -12.7784 |
| 68 | -12.6078 | -25.7272 | -50.4269 | -12.3277 | -37.7286 | -12.6078 |
| 69 | -12.9563 | -23.8870 | -40.8116 | -11.9337 | -36.5296 | -12.9563 |
| 69 | -12.3779 | -22.3282 | -39.4844 | -11.8521 | -43.2589 | -12.3779 |
| 69 | -11.8656 | -25.0779 | -39.2201 | -10.2093 | -37.8377 | -11.8656 |
| 69 | -11.7229 | -28.6378 | -42.2671 | -11.7101 | -48.2044 | -11.7229 |
| 69 | -11.5304 | -16.2834 | -31.1486 | -9.6968  | -18.6652 | -11.5304 |
| 69 | -10.8914 | -18.4420 | -36.4562 | -9.0827  | -38.3225 | -10.8914 |
| 69 | -10.8306 | -21.4203 | -40.4016 | -9.4648  | -36.4363 | -10.8306 |
| 69 | -10.5235 | 37.0160  | -30.8162 | -9.0301  | 13.1881  | -10.5235 |
| 69 | -10.4766 | -25.2370 | -45.2662 | -9.5556  | -39.9727 | -10.4766 |
| 69 | -9.7537  | 1.3724   | -35.7753 | -9.8240  | -7.9178  | -9.7537  |
| 70 | -13.5819 | 10.0278  | -42.4961 | -10.1223 | -40.8663 | -13.5819 |
| 70 | -13.3155 | 0.5682   | -39.9373 | -9.6047  | -33.6458 | -13.3155 |
| 70 | -13.1174 | 5.3806   | -48.4417 | -9.3742  | -41.6500 | -13.1174 |
| 70 | -13.0864 | 5.5582   | -29.0141 | -8.5717  | -35.6014 | -13.0864 |
| 70 | -12.9534 | 0.9420   | -32.6021 | -8.0287  | -46.4601 | -12.9534 |
| 70 | -12.8138 | 4.2039   | -42.0227 | -9.0392  | -42.7179 | -12.8138 |
| 70 | -12.6226 | -0.3812  | -41.6789 | -8.1908  | -44.8631 | -12.6226 |
| 70 | -12.5749 | -1.1950  | -42.8061 | -8.9154  | -52.2435 | -12.5749 |
| 70 | -12.5177 | 21.5870  | -42.2501 | -10.9006 | -17.8454 | -12.5177 |
| 70 | -12.1809 | 3.3880   | -42.1251 | -12.0814 | -12.7195 | -12.1809 |
| 71 | -13.1870 | 2.8624   | -27.5499 | -8.8430  | -34.3427 | -13.1870 |

|    |          |          |          |          |          |          |
|----|----------|----------|----------|----------|----------|----------|
| 71 | -12.9428 | 3.1183   | -43.6675 | -13.1180 | -41.9389 | -12.9428 |
| 71 | -12.5911 | 5.8723   | -46.0598 | -10.6032 | -30.0194 | -12.5911 |
| 71 | -12.4529 | -1.7383  | -41.6535 | -9.2859  | -45.1535 | -12.4529 |
| 71 | -12.2625 | -0.5289  | -42.1070 | -10.0975 | -40.7761 | -12.2625 |
| 71 | -12.0157 | 21.8958  | -34.8732 | -9.2158  | -44.8307 | -12.0157 |
| 71 | -12.0082 | 12.1940  | -40.1841 | -10.0431 | -37.3950 | -12.0082 |
| 71 | -11.9563 | 0.0098   | -39.1102 | -9.5417  | -42.3112 | -11.9563 |
| 71 | -11.8663 | 22.5822  | -41.6244 | -9.1570  | -14.8974 | -11.8663 |
| 71 | -11.8458 | 21.3186  | -37.8986 | -11.2390 | -24.7929 | -11.8458 |
| 72 | -13.0397 | 9.2150   | -40.0832 | -9.2682  | -27.8820 | -13.0397 |
| 72 | -12.8774 | 0.7065   | -45.2566 | -11.2030 | -40.8816 | -12.8774 |
| 72 | -12.8314 | 5.6678   | -33.5344 | -9.5180  | -22.8113 | -12.8314 |
| 72 | -12.5340 | -0.3338  | -30.7183 | -10.6726 | -21.1406 | -12.5340 |
| 72 | -12.3659 | -0.0542  | -38.7093 | -12.1875 | -19.0222 | -12.3659 |
| 72 | -12.3029 | 2.3869   | -37.9407 | -11.7040 | -17.4233 | -12.3029 |
| 72 | -12.1687 | 7.7400   | -48.0398 | -12.5223 | -24.5363 | -12.1687 |
| 72 | -12.0770 | -0.9942  | -33.5715 | -9.2360  | -42.9842 | -12.0770 |
| 72 | -11.9319 | -0.5503  | -42.4828 | -9.8406  | -37.1244 | -11.9319 |
| 72 | -11.7902 | 6.7056   | -40.9639 | -10.5717 | -22.2223 | -11.7902 |
| 73 | -12.1242 | 11.0783  | -44.0825 | -10.9884 | -30.8833 | -12.1242 |
| 73 | -12.0210 | -4.3143  | -42.0468 | -9.7059  | -49.1064 | -12.0210 |
| 73 | -11.9897 | 1.5939   | -47.1845 | -11.5558 | -35.3343 | -11.9897 |
| 73 | -11.8780 | 0.4270   | -40.2111 | -9.5763  | -34.9995 | -11.8780 |
| 73 | -11.7647 | -1.3834  | -36.7558 | -11.7671 | -51.0333 | -11.7647 |
| 73 | -11.6986 | -5.0755  | -45.2331 | -8.8916  | -48.0791 | -11.6986 |
| 73 | -11.3383 | 11.7065  | -45.1391 | -11.6144 | -34.6996 | -11.3383 |
| 73 | -11.1974 | 44.0495  | -36.1861 | -10.3426 | 5.6609   | -11.1974 |
| 73 | -10.9940 | 2.4898   | -40.9806 | -12.2828 | -37.2986 | -10.9940 |
| 73 | -10.9881 | 6.1537   | -35.0667 | -8.8060  | -40.7933 | -10.9881 |
| 74 | -13.8489 | -32.5307 | -48.8934 | -10.0055 | -46.4677 | -13.8489 |
| 74 | -13.7663 | 0.4675   | -43.6974 | -12.7331 | -28.3803 | -13.7663 |
| 74 | -13.6627 | -38.9106 | -47.2444 | -8.2327  | -52.8485 | -13.6627 |
| 74 | -13.5468 | -40.5021 | -59.6758 | -11.9006 | -52.4207 | -13.5468 |
| 74 | -13.3689 | -41.0621 | -47.6604 | -9.5703  | -49.9103 | -13.3689 |
| 74 | -12.8775 | 8.2213   | -43.6956 | -10.7965 | -23.6472 | -12.8775 |
| 74 | -12.7754 | -27.1977 | -36.3298 | -7.7630  | -44.8754 | -12.7754 |
| 74 | -12.7703 | -17.1736 | -32.1398 | -7.9922  | -2.1970  | -12.7703 |
| 74 | -12.7087 | -20.3114 | -33.7432 | -7.3479  | -40.3846 | -12.7087 |
| 74 | -12.5402 | -19.8285 | -32.1602 | -10.4698 | -38.4415 | -12.5402 |
| 75 | -14.0655 | -33.8764 | -60.1582 | -12.0739 | -44.1596 | -14.0655 |
| 75 | -13.6964 | -38.0821 | -43.9529 | -8.0344  | -52.5235 | -13.6964 |
| 75 | -13.5125 | -37.6699 | -42.7299 | -8.4829  | -50.9122 | -13.5125 |
| 75 | -13.4173 | -34.2776 | -37.9330 | -7.9206  | -42.9651 | -13.4173 |
| 75 | -13.4130 | -17.6552 | -43.2731 | -15.6438 | -22.6807 | -13.4130 |
| 75 | -13.3757 | -31.0101 | -45.5880 | -10.3648 | -46.5985 | -13.3757 |
| 75 | -13.1609 | -32.9860 | -45.7972 | -8.8278  | -45.5647 | -13.1609 |

|    |          |          |          |          |          |          |
|----|----------|----------|----------|----------|----------|----------|
| 75 | -12.9492 | -12.1716 | -44.4738 | -9.2814  | -27.7082 | -12.9492 |
| 75 | -12.8156 | -0.4991  | -37.4895 | -8.7986  | -26.4949 | -12.8156 |
| 75 | -12.7967 | -26.6143 | -52.9189 | -12.3132 | -25.1914 | -12.7967 |
| 76 | -13.9292 | -39.2634 | -46.8367 | -7.1933  | -44.9765 | -13.9292 |
| 76 | -13.6377 | -40.0015 | -44.2593 | -7.1998  | -44.0657 | -13.6377 |
| 76 | -13.2951 | -39.3029 | -43.2114 | -8.6893  | -48.7937 | -13.2951 |
| 76 | -13.1568 | -5.9274  | -37.0760 | -8.4328  | -27.8270 | -13.1568 |
| 76 | -13.0170 | -30.1591 | -36.7141 | -9.7943  | -31.9130 | -13.0170 |
| 76 | -12.9779 | -36.4143 | -49.2342 | -12.0558 | -42.7715 | -12.9779 |
| 76 | -12.9476 | -40.7417 | -41.7939 | -9.1464  | -42.2070 | -12.9476 |
| 76 | -12.7055 | -20.2260 | -30.4988 | -9.6003  | -29.8102 | -12.7055 |
| 76 | -12.7024 | -24.1763 | -31.6757 | -9.2527  | -28.8197 | -12.7024 |
| 76 | -12.6973 | -22.3260 | -40.1837 | -11.7373 | -24.8877 | -12.6973 |
| 77 | -13.1494 | -40.9720 | -44.4650 | -7.7308  | -53.6862 | -13.1494 |
| 77 | -12.5211 | -19.7384 | -27.6489 | -7.9245  | -18.9267 | -12.5211 |
| 77 | -12.2440 | -24.5346 | -37.6091 | -8.0572  | -22.6872 | -12.2440 |
| 77 | -12.0505 | -23.4653 | -45.2955 | -11.8167 | -29.4346 | -12.0505 |
| 77 | -12.0385 | -37.3485 | -34.3170 | -9.0752  | -56.5688 | -12.0385 |
| 77 | -11.9113 | -23.5212 | -35.7438 | -10.3223 | -43.5955 | -11.9113 |
| 77 | -11.8806 | -29.2447 | -28.5172 | -7.3497  | -23.6369 | -11.8806 |
| 77 | -11.8451 | -10.1206 | -35.8086 | -7.5769  | -30.9538 | -11.8451 |
| 77 | -11.7148 | -31.6879 | -39.8384 | -10.2185 | -28.9841 | -11.7148 |
| 77 | -11.6427 | -14.1719 | -33.7296 | -7.2354  | -36.9870 | -11.6427 |
| 78 | -13.7127 | -11.9609 | -38.9126 | -9.2917  | -47.6524 | -13.7127 |
| 78 | -13.7080 | -15.6706 | -51.4639 | -8.9759  | -39.7048 | -13.7080 |
| 78 | -12.6542 | -17.4139 | -48.4204 | -11.3897 | -46.6990 | -12.6542 |
| 78 | -12.5349 | 0.2403   | -41.5929 | -11.5606 | -21.2611 | -12.5349 |
| 78 | -12.3488 | 18.2204  | -40.8288 | -10.3538 | -10.6153 | -12.3488 |
| 78 | -12.3158 | 24.4893  | -35.8284 | -9.3144  | -13.5906 | -12.3158 |
| 78 | -12.2359 | -10.4053 | -47.4087 | -12.8263 | -40.3314 | -12.2359 |
| 78 | -12.0949 | -8.6991  | -44.0252 | -10.8340 | -39.1762 | -12.0949 |
| 78 | -12.0448 | -11.0023 | -56.2595 | -14.1227 | -38.8541 | -12.0448 |
| 78 | -11.9904 | -14.2157 | -50.3168 | -12.2318 | -35.4613 | -11.9904 |
| 79 | -13.5783 | -9.6244  | -28.5713 | -8.1905  | -32.1612 | -13.5783 |
| 79 | -13.5338 | 1.6005   | -32.8018 | -7.9744  | -28.6620 | -13.5338 |
| 79 | -13.3020 | -15.3187 | -39.8662 | -8.5615  | -44.3143 | -13.3020 |
| 79 | -13.0831 | -9.9464  | -50.4527 | -13.0995 | -15.7197 | -13.0831 |
| 79 | -13.0581 | -8.9146  | -32.2325 | -8.1431  | -41.1142 | -13.0581 |
| 79 | -13.0538 | -13.4696 | -42.1817 | -11.2506 | -34.2131 | -13.0538 |
| 79 | -12.7238 | -12.9127 | -38.9388 | -8.4341  | -43.9016 | -12.7238 |
| 79 | -12.6669 | 7.3694   | -33.2255 | -7.9134  | -25.0437 | -12.6669 |
| 79 | -12.3578 | -10.0294 | -39.3106 | -8.8944  | -40.4550 | -12.3578 |
| 79 | -11.8933 | 7.1920   | -37.1769 | -12.7055 | -29.6640 | -11.8933 |
| 80 | -13.5807 | -2.9438  | -25.1830 | -7.7461  | -35.7039 | -13.5807 |
| 80 | -12.8395 | -8.2114  | -37.1248 | -11.3045 | -42.8457 | -12.8395 |
| 80 | -12.6798 | -16.3280 | -38.2686 | -10.4726 | -41.1080 | -12.6798 |

|    |          |          |          |          |          |          |
|----|----------|----------|----------|----------|----------|----------|
| 80 | -12.3440 | -6.4297  | -38.7004 | -10.3908 | -18.9840 | -12.3440 |
| 80 | -12.2792 | -16.9464 | -46.8010 | -10.1235 | -37.4462 | -12.2792 |
| 80 | -12.1758 | -6.1300  | -38.3413 | -7.8417  | -16.8723 | -12.1758 |
| 80 | -12.1220 | 54.1123  | -37.2876 | -7.8236  | 3.5829   | -12.1220 |
| 80 | -12.1200 | 0.6304   | -42.1236 | -8.7064  | -26.9395 | -12.1200 |
| 80 | -12.0274 | -8.2192  | -32.0882 | -9.6428  | -37.5808 | -12.0274 |
| 80 | -12.0254 | -12.6888 | -48.2743 | -12.7981 | -37.0943 | -12.0254 |
| 81 | -13.8635 | -0.9588  | -25.7723 | -8.4823  | -21.8148 | -13.8635 |
| 81 | -13.3440 | -19.4423 | -38.7022 | -8.3717  | -51.1949 | -13.3440 |
| 81 | -13.2104 | -9.4154  | -36.7844 | -9.8440  | -31.7950 | -13.2104 |
| 81 | -12.9909 | -14.5574 | -36.3770 | -7.3751  | -33.1154 | -12.9909 |
| 81 | -12.9057 | -20.0879 | -46.3741 | -12.7324 | -50.0250 | -12.9057 |
| 81 | -12.6703 | 5.7517   | -37.6269 | -9.9348  | -40.4023 | -12.6703 |
| 81 | -12.4983 | -8.4826  | -28.3721 | -6.8995  | -13.9851 | -12.4983 |
| 81 | -12.3620 | -13.3281 | -44.1061 | -10.5991 | -37.8319 | -12.3620 |
| 81 | -12.2562 | 13.0142  | -36.2380 | -7.2822  | 1.1568   | -12.2562 |
| 81 | -12.1909 | 1.5850   | -48.5786 | -9.2893  | -19.2153 | -12.1909 |
| 82 | -13.3763 | -11.2995 | -27.8871 | -7.0627  | -31.7551 | -13.3763 |
| 82 | -12.9238 | -11.9657 | -30.7983 | -6.4638  | -41.2247 | -12.9238 |
| 82 | -12.7450 | -11.6619 | -27.9851 | -7.9038  | -43.7151 | -12.7450 |
| 82 | -12.6822 | -19.3048 | -31.9379 | -8.8644  | -47.4579 | -12.6822 |
| 82 | -12.0889 | -13.4276 | -38.0894 | -8.9778  | -41.3184 | -12.0889 |
| 82 | -12.0323 | 89.3799  | -30.4810 | -7.1199  | 27.9690  | -12.0323 |
| 82 | -11.6772 | -4.4790  | -32.3876 | -9.2907  | -42.1362 | -11.6772 |
| 82 | -11.6658 | -9.6134  | -33.7373 | -7.7566  | -39.9283 | -11.6658 |
| 82 | -11.5773 | 8.0243   | -44.5695 | -7.9707  | -12.5444 | -11.5773 |
| 82 | -11.2818 | -21.0810 | -27.9960 | -7.6907  | -40.3111 | -11.2818 |
| 83 | -13.5041 | 1.8909   | -29.2747 | -8.8026  | -10.2890 | -13.5041 |
| 83 | -13.3887 | -5.3410  | -48.4571 | -9.9986  | -28.2679 | -13.3887 |
| 83 | -13.2746 | -2.6635  | -42.9937 | -10.2999 | -31.7051 | -13.2746 |
| 83 | -13.2689 | -3.2716  | -41.2662 | -12.3487 | -28.8410 | -13.2689 |
| 83 | -13.1639 | -15.4407 | -27.1616 | -11.2763 | -36.2101 | -13.1639 |
| 83 | -12.9995 | -12.4921 | -36.6920 | -9.4923  | -29.4996 | -12.9995 |
| 83 | -12.5798 | -20.9689 | -40.9530 | -9.9993  | -23.7916 | -12.5798 |
| 83 | -12.3839 | -18.7045 | -49.1671 | -13.8296 | -39.0576 | -12.3839 |
| 83 | -12.3249 | -5.0651  | -41.6906 | -12.0144 | -26.8852 | -12.3249 |
| 83 | -12.1410 | -9.6615  | -37.0586 | -10.4422 | -19.9166 | -12.1410 |
| 84 | -13.7292 | -43.5559 | -36.4758 | -10.7279 | -35.9567 | -13.7292 |
| 84 | -12.4794 | -42.7991 | -50.0231 | -12.2554 | -44.2433 | -12.4794 |
| 84 | -12.2209 | -46.8118 | -42.0033 | -9.0031  | -43.5279 | -12.2209 |
| 84 | -11.9696 | -40.1553 | -38.3872 | -9.2466  | -42.2933 | -11.9696 |
| 84 | -11.9297 | -49.3002 | -48.8397 | -8.9035  | -48.0797 | -11.9297 |
| 84 | -11.8177 | -42.7888 | -46.1511 | -11.0035 | -28.1249 | -11.8177 |
| 84 | -11.7754 | -35.2531 | -26.8742 | -10.6422 | -18.3834 | -11.7754 |
| 84 | -11.6475 | -36.0332 | -37.4634 | -8.5906  | -40.7431 | -11.6475 |
| 84 | -11.3862 | -30.1285 | -35.6603 | -9.5415  | -24.7191 | -11.3862 |



|    |          |          |          |          |          |          |
|----|----------|----------|----------|----------|----------|----------|
| 84 | -11.3612 | -25.1234 | -44.7449 | -10.8499 | -25.9267 | -11.3612 |
| 85 | -13.9937 | -37.1017 | -38.9227 | -9.2007  | -26.8317 | -13.9937 |
| 85 | -13.6675 | -47.0856 | -28.4074 | -9.7649  | -19.4134 | -13.6675 |
| 85 | -12.8726 | -39.8817 | -33.2359 | -9.2673  | -12.6688 | -12.8726 |
| 85 | -12.6802 | -48.6437 | -39.3814 | -11.9011 | -21.6797 | -12.6802 |
| 85 | -12.1771 | -24.3002 | -31.4457 | -10.0486 | -22.8425 | -12.1771 |
| 85 | -12.0712 | -48.3243 | -33.3138 | -7.8322  | -21.6805 | -12.0712 |
| 85 | -12.0576 | -49.5344 | -44.1639 | -11.8245 | -39.1487 | -12.0576 |
| 85 | -12.0073 | -42.6267 | -32.3827 | -9.2204  | -27.7584 | -12.0073 |
| 85 | -11.8975 | -45.9039 | -31.2898 | -8.6356  | -30.4558 | -11.8975 |
| 85 | -11.8289 | -37.0484 | -34.4369 | -10.3849 | -38.0292 | -11.8289 |
| 86 | -13.4674 | 12.9371  | -39.9251 | -9.9919  | -20.1446 | -13.4674 |
| 86 | -13.0039 | -6.6287  | -43.8492 | -11.0712 | -34.8960 | -13.0039 |
| 86 | -12.8396 | -6.2100  | -51.1604 | -10.2534 | -41.6212 | -12.8396 |
| 86 | -12.6036 | 0.6042   | -45.1440 | -13.0242 | -8.8051  | -12.6036 |
| 86 | -12.5198 | 7.2407   | -43.5730 | -11.3119 | -34.5468 | -12.5198 |
| 86 | -12.4805 | 11.1198  | -35.9104 | -11.1566 | -20.5348 | -12.4805 |
| 86 | -12.4163 | 10.2412  | -43.1777 | -9.5461  | -10.6918 | -12.4163 |
| 86 | -12.3050 | 6.9629   | -33.0746 | -9.6911  | -36.3442 | -12.3050 |
| 86 | -12.1339 | -0.3357  | -41.5631 | -8.6176  | -4.2349  | -12.1339 |
| 86 | -12.1212 | 23.1674  | -46.3229 | -9.8474  | -10.7022 | -12.1212 |
| 87 | -12.9954 | -4.0605  | -49.2907 | -11.5911 | -21.4262 | -12.9954 |
| 87 | -12.9733 | -2.2964  | -40.8098 | -10.1865 | -16.1659 | -12.9733 |
| 87 | -12.7482 | -8.7386  | -51.3103 | -12.5613 | -34.5428 | -12.7482 |
| 87 | -12.7213 | -11.8251 | -48.2523 | -11.3425 | -31.6242 | -12.7213 |
| 87 | -12.6088 | -5.0393  | -37.0931 | -9.6164  | -27.2284 | -12.6088 |
| 87 | -12.5390 | 7.0597   | -36.7786 | -8.5678  | -12.8320 | -12.5390 |
| 87 | -12.5003 | 21.2080  | -39.4921 | -9.5336  | -27.3395 | -12.5003 |
| 87 | -12.2936 | -1.8823  | -43.7573 | -8.8381  | -23.6493 | -12.2936 |
| 87 | -12.2008 | -8.4143  | -42.1121 | -11.8940 | -35.4405 | -12.2008 |
| 87 | -12.1806 | -3.5948  | -39.3524 | -10.5868 | -22.9031 | -12.1806 |
| 88 | -12.7342 | 5.8495   | -40.1297 | -9.6141  | -22.5045 | -12.7342 |
| 88 | -12.5622 | 68.0577  | -36.1308 | -8.6487  | -31.1004 | -12.5622 |
| 88 | -12.1604 | -14.7695 | -35.9630 | -10.3657 | -43.6620 | -12.1604 |
| 88 | -12.0852 | 7.8119   | -36.9324 | -9.7443  | -39.6953 | -12.0852 |
| 88 | -11.9696 | -8.6191  | -28.4365 | -10.5247 | -37.8635 | -11.9696 |
| 88 | -11.9201 | -7.7737  | -45.7793 | -9.2854  | -37.5770 | -11.9201 |
| 88 | -11.5748 | 19.8798  | -43.5620 | -8.9382  | -30.0991 | -11.5748 |
| 88 | -11.1686 | -14.1114 | -37.9269 | -8.6622  | -42.6069 | -11.1686 |
| 88 | -11.1375 | 15.9338  | -31.9512 | -11.0535 | -6.9461  | -11.1375 |
| 88 | -10.1629 | 33.4688  | -31.2268 | -8.6143  | 0.9080   | -10.1629 |
| 89 | -11.2663 | -19.5650 | -25.4088 | -11.1716 | -31.0858 | -11.2663 |
| 89 | -11.2613 | -23.5647 | -42.9328 | -12.8033 | -43.1894 | -11.2613 |
| 89 | -11.2119 | -9.4170  | -48.1790 | -12.1475 | -27.8597 | -11.2119 |
| 89 | -10.7179 | -7.5765  | -36.9239 | -13.3674 | -41.9690 | -10.7179 |
| 89 | -10.6897 | -22.5527 | -30.8005 | -12.2071 | -40.8529 | -10.6897 |

|    |          |          |          |          |          |          |
|----|----------|----------|----------|----------|----------|----------|
| 89 | -10.6641 | -16.2914 | -42.0831 | -13.1148 | -45.9563 | -10.6641 |
| 89 | -10.5300 | 6.7861   | -37.9527 | -11.8838 | -12.9789 | -10.5300 |
| 89 | -10.2582 | 0.4689   | -39.4858 | -11.5951 | -16.6348 | -10.2582 |
| 89 | -10.0778 | -11.2147 | -44.0639 | -14.5549 | -34.7081 | -10.0778 |
| 89 | -9.9028  | -2.4405  | -35.4604 | -12.0495 | -0.3214  | -9.9028  |
| 90 | -13.8590 | 13.1680  | -38.0706 | -10.2550 | -27.9050 | -13.8590 |
| 90 | -13.1791 | 8.9931   | -37.2911 | -14.0228 | -41.0536 | -13.1791 |
| 90 | -13.1683 | 80.5309  | -49.5756 | -13.9895 | -36.4972 | -13.1683 |
| 90 | -13.1632 | -0.5836  | -39.6205 | -9.5786  | -49.5375 | -13.1632 |
| 90 | -13.1429 | 8.5313   | -37.6738 | -10.2067 | -33.4056 | -13.1429 |
| 90 | -12.8594 | 47.4779  | -38.4251 | -12.0024 | 7.5140   | -12.8594 |
| 90 | -12.6800 | 3.2718   | -34.7189 | -9.7617  | -40.6281 | -12.6800 |
| 90 | -12.6717 | 1.0736   | -64.0310 | -16.4241 | -44.2712 | -12.6717 |
| 90 | -12.5353 | 6.0032   | -44.2606 | -13.0404 | -49.4581 | -12.5353 |
| 90 | -12.3582 | 1.1166   | -49.6893 | -12.3235 | -49.7518 | -12.3582 |
| 91 | -13.3454 | 9.9835   | -30.9117 | -10.1492 | -29.3657 | -13.3454 |
| 91 | -13.1630 | 6.7998   | -48.2559 | -14.4090 | -33.1569 | -13.1630 |
| 91 | -12.9596 | 1.3747   | -27.2621 | -11.7099 | -42.8474 | -12.9596 |
| 91 | -12.7923 | 14.5641  | -44.7034 | -12.1732 | -32.7024 | -12.7923 |
| 91 | -12.7810 | 0.1678   | -43.2299 | -11.6169 | -46.2483 | -12.7810 |
| 91 | -12.5531 | 1.3355   | -37.7158 | -10.4195 | -44.0535 | -12.5531 |
| 91 | -12.4248 | 8.7583   | -35.7176 | -10.8665 | -31.8071 | -12.4248 |
| 91 | -12.3177 | 6.0665   | -28.2569 | -11.9020 | -39.8519 | -12.3177 |
| 91 | -11.9176 | 13.7163  | -39.0770 | -13.0110 | -39.9833 | -11.9176 |
| 91 | -11.7936 | 19.8411  | -21.1634 | -11.9447 | -14.2891 | -11.7936 |
| 92 | -13.0542 | 13.4183  | -36.3850 | -12.4458 | -17.5246 | -13.0542 |
| 92 | -13.0233 | 12.2847  | -37.9384 | -12.1429 | -26.6823 | -13.0233 |
| 92 | -12.6971 | 20.8813  | -34.0421 | -11.0487 | -28.3829 | -12.6971 |
| 92 | -12.5321 | 0.4878   | -42.7410 | -12.7845 | -36.2890 | -12.5321 |
| 92 | -12.3533 | 4.8483   | -37.0533 | -11.5794 | -33.6788 | -12.3533 |
| 92 | -12.3520 | 3.3256   | -31.9319 | -11.0824 | -39.4432 | -12.3520 |
| 92 | -12.2147 | 2.7955   | -50.3960 | -13.1704 | -34.1562 | -12.2147 |
| 92 | -12.1991 | 9.8715   | -37.9514 | -14.9525 | -15.9127 | -12.1991 |
| 92 | -12.1954 | 21.5887  | -34.3911 | -12.3635 | -22.7578 | -12.1954 |
| 92 | -12.1244 | 12.8165  | -30.1254 | -15.3613 | -36.1771 | -12.1244 |
| 93 | -13.2111 | 4.8886   | -43.3855 | -11.2262 | -20.5617 | -13.2111 |
| 93 | -13.1524 | -8.2416  | -41.0684 | -14.4546 | -23.9217 | -13.1524 |
| 93 | -12.8903 | -15.9776 | -42.4820 | -8.4368  | -40.4906 | -12.8903 |
| 93 | -12.8487 | -11.1363 | -26.3779 | -9.3881  | -31.9574 | -12.8487 |
| 93 | -12.8018 | -7.3385  | -57.2448 | -15.1656 | -36.3498 | -12.8018 |
| 93 | -12.6979 | -16.9454 | -29.0977 | -8.3558  | -49.7025 | -12.6979 |
| 93 | -12.6234 | 11.1479  | -34.8955 | -8.3154  | -27.8868 | -12.6234 |
| 93 | -12.4812 | -0.4833  | -46.2384 | -11.1240 | -33.2299 | -12.4812 |
| 93 | -12.4605 | 2.1008   | -35.7131 | -8.9620  | -21.5447 | -12.4605 |
| 93 | -12.4348 | -14.7429 | -37.8944 | -11.4776 | -42.6508 | -12.4348 |
| 94 | -14.7354 | -1.0279  | -32.3593 | -14.5450 | -33.8984 | -14.7354 |

|    |          |          |          |          |          |          |
|----|----------|----------|----------|----------|----------|----------|
| 94 | -14.0562 | -5.2422  | -42.2528 | -12.7699 | -38.1726 | -14.0562 |
| 94 | -13.2998 | 6.8338   | -43.0476 | -11.0767 | -30.9423 | -13.2998 |
| 94 | -13.2900 | 50.3850  | -25.6118 | -10.4848 | -5.6198  | -13.2900 |
| 94 | -13.2433 | -1.2567  | -41.7737 | -14.3898 | -39.5145 | -13.2433 |
| 94 | -13.1513 | 16.5591  | -40.5401 | -9.5555  | -4.3337  | -13.1513 |
| 94 | -12.9513 | 10.0144  | -29.1608 | -9.4250  | -33.8971 | -12.9513 |
| 94 | -12.7658 | -0.9663  | -37.9641 | -10.2871 | -44.1351 | -12.7658 |
| 94 | -12.1620 | 0.4050   | -25.9777 | -8.6356  | -18.4207 | -12.1620 |
| 94 | -12.0182 | -2.4422  | -45.8407 | -11.0095 | -29.6805 | -12.0182 |
| 95 | -12.3766 | -12.1972 | -51.2275 | -17.6383 | -34.0699 | -12.3766 |
| 95 | -11.8799 | -9.9223  | -27.5891 | -7.7444  | -49.4120 | -11.8799 |
| 95 | -11.8656 | -14.4250 | -35.3432 | -9.1372  | -33.3051 | -11.8656 |
| 95 | -11.8068 | -10.0160 | -40.7283 | -10.3029 | -39.7951 | -11.8068 |
| 95 | -11.6522 | -9.1207  | -52.8089 | -12.1215 | -30.0574 | -11.6522 |
| 95 | -11.5235 | -15.4745 | -38.7375 | -10.3189 | -47.0297 | -11.5235 |
| 95 | -11.4101 | -11.8624 | -41.8945 | -9.0792  | -37.4561 | -11.4101 |
| 95 | -11.1561 | -5.8247  | -34.9782 | -9.8621  | -23.7122 | -11.1561 |
| 95 | -11.1332 | 2.0815   | -34.5314 | -8.7344  | -16.2902 | -11.1332 |
| 95 | -10.9658 | -12.6013 | -23.0802 | -7.6482  | -30.4575 | -10.9658 |
| 96 | -14.6195 | -0.8405  | -37.3090 | -6.3603  | -22.8470 | -14.6195 |
| 96 | -14.0935 | 4.1846   | -41.0414 | -8.6213  | -34.7579 | -14.0935 |
| 96 | -13.3558 | 4.4736   | -37.5415 | -9.2392  | -46.7056 | -13.3558 |
| 96 | -13.2010 | 2.0624   | -33.4244 | -6.5634  | -40.1751 | -13.2010 |
| 96 | -13.0038 | 1.9770   | -39.0518 | -7.6848  | -31.0678 | -13.0038 |
| 96 | -12.9538 | 15.9759  | -42.9145 | -9.0495  | -20.3619 | -12.9538 |
| 96 | -12.9372 | 10.8657  | -40.3189 | -9.7336  | -16.1621 | -12.9372 |
| 96 | -12.8614 | -7.4547  | -41.0380 | -10.7541 | -33.5752 | -12.8614 |
| 96 | -12.8274 | 23.7866  | -48.8104 | -11.1061 | 0.7036   | -12.8274 |
| 96 | -12.6846 | 84.7454  | -44.0955 | -10.3136 | -23.7683 | -12.6846 |
| 97 | -13.3304 | -24.5703 | -49.0163 | -11.0230 | -30.8610 | -13.3304 |
| 97 | -13.1635 | -20.0867 | -37.7952 | -9.8732  | -28.3674 | -13.1635 |
| 97 | -12.8602 | -25.4620 | -38.7572 | -9.8146  | -39.0184 | -12.8602 |
| 97 | -12.7921 | -17.9071 | -41.4749 | -12.1254 | -31.8300 | -12.7921 |
| 97 | -12.7398 | -25.4656 | -43.9066 | -12.2088 | -29.7967 | -12.7398 |
| 97 | -12.6935 | -21.8543 | -40.8358 | -10.1121 | -39.5953 | -12.6935 |
| 97 | -12.4111 | -22.7470 | -45.4096 | -11.0269 | -6.1895  | -12.4111 |
| 97 | -12.3330 | -27.4712 | -47.0457 | -9.9912  | -46.6368 | -12.3330 |
| 97 | -12.2227 | -18.9319 | -49.1407 | -13.3323 | -34.1142 | -12.2227 |
| 97 | -12.1864 | -16.1442 | -41.2943 | -9.1904  | -34.5707 | -12.1864 |
| 98 | -13.4227 | -17.5114 | -40.4191 | -9.3156  | -36.4300 | -13.4227 |
| 98 | -13.2230 | -19.9317 | -33.6085 | -9.8399  | -35.2011 | -13.2230 |
| 98 | -12.8312 | -20.1104 | -46.0131 | -11.0959 | -40.9733 | -12.8312 |
| 98 | -12.5762 | -14.6197 | -46.8107 | -11.8351 | -33.8089 | -12.5762 |
| 98 | -12.5660 | -7.9760  | -56.1773 | -13.5254 | -37.1161 | -12.5660 |
| 98 | -12.5300 | -24.2390 | -37.9830 | -12.2539 | -48.1097 | -12.5300 |
| 98 | -11.9017 | -21.3340 | -32.4216 | -9.5874  | -46.0007 | -11.9017 |

|     |          |          |          |          |          |          |
|-----|----------|----------|----------|----------|----------|----------|
| 98  | -10.9865 | 5.9273   | -42.1137 | -9.9681  | -13.9880 | -10.9865 |
| 98  | -10.8688 | -16.8738 | -34.3212 | -9.9346  | -38.2974 | -10.8688 |
| 98  | -10.7222 | -19.2029 | -40.2702 | -10.3189 | -39.6409 | -10.7222 |
| 99  | -14.1808 | -15.6865 | -51.9739 | -14.5404 | -37.5294 | -14.1808 |
| 99  | -13.3362 | -11.9272 | -48.8634 | -14.3463 | -1.9061  | -13.3362 |
| 99  | -13.2625 | -13.6035 | -37.0675 | -11.5392 | -38.7433 | -13.2625 |
| 99  | -12.5848 | 4.9486   | -41.5335 | -12.8515 | 0.8082   | -12.5848 |
| 99  | -12.4844 | -16.9982 | -41.8407 | -11.9458 | -19.3008 | -12.4844 |
| 99  | -12.2211 | -12.8482 | -31.5898 | -9.8695  | -28.4952 | -12.2211 |
| 99  | -12.0000 | -11.6801 | -42.8295 | -9.9208  | -27.0926 | -12.0000 |
| 99  | -11.7579 | -15.8025 | -28.3239 | -8.6243  | -6.8642  | -11.7579 |
| 99  | -11.6953 | -20.3853 | -45.8889 | -8.6606  | -27.7201 | -11.6953 |
| 99  | -11.4940 | -9.8924  | -37.9150 | -9.3780  | -9.9677  | -11.4940 |
| 100 | -13.7395 | -23.0151 | -34.7119 | -12.0881 | -22.1072 | -13.7395 |
| 100 | -13.1641 | -28.4244 | -39.2442 | -10.2343 | -21.8913 | -13.1641 |
| 100 | -13.1256 | -39.4389 | -34.6059 | -9.8571  | -34.8704 | -13.1256 |
| 100 | -12.5709 | -36.8977 | -48.2958 | -13.7595 | -38.6504 | -12.5709 |
| 100 | -12.5023 | -46.5177 | -44.8318 | -10.6950 | -40.1470 | -12.5023 |
| 100 | -12.2203 | -52.8602 | -31.1938 | -9.9321  | -47.2122 | -12.2203 |
| 100 | -12.0710 | -41.2436 | -34.0261 | -9.5133  | -35.8714 | -12.0710 |
| 100 | -12.0382 | -43.7804 | -35.6730 | -11.4595 | -13.6700 | -12.0382 |
| 100 | -11.9937 | -39.9087 | -32.4278 | -12.3799 | -39.4459 | -11.9937 |
| 100 | -11.2824 | -39.9517 | -40.4745 | -9.6173  | -11.6118 | -11.2824 |
| 101 | -13.3825 | -37.2189 | -31.0806 | -14.5262 | -38.6110 | -13.3825 |
| 101 | -13.2907 | -38.7707 | -29.4022 | -9.5721  | -38.1629 | -13.2907 |
| 101 | -13.1736 | -34.6124 | -40.0989 | -11.9855 | -37.9284 | -13.1736 |
| 101 | -12.9531 | -30.0726 | -37.8847 | -8.5912  | -34.8291 | -12.9531 |
| 101 | -12.3782 | -35.1537 | -44.1844 | -11.3348 | -38.6330 | -12.3782 |
| 101 | -12.3331 | -39.9221 | -46.1734 | -9.4938  | -47.9343 | -12.3331 |
| 101 | -11.9863 | -5.9200  | -32.2947 | -10.3757 | -21.5055 | -11.9863 |
| 101 | -11.9631 | -15.9066 | -38.6443 | -11.6264 | -38.1876 | -11.9631 |
| 101 | -11.8252 | -35.3674 | -30.3239 | -9.3134  | -28.7323 | -11.8252 |
| 101 | -11.7870 | -32.8359 | -42.1618 | -10.4219 | -44.3118 | -11.7870 |
| 102 | -13.9996 | -36.7640 | -30.5189 | -8.8516  | -40.3827 | -13.9996 |
| 102 | -13.0901 | -28.8061 | -41.7748 | -9.6394  | -42.1042 | -13.0901 |
| 102 | -13.0091 | -34.6618 | -31.2806 | -12.9475 | -40.4160 | -13.0091 |
| 102 | -12.8506 | -29.6797 | -32.4309 | -10.1556 | -42.0117 | -12.8506 |
| 102 | -12.3459 | -37.1109 | -47.9727 | -14.3032 | -20.5489 | -12.3459 |
| 102 | -12.1038 | -27.7561 | -32.8162 | -8.8914  | -14.9359 | -12.1038 |
| 102 | -12.0589 | -25.3789 | -37.0422 | -9.9461  | -24.7876 | -12.0589 |
| 102 | -12.0402 | -21.8883 | -40.9404 | -9.3810  | -14.4076 | -12.0402 |
| 102 | -12.0375 | -35.2435 | -37.3068 | -9.0291  | -33.1743 | -12.0375 |
| 102 | -11.6383 | -39.9270 | -46.4264 | -10.6671 | -20.1731 | -11.6383 |
| 103 | -13.9227 | 61.9473  | -36.7259 | -14.0740 | -34.3617 | -13.9227 |
| 103 | -13.4717 | 71.4960  | -41.5629 | -10.5234 | -33.6952 | -13.4717 |
| 103 | -13.1443 | 84.3240  | -36.3993 | -11.4807 | -41.3370 | -13.1443 |

|     |          |          |          |          |          |          |
|-----|----------|----------|----------|----------|----------|----------|
| 103 | -13.1089 | 69.3533  | -41.2107 | -10.1049 | -29.3865 | -13.1089 |
| 103 | -13.0656 | 94.8442  | -39.1437 | -10.5228 | 4.4025   | -13.0656 |
| 103 | -13.0345 | 68.6549  | -47.7202 | -11.6415 | -25.8877 | -13.0345 |
| 103 | -13.0237 | 70.8886  | -50.9413 | -15.2267 | -15.9869 | -13.0237 |
| 103 | -13.0026 | 65.7438  | -53.9544 | -13.7864 | -15.9103 | -13.0026 |
| 103 | -12.8744 | 59.6733  | -24.4681 | -10.1935 | -49.8896 | -12.8744 |
| 103 | -12.6055 | 71.7170  | -44.2729 | -9.9470  | -6.9944  | -12.6055 |
| 104 | -13.2724 | 19.5220  | -39.9818 | -6.5987  | -49.4039 | -13.2724 |
| 104 | -13.1122 | 21.5552  | -39.1112 | -5.6352  | -28.1167 | -13.1122 |
| 104 | -13.1041 | 22.8839  | -37.1550 | -9.4690  | -29.9720 | -13.1041 |
| 104 | -13.0803 | 33.8209  | -38.4192 | -8.9328  | -12.2988 | -13.0803 |
| 104 | -12.9031 | 20.4442  | -46.5151 | -13.8524 | -25.7183 | -12.9031 |
| 104 | -12.8882 | 31.8225  | -31.9359 | -5.8592  | -7.2517  | -12.8882 |
| 104 | -12.4466 | 19.6747  | -38.3936 | -8.4242  | -25.6282 | -12.4466 |
| 104 | -12.1980 | 32.7334  | -30.4606 | -5.9682  | -22.8145 | -12.1980 |
| 104 | -12.1112 | 25.1185  | -31.6749 | -6.2887  | -28.6773 | -12.1112 |
| 104 | -11.8779 | 28.2488  | -33.3980 | -6.0777  | -21.9809 | -11.8779 |
| 105 | -13.2919 | -26.3136 | -29.3754 | -10.0072 | -34.1212 | -13.2919 |
| 105 | -13.1857 | -24.1791 | -31.7074 | -8.1089  | -40.4823 | -13.1857 |
| 105 | -12.7027 | -18.4323 | -41.9287 | -11.5208 | -36.6389 | -12.7027 |
| 105 | -12.2611 | -9.3337  | -34.3203 | -8.9552  | -22.6323 | -12.2611 |
| 105 | -11.9169 | -29.0456 | -43.3516 | -8.5363  | -42.9096 | -11.9169 |
| 105 | -11.9161 | -19.0928 | -41.7480 | -11.8161 | -32.5323 | -11.9161 |
| 105 | -11.8276 | 0.4808   | -38.1390 | -12.8112 | -1.2999  | -11.8276 |
| 105 | -11.6509 | -19.1721 | -42.9286 | -13.0212 | -15.4250 | -11.6509 |
| 105 | -11.5686 | -4.1587  | -31.7187 | -8.0392  | -26.6310 | -11.5686 |
| 105 | -11.5016 | -5.3967  | -45.9726 | -8.7194  | 5.8071   | -11.5016 |
| 106 | -12.8380 | -31.3624 | -39.3547 | -8.3808  | -36.8283 | -12.8380 |
| 106 | -12.6549 | -32.0140 | -43.9789 | -8.6597  | -34.1170 | -12.6549 |
| 106 | -12.0849 | -35.5942 | -36.1921 | -9.2492  | -31.7051 | -12.0849 |
| 106 | -11.8003 | -32.0328 | -31.7923 | -8.9200  | -37.4884 | -11.8003 |
| 106 | -11.5836 | -25.4816 | -42.5848 | -8.6374  | -34.3041 | -11.5836 |
| 106 | -10.8650 | -24.8079 | -34.0322 | -8.5941  | -3.0885  | -10.8650 |
| 106 | -10.7710 | 1.0294   | -27.8828 | -10.1598 | -14.1422 | -10.7710 |
| 106 | -10.7505 | -15.8679 | -46.1101 | -12.4416 | -24.9690 | -10.7505 |
| 106 | -10.5953 | -27.4131 | -39.3755 | -11.4717 | -12.4948 | -10.5953 |
| 106 | -10.4992 | -12.8825 | -37.0383 | -7.9968  | -15.4262 | -10.4992 |
| 107 | -13.6560 | -19.8593 | -39.0524 | -8.5377  | -34.9460 | -13.6560 |
| 107 | -13.3772 | -11.7068 | -36.4815 | -9.6916  | -36.2841 | -13.3772 |
| 107 | -13.0635 | -16.9323 | -35.6122 | -7.2690  | -43.3134 | -13.0635 |
| 107 | -12.7387 | -3.1966  | -44.0839 | -10.4600 | -21.2817 | -12.7387 |
| 107 | -12.4258 | -17.2141 | -39.7807 | -6.3906  | -43.2329 | -12.4258 |
| 107 | -12.3761 | 5.3447   | -38.1959 | -7.9616  | -19.7997 | -12.3761 |
| 107 | -11.8839 | -8.8793  | -30.7997 | -6.3548  | -33.6431 | -11.8839 |
| 107 | -11.8830 | -20.4228 | -48.6990 | -9.8811  | -39.5900 | -11.8830 |
| 107 | -11.7609 | 19.4223  | -32.0701 | -7.3757  | -35.5953 | -11.7609 |

|     |          |          |          |          |          |          |
|-----|----------|----------|----------|----------|----------|----------|
| 107 | -11.2813 | 5.4342   | -38.0325 | -8.4482  | 13.9282  | -11.2813 |
| 108 | -14.2532 | -6.5554  | -32.7844 | -7.7837  | -39.5474 | -14.2532 |
| 108 | -13.2128 | -2.3095  | -38.0058 | -6.9601  | -35.0498 | -13.2128 |
| 108 | -13.1052 | -18.0063 | -41.1221 | -8.8349  | -54.4797 | -13.1052 |
| 108 | -13.1012 | -14.8590 | -40.1797 | -5.8418  | -45.1053 | -13.1012 |
| 108 | -12.8433 | -19.2143 | -36.5176 | -6.6693  | -45.3297 | -12.8433 |
| 108 | -12.8241 | -11.5783 | -51.4954 | -11.5156 | -48.2989 | -12.8241 |
| 108 | -12.5439 | -17.6870 | -31.0016 | -7.1412  | -32.5006 | -12.5439 |
| 108 | -12.4551 | 9.6269   | -44.3344 | -8.7019  | -21.2275 | -12.4551 |
| 108 | -11.9461 | -8.4717  | -28.0856 | -7.4854  | -51.6835 | -11.9461 |
| 108 | -11.7638 | 37.1281  | -21.3482 | -7.0689  | 15.1441  | -11.7638 |
| 109 | -13.6486 | -15.8015 | -38.3429 | -9.7004  | -34.1549 | -13.6486 |
| 109 | -13.1803 | -19.3264 | -38.0090 | -9.6534  | -47.5871 | -13.1803 |
| 109 | -12.4202 | -16.3452 | -37.0547 | -10.1882 | -32.0035 | -12.4202 |
| 109 | -12.3547 | -17.4839 | -50.4476 | -12.6722 | -46.0893 | -12.3547 |
| 109 | -12.3148 | -16.4322 | -37.3541 | -9.2936  | -47.6331 | -12.3148 |
| 109 | -12.1717 | -8.2175  | -50.9096 | -14.4905 | -35.8276 | -12.1717 |
| 109 | -12.1344 | -16.2296 | -34.7105 | -8.7344  | -25.2731 | -12.1344 |
| 109 | -12.0240 | -15.7676 | -42.4748 | -11.6449 | -25.7179 | -12.0240 |
| 109 | -11.9406 | -8.4269  | -33.4581 | -8.8052  | -44.3456 | -11.9406 |
| 109 | -11.9282 | -9.9562  | -32.8257 | -9.6981  | -39.7703 | -11.9282 |
| 110 | -13.6251 | -16.5257 | -36.8799 | -7.2498  | -49.8227 | -13.6251 |
| 110 | -13.3715 | -14.1777 | -39.9236 | -12.9280 | -42.3020 | -13.3715 |
| 110 | -13.3419 | -21.0900 | -33.0154 | -10.6558 | -46.0461 | -13.3419 |
| 110 | -13.3095 | -20.5705 | -30.2201 | -7.0429  | -45.6255 | -13.3095 |
| 110 | -13.1535 | -5.9211  | -39.0711 | -6.8718  | -43.0037 | -13.1535 |
| 110 | -13.0845 | -19.8865 | -41.2342 | -8.1642  | -36.3238 | -13.0845 |
| 110 | -13.0420 | -10.1343 | -40.8746 | -7.9904  | -24.1019 | -13.0420 |
| 110 | -12.8191 | -18.8791 | -43.5433 | -10.3859 | -34.9438 | -12.8191 |
| 110 | -12.5993 | -5.3241  | -25.3167 | -9.5287  | -28.4308 | -12.5993 |
| 110 | -12.3990 | -18.5326 | -26.1022 | -9.0165  | -32.8311 | -12.3990 |
| 111 | -13.8409 | -43.1323 | -46.8640 | -15.1132 | -32.6597 | -13.8409 |
| 111 | -12.9402 | -45.9776 | -42.0135 | -9.7253  | -32.8162 | -12.9402 |
| 111 | -12.7890 | -45.1864 | -39.3825 | -8.4628  | -50.8492 | -12.7890 |
| 111 | -12.7423 | -48.2903 | -38.4855 | -7.9859  | -51.1652 | -12.7423 |
| 111 | -12.0338 | -36.0260 | -26.8280 | -8.1676  | -48.6688 | -12.0338 |
| 111 | -11.7969 | -37.9090 | -31.3148 | -11.8390 | -36.4672 | -11.7969 |
| 111 | -11.6041 | -26.7128 | -32.9927 | -8.8547  | -29.5818 | -11.6041 |
| 111 | -11.4976 | -42.4848 | -50.0180 | -12.4750 | -33.0035 | -11.4976 |
| 111 | -11.2706 | -35.8504 | -49.9056 | -12.2222 | -37.2042 | -11.2706 |
| 111 | -10.8648 | -42.8687 | -35.6526 | -8.2007  | -41.5713 | -10.8648 |

**Table S7.** Ten top scored docking positioning of the SIRT2 inhibitors **112-116** at the 4RMG PDB code (MOE software). The predicted  $\Delta G$  value of each protein-ligand complex has been reported, as calculated in terms of final scoring function (S, as Kcal/mol).

| Compound | S       | E_conf  | E_place  | E_score1 | E_refine | E_score2 |
|----------|---------|---------|----------|----------|----------|----------|
| 112      | -5.3404 | 59.8378 | -16.3372 | -8.6437  | -26.4935 | -5.3404  |
| 112      | -5.3265 | 61.6343 | -18.8272 | -8.2548  | -28.2900 | -5.3265  |
| 112      | -5.3083 | 60.0833 | -20.3968 | -8.6529  | -29.6896 | -5.3083  |
| 112      | -5.2745 | 63.1445 | -21.8302 | -8.2616  | -27.0410 | -5.2745  |
| 112      | -5.2461 | 61.5283 | -23.3147 | -8.4870  | -28.8639 | -5.2461  |
| 112      | -5.2074 | 62.8579 | -20.4852 | -8.3638  | -28.0144 | -5.2074  |
| 112      | -5.1784 | 56.8209 | -18.8881 | -8.7044  | -25.9658 | -5.1784  |
| 112      | -5.0579 | 57.1992 | -18.6478 | -8.3481  | -26.9594 | -5.0579  |
| 112      | -4.9180 | 61.9024 | -19.2827 | -8.4992  | -29.0794 | -4.9180  |
| 112      | -4.7806 | 60.1270 | -19.1407 | -8.4167  | -24.3645 | -4.7806  |
| 113      | -6.3165 | 44.2262 | -15.2498 | -8.5265  | -31.4510 | -6.3165  |
| 113      | -5.4965 | 38.3458 | -16.9127 | -7.9596  | -28.8435 | -5.4965  |
| 113      | -5.2981 | 39.7475 | -16.5890 | -8.1990  | -27.5821 | -5.2981  |
| 113      | -5.1898 | 42.3413 | -15.6630 | -8.0201  | -25.2773 | -5.1898  |
| 113      | -5.1765 | 40.3803 | -16.6091 | -8.3596  | -28.0338 | -5.1765  |
| 113      | -5.1283 | 36.8748 | -18.1882 | -8.3079  | -26.4272 | -5.1283  |
| 113      | -5.1130 | 39.1993 | -18.4080 | -8.6236  | -29.9559 | -5.1130  |
| 113      | -5.1074 | 40.9832 | -19.3570 | -8.2924  | -28.2961 | -5.1074  |
| 113      | -5.0882 | 39.4675 | -17.5327 | -8.1827  | -27.2754 | -5.0882  |
| 113      | -4.8356 | 39.0311 | -17.2206 | -7.9864  | -28.2777 | -4.8356  |
| 114      | -7.6047 | 56.1428 | -19.8853 | -8.4233  | -32.8524 | -7.6047  |
| 114      | -7.5091 | 53.3907 | -24.5982 | -8.2436  | -35.7618 | -7.5091  |
| 114      | -7.2908 | 48.8385 | -19.2412 | -8.2456  | -33.5995 | -7.2908  |
| 114      | -7.2465 | 60.1492 | -19.9816 | -8.9000  | -35.4482 | -7.2465  |
| 114      | -7.0725 | 54.4772 | -22.4791 | -9.8409  | -32.5215 | -7.0725  |
| 114      | -7.0702 | 52.3370 | -26.0485 | -9.5573  | -28.7765 | -7.0702  |
| 114      | -7.0329 | 58.9761 | -24.8942 | -8.3054  | -1.6790  | -7.0329  |
| 114      | -6.7586 | 52.4518 | -29.2516 | -8.3379  | -27.2222 | -6.7586  |
| 114      | -6.7520 | 49.1823 | -17.1326 | -8.4774  | -25.2842 | -6.7520  |
| 114      | -6.7231 | 50.2336 | -24.7436 | -8.4636  | -32.5501 | -6.7231  |
| 115      | -8.1909 | 56.1645 | -24.7630 | -8.9699  | -32.9392 | -8.1909  |
| 115      | -8.0161 | 47.2657 | -24.2299 | -9.4777  | -36.1067 | -8.0161  |
| 115      | -7.9050 | 49.7090 | -20.4748 | -10.7569 | -34.0771 | -7.9050  |
| 115      | -7.8454 | 46.6672 | -21.5455 | -8.8880  | -32.5392 | -7.8454  |
| 115      | -7.7931 | 42.1018 | -22.5821 | -8.7167  | -34.2423 | -7.7931  |
| 115      | -7.6376 | 45.2911 | -28.3659 | -9.0910  | -34.4934 | -7.6376  |
| 115      | -7.5658 | 43.7207 | -26.5945 | -9.5005  | -35.2860 | -7.5658  |
| 115      | -7.3632 | 48.1657 | -22.4882 | -8.8172  | -30.9688 | -7.3632  |
| 115      | -7.3009 | 43.1822 | -27.0364 | -10.0190 | -30.9944 | -7.3009  |
| 115      | -7.2491 | 48.6016 | -22.4063 | -9.5644  | -25.4465 | -7.2491  |
| 116      | -7.2539 | 46.7363 | -19.6167 | -9.5343  | -36.4286 | -7.2539  |
| 116      | -7.1088 | 42.0126 | -29.5901 | -9.4017  | -32.8432 | -7.1088  |
| 116      | -6.7788 | 43.3001 | -17.9842 | -9.1838  | -25.6907 | -6.7788  |
| 116      | -6.7039 | 37.7617 | -20.8041 | -9.9379  | -33.4346 | -6.7039  |
| 116      | -6.6723 | 41.8600 | -18.2389 | -9.2197  | -31.6015 | -6.6723  |

|            |         |         |          |          |          |         |
|------------|---------|---------|----------|----------|----------|---------|
| <b>116</b> | -6.6704 | 40.0015 | -23.4932 | -10.2214 | -35.0815 | -6.6704 |
| <b>116</b> | -6.6428 | 37.6876 | -21.8879 | -9.4988  | -35.0622 | -6.6428 |
| <b>116</b> | -6.4847 | 40.2980 | -24.3624 | -10.4979 | -28.6348 | -6.4847 |
| <b>116</b> | -6.4783 | 39.2429 | -26.3302 | -9.7845  | -33.8369 | -6.4783 |
| <b>116</b> | -6.4019 | 41.5733 | -23.6571 | -9.9247  | -29.7559 | -6.4019 |

**Table S8.** Ten top scored docking positioning of the SIRT2 inhibitors **112-116** at the 5MAT PDB code (MOE software). The predicted  $\Delta G$  value of each protein-ligand complex has been reported, as calculated in terms of final scoring function (S, as Kcal/mol).

| <b>Compound</b> | <b>S</b> | <b>E_conf</b> | <b>E_place</b> | <b>E_score1</b> | <b>E_refine</b> | <b>E_score2</b> |
|-----------------|----------|---------------|----------------|-----------------|-----------------|-----------------|
| <b>112</b>      | -5.4023  | 58.0304       | -24.6803       | -9.0243         | -31.3765        | -5.4023         |
| <b>112</b>      | -5.3284  | 58.0911       | -29.9347       | -8.9925         | -28.4771        | -5.3284         |
| <b>112</b>      | -5.2932  | 57.3992       | -21.7561       | -9.7625         | -30.7691        | -5.2932         |
| <b>112</b>      | -5.0898  | 60.5048       | -21.2533       | -9.1751         | -20.4286        | -5.0898         |
| <b>112</b>      | -5.0898  | 56.9218       | -24.3986       | -10.3952        | -22.9202        | -5.0898         |
| <b>112</b>      | -5.0698  | 58.6302       | -21.6301       | -9.1057         | -27.5706        | -5.0698         |
| <b>112</b>      | -4.9684  | 58.6663       | -26.4878       | -9.4748         | -27.9082        | -4.9684         |
| <b>112</b>      | -4.7547  | 61.2353       | -21.2899       | -8.9922         | -23.9356        | -4.7547         |
| <b>112</b>      | -4.7182  | 57.3022       | -24.1629       | -10.3518        | -23.2956        | -4.7182         |
| <b>112</b>      | -4.7069  | 57.8997       | -23.2594       | -9.5909         | -24.2361        | -4.7069         |
| <b>113</b>      | -5.9011  | 42.4399       | -21.5776       | -9.2598         | -28.3076        | -5.9011         |
| <b>113</b>      | -5.6987  | 39.7731       | -20.0498       | -9.5829         | -25.0967        | -5.6987         |
| <b>113</b>      | -5.5278  | 44.2905       | -19.7953       | -9.1534         | -32.5271        | -5.5278         |
| <b>113</b>      | -5.3895  | 37.7410       | -20.5915       | -9.9990         | -24.5152        | -5.3895         |
| <b>113</b>      | -5.3248  | 36.2321       | -27.8934       | -9.1819         | -31.0722        | -5.3248         |
| <b>113</b>      | -5.3060  | 39.8297       | -18.1193       | -10.0368        | -14.2443        | -5.3060         |
| <b>113</b>      | -5.1056  | 36.2650       | -28.8735       | -9.1303         | -30.1118        | -5.1056         |
| <b>113</b>      | -5.0768  | 35.2090       | -25.7017       | -9.7220         | -24.0103        | -5.0768         |
| <b>113</b>      | -5.0683  | 37.6896       | -20.6784       | -10.5521        | -24.9659        | -5.0683         |
| <b>113</b>      | -5.0535  | 37.3638       | -18.6594       | -9.2848         | -30.8609        | -5.0535         |
| <b>114</b>      | -7.5841  | 54.1520       | -35.8740       | -10.0868        | -36.3495        | -7.5841         |
| <b>114</b>      | -7.4988  | 49.1339       | -23.6264       | -10.5368        | -34.0066        | -7.4988         |
| <b>114</b>      | -7.2571  | 56.0720       | -27.0842       | -9.4126         | -26.3210        | -7.2571         |
| <b>114</b>      | -6.9616  | 49.7687       | -27.4455       | -10.4168        | -22.8566        | -6.9616         |
| <b>114</b>      | -6.9084  | 48.9685       | -25.7429       | -9.7629         | -26.6270        | -6.9084         |
| <b>114</b>      | -6.8979  | 49.6057       | -28.9360       | -13.0813        | -28.1924        | -6.8979         |
| <b>114</b>      | -6.8454  | 49.5683       | -29.4569       | -9.7046         | -36.0863        | -6.8454         |
| <b>114</b>      | -6.8243  | 50.9265       | -31.4947       | -9.6330         | -34.2884        | -6.8243         |
| <b>114</b>      | -6.7689  | 52.3632       | -31.4140       | -9.4984         | -31.5505        | -6.7689         |
| <b>114</b>      | -6.7566  | 58.4894       | -25.4328       | -9.3952         | -21.7167        | -6.7566         |
| <b>115</b>      | -8.9498  | 50.2785       | -34.2241       | -9.7881         | -24.0972        | -8.9498         |
| <b>115</b>      | -8.7633  | 43.5833       | -34.4952       | -10.8327        | -26.8257        | -8.7633         |
| <b>115</b>      | -8.4265  | 56.7462       | -25.5619       | -10.7349        | -9.5371         | -8.4265         |



|     |         |         |          |          |          |         |
|-----|---------|---------|----------|----------|----------|---------|
| 115 | -7.9018 | 48.0603 | -34.2411 | -9.4160  | -28.8188 | -7.9018 |
| 115 | -7.7322 | 60.0283 | -29.8330 | -10.0257 | -13.0355 | -7.7322 |
| 115 | -7.7089 | 44.9534 | -35.7338 | -9.3509  | -31.4795 | -7.7089 |
| 115 | -7.6974 | 47.9193 | -38.3521 | -9.2723  | -36.8062 | -7.6974 |
| 115 | -7.3669 | 43.7385 | -23.4590 | -9.8761  | -29.2321 | -7.3669 |
| 115 | -7.2136 | 45.6139 | -28.2125 | -9.5690  | -28.4975 | -7.2136 |
| 115 | -7.1958 | 44.1212 | -40.2594 | -9.4507  | -37.3636 | -7.1958 |
| 116 | -7.8486 | 44.7246 | -30.2459 | -11.5293 | -23.6337 | -7.8486 |
| 116 | -7.8246 | 40.9332 | -33.7298 | -11.7900 | -27.2326 | -7.8246 |
| 116 | -7.5013 | 50.5289 | -28.8678 | -10.3889 | -8.3230  | -7.5013 |
| 116 | -7.3001 | 40.2446 | -28.6276 | -10.7942 | -26.2434 | -7.3001 |
| 116 | -7.0524 | 39.7383 | -32.6974 | -10.2507 | -22.8952 | -7.0524 |
| 116 | -7.0260 | 43.3439 | -33.3518 | -10.2843 | -29.9638 | -7.0260 |
| 116 | -6.9430 | 43.6470 | -30.9061 | -10.1495 | -38.6868 | -6.9430 |
| 116 | -6.8599 | 44.5372 | -28.3784 | -11.2958 | -30.0644 | -6.8599 |
| 116 | -6.7727 | 39.4847 | -27.2874 | -10.8823 | -24.1711 | -6.7727 |
| 116 | -6.6726 | 46.7541 | -28.0513 | -10.6129 | -23.5490 | -6.6726 |

**Table S9.** Rigid protein Virtual screening. Ten top scored docking positioning of the novel identified SIRT2 inhibitors **1a-7a** at the 4RMG PDB code (MOE software). The SIRT2 inhibitor AGK2 has been also considered as reference compound. The predicted  $\Delta G$  value of each protein-ligand complex has been reported, as calculated in terms of final scoring function (S, as Kcal/mol).

| Compound | S        | E_conf  | E_place  | E_score1 | E_refine | E_score2 |
|----------|----------|---------|----------|----------|----------|----------|
| 1a       | -9.4004  | 34.2832 | -26.4484 | -8.8771  | -7.4778  | -9.4004  |
| 1a       | -9.0980  | 39.6262 | -23.6360 | -10.5270 | -14.8229 | -9.0980  |
| 1a       | -8.9235  | 37.4397 | -19.8001 | -8.5350  | -16.4555 | -8.9235  |
| 1a       | -8.7738  | 46.7376 | -25.1603 | -8.8724  | 0.3711   | -8.7738  |
| 1a       | -8.2850  | 38.8720 | -20.8246 | -8.6022  | -21.8182 | -8.2850  |
| 1a       | -8.0325  | 28.0057 | -21.1364 | -9.2539  | -25.5420 | -8.0325  |
| 1a       | -8.0218  | 26.5764 | -26.4965 | -9.4738  | -26.9227 | -8.0218  |
| 1a       | -7.9091  | 28.2035 | -19.0495 | -8.5543  | -26.2193 | -7.9091  |
| 1a       | -7.8140  | 27.2928 | -23.5073 | -8.8179  | -19.9696 | -7.8140  |
| 1a       | -7.7192  | 44.5577 | -26.3606 | -8.3942  | -15.0075 | -7.7192  |
| 2a       | -10.0158 | 33.7044 | -28.5256 | -8.9755  | -4.1568  | -10.0158 |
| 2a       | -10.0043 | 47.1255 | -26.2476 | -8.9433  | 2.5064   | -10.0043 |
| 2a       | -9.9162  | 69.4167 | -17.9713 | -8.7402  | 23.6811  | -9.9162  |
| 2a       | -9.7029  | 31.5735 | -21.8140 | -8.1540  | -15.1579 | -9.7029  |
| 2a       | -9.2695  | 31.8094 | -23.5908 | -8.3551  | -3.6524  | -9.2695  |
| 2a       | -8.9896  | 22.3920 | -23.9999 | -9.0055  | -21.4666 | -8.9896  |
| 2a       | -8.8657  | 34.1510 | -17.8360 | -7.9587  | -9.5086  | -8.8657  |
| 2a       | -8.7431  | 27.0064 | -16.2796 | -8.1977  | -23.0232 | -8.7431  |
| 2a       | -8.6515  | 31.1323 | -14.2086 | -8.8127  | -13.8846 | -8.6515  |
| 2a       | -8.5009  | 37.6623 | -19.3668 | -8.1114  | -11.6729 | -8.5009  |

|    |          |          |          |          |          |          |
|----|----------|----------|----------|----------|----------|----------|
| 3a | -9.4095  | 13.5647  | -26.2863 | -10.8934 | -4.9516  | -9.4095  |
| 3a | -9.3214  | 11.9038  | -20.8187 | -8.5315  | -8.9750  | -9.3214  |
| 3a | -9.2346  | 12.7771  | -21.7444 | -8.5093  | -12.6848 | -9.2346  |
| 3a | -9.1770  | 16.1019  | -18.6855 | -9.4505  | -10.3090 | -9.1770  |
| 3a | -9.0238  | 18.5116  | -26.9030 | -10.0900 | 0.3880   | -9.0238  |
| 3a | -8.9911  | 16.6799  | -19.2242 | -8.7453  | -22.7360 | -8.9911  |
| 3a | -8.9487  | 20.5321  | -17.3321 | -8.6670  | 14.3788  | -8.9487  |
| 3a | -8.8221  | 27.8127  | -20.2365 | -9.8340  | 16.7268  | -8.8221  |
| 3a | -8.3943  | 22.0333  | -21.6604 | -8.8903  | -6.6167  | -8.3943  |
| 3a | -8.2425  | 7.9952   | -23.9063 | -8.6930  | -25.1096 | -8.2425  |
| 4a | -8.9714  | 1.8032   | -20.7065 | -7.9314  | -7.7120  | -8.9714  |
| 4a | -8.8710  | 11.6294  | -21.3511 | -9.6427  | -11.4867 | -8.8710  |
| 4a | -8.7651  | 11.6405  | -29.4715 | -9.8587  | -15.2393 | -8.7651  |
| 4a | -8.3924  | 48.8920  | -15.6768 | -8.5757  | 39.5095  | -8.3924  |
| 4a | -8.2901  | 7.0567   | -20.5867 | -8.0299  | -11.5678 | -8.2901  |
| 4a | -8.1999  | 20.3162  | -25.8684 | -11.0583 | 53.5885  | -8.1999  |
| 4a | -8.1857  | 0.5710   | -22.8665 | -9.3643  | -26.9827 | -8.1857  |
| 4a | -7.8969  | 12.1843  | -26.1390 | -9.0207  | -13.4661 | -7.8969  |
| 4a | -7.8297  | 17.5383  | -28.9195 | -8.2356  | -9.4861  | -7.8297  |
| 4a | -7.7045  | 27.0419  | -13.6158 | -8.4785  | 0.8708   | -7.7045  |
| 5a | -9.0509  | -5.3699  | -19.7405 | -9.5322  | -14.4267 | -9.0509  |
| 5a | -8.7092  | -11.3884 | -14.5392 | -10.3442 | -11.5082 | -8.7092  |
| 5a | -8.5754  | -3.5155  | -22.0600 | -8.7457  | -4.9687  | -8.5754  |
| 5a | -8.3696  | -10.0206 | -32.3261 | -8.8055  | -23.6363 | -8.3696  |
| 5a | -8.2574  | -4.8716  | -25.9557 | -10.7752 | -9.6070  | -8.2574  |
| 5a | -8.0120  | -23.1228 | -25.9350 | -8.3756  | -23.5931 | -8.0120  |
| 5a | -7.8355  | 10.0989  | -24.5592 | -10.1955 | 17.2742  | -7.8355  |
| 5a | -7.8120  | 2.1871   | -24.3836 | -8.5911  | 7.2494   | -7.8120  |
| 5a | -7.7134  | -11.9154 | -19.3414 | -10.2077 | -17.1831 | -7.7134  |
| 5a | -7.6351  | 30.3790  | -22.1878 | -8.4060  | 42.9440  | -7.6351  |
| 6a | -10.2478 | 7.8728   | -21.8975 | -10.1859 | 3.6999   | -10.2478 |
| 6a | -9.8349  | 7.8143   | -30.6188 | -9.4173  | 4.1768   | -9.8349  |
| 6a | -9.8206  | 0.2044   | -25.9691 | -10.3372 | -24.0262 | -9.8206  |
| 6a | -9.8161  | 13.4661  | -28.7141 | -11.9312 | -10.1151 | -9.8161  |
| 6a | -9.7389  | 10.8004  | -22.6697 | -10.0088 | -11.3049 | -9.7389  |
| 6a | -9.7264  | 11.0218  | -26.8641 | -8.5777  | -14.7350 | -9.7264  |
| 6a | -9.5483  | 17.2348  | -17.3659 | -8.6805  | 7.1432   | -9.5483  |
| 6a | -9.4567  | 8.2724   | -26.6179 | -9.3536  | -19.4069 | -9.4567  |
| 6a | -9.2866  | -1.4136  | -22.5072 | -9.9414  | -20.6150 | -9.2866  |
| 6a | -9.1944  | 9.2750   | -17.4803 | -8.3166  | -8.3928  | -9.1944  |
| 7a | -10.7072 | 61.5467  | -23.1041 | -8.5819  | -8.9134  | -10.7072 |
| 7a | -10.6169 | 75.2277  | -20.0870 | -8.6678  | 5.8752   | -10.6169 |
| 7a | -10.6089 | 58.8829  | -20.4931 | -9.5911  | -4.9472  | -10.6089 |
| 7a | -10.5852 | 43.2278  | -22.9289 | -8.6362  | -3.6911  | -10.5852 |
| 7a | -10.5111 | 55.2774  | -18.9151 | -9.5828  | 0.5999   | -10.5111 |
| 7a | -10.4843 | 44.5222  | -21.0537 | -8.8491  | -3.4183  | -10.4843 |

|             |          |         |          |         |         |          |
|-------------|----------|---------|----------|---------|---------|----------|
| <b>7a</b>   | -10.3800 | 44.4986 | -21.2328 | -8.9472 | -3.9157 | -10.3800 |
| <b>7a</b>   | -10.3766 | 53.8000 | -20.9551 | -8.8092 | 8.2720  | -10.3766 |
| <b>7a</b>   | -10.3617 | 58.3304 | -27.6435 | -9.3668 | 4.5437  | -10.3617 |
| <b>7a</b>   | -10.1839 | 43.9191 | -26.2669 | -9.1892 | -7.1624 | -10.1839 |
| <b>AGK2</b> | -12.3545 | 43.1796 | -27.9120 | -7.9005 | -1.2242 | -12.3545 |

**Table S10.** Rigid protein Virtual screening. Ten top scored docking positioning of the novel identified SIRT2 inhibitors **1a-7a** at the 5MAT PDB code (MOE software). The SIRT2 inhibitor AGK2 has been also considered as reference compound. The predicted  $\Delta G$  value of each protein-ligand complex has been reported, as calculated in terms of final scoring function (S, as Kcal/mol).

| Compound  | S       | E_conf  | E_place  | E_score1 | E_refine | E_score2 |
|-----------|---------|---------|----------|----------|----------|----------|
| <b>1a</b> | -8.5706 | 39.7190 | -31.6267 | -9.1109  | -17.4603 | -8.5706  |
| <b>1a</b> | -8.2475 | 29.7915 | -27.8109 | -8.2177  | -12.4591 | -8.2475  |
| <b>1a</b> | -8.0268 | 42.9923 | -29.6301 | -8.1718  | -0.9737  | -8.0268  |
| <b>1a</b> | -7.9812 | 34.1350 | -35.0882 | -10.5088 | 4.1888   | -7.9812  |
| <b>1a</b> | -7.9694 | 29.8000 | -26.6836 | -8.2964  | 1.4244   | -7.9694  |
| <b>1a</b> | -7.7901 | 30.0656 | -20.3196 | -9.3502  | -10.5859 | -7.7901  |
| <b>1a</b> | -7.6679 | 38.4283 | -18.6014 | -8.0613  | -1.0470  | -7.6679  |
| <b>1a</b> | -7.6545 | 34.4443 | -20.4333 | -9.0135  | -12.1696 | -7.6545  |
| <b>1a</b> | -7.6514 | 32.4146 | -26.3872 | -9.4187  | 5.6106   | -7.6514  |
| <b>1a</b> | -7.6252 | 35.6247 | -28.3564 | -12.4230 | -5.9837  | -7.6252  |
| <b>2a</b> | -9.4364 | 35.2733 | -35.3793 | -8.6924  | 3.9134   | -9.4364  |
| <b>2a</b> | -9.4276 | 27.6578 | -35.4135 | -8.1682  | -12.1070 | -9.4276  |
| <b>2a</b> | -9.2711 | 31.7483 | -25.4143 | -8.1453  | -20.1741 | -9.2711  |
| <b>2a</b> | -9.2337 | 48.8123 | -26.4006 | -9.0498  | 11.0988  | -9.2337  |
| <b>2a</b> | -9.0424 | 36.7183 | -36.0633 | -10.4274 | -5.8903  | -9.0424  |
| <b>2a</b> | -8.9952 | 46.9316 | -35.4645 | -9.2158  | -2.0447  | -8.9952  |
| <b>2a</b> | -8.9628 | 43.4355 | -26.3714 | -8.1427  | 14.3257  | -8.9628  |
| <b>2a</b> | -8.9233 | 33.1059 | -35.0816 | -9.2701  | 1.3757   | -8.9233  |
| <b>2a</b> | -8.6349 | 42.3913 | -32.4158 | -8.5784  | -4.2029  | -8.6349  |
| <b>2a</b> | -8.5070 | 54.7463 | -33.5414 | -8.4096  | 32.2391  | -8.5070  |
| <b>3a</b> | -8.8986 | 14.2885 | -21.5164 | -9.8610  | 4.9477   | -8.8986  |
| <b>3a</b> | -8.8334 | 17.8821 | -29.8018 | -9.9412  | 29.0717  | -8.8334  |
| <b>3a</b> | -8.4582 | 23.4765 | -33.4347 | -9.2954  | 15.3096  | -8.4582  |
| <b>3a</b> | -8.4518 | 9.6196  | -29.1194 | -9.4483  | -6.3696  | -8.4518  |
| <b>3a</b> | -8.3834 | 13.0392 | -30.4483 | -9.8047  | -3.0555  | -8.3834  |
| <b>3a</b> | -8.3659 | 15.7303 | -34.8093 | -9.8573  | -3.2631  | -8.3659  |
| <b>3a</b> | -8.3309 | 14.0364 | -32.2264 | -9.7231  | -14.8324 | -8.3309  |
| <b>3a</b> | -8.3302 | 18.8577 | -32.4724 | -10.4734 | -18.3485 | -8.3302  |
| <b>3a</b> | -8.0978 | 19.3630 | -35.6233 | -9.8700  | -17.9022 | -8.0978  |
| <b>3a</b> | -7.9813 | 20.6845 | -36.2188 | -9.7647  | -7.8962  | -7.9813  |
| <b>4a</b> | -9.7765 | 8.9145  | -28.6109 | -10.2765 | -18.7757 | -9.7765  |
| <b>4a</b> | -9.7092 | 13.1769 | -33.3017 | -9.6286  | -12.7891 | -9.7092  |
| <b>4a</b> | -9.4539 | 17.1454 | -36.0267 | -11.4404 | 27.1018  | -9.4539  |
| <b>4a</b> | -9.1791 | 4.3688  | -31.1896 | -10.4415 | -16.5454 | -9.1791  |

|      |          |          |          |          |          |          |
|------|----------|----------|----------|----------|----------|----------|
| 4a   | -9.1107  | 11.1215  | -40.8968 | -9.9579  | -17.2215 | -9.1107  |
| 4a   | -9.0711  | 12.7261  | -30.8175 | -10.3442 | -14.2492 | -9.0711  |
| 4a   | -8.9619  | 21.3356  | -29.3996 | -9.7596  | 17.6367  | -8.9619  |
| 4a   | -8.9590  | 5.4430   | -33.1400 | -10.6194 | -3.1835  | -8.9590  |
| 4a   | -8.7561  | 5.7262   | -28.7116 | -10.8634 | -14.9002 | -8.7561  |
| 4a   | -8.5978  | 5.0440   | -25.7699 | -9.8994  | -8.2443  | -8.5978  |
| 5a   | -9.9680  | -13.4394 | -26.9203 | -9.0680  | -20.1495 | -9.9680  |
| 5a   | -9.8936  | -9.2862  | -34.5184 | -8.7033  | -10.2397 | -9.8936  |
| 5a   | -9.4852  | -11.6869 | -33.0015 | -10.6444 | -19.3875 | -9.4852  |
| 5a   | -9.3342  | -11.0063 | -25.1340 | -9.4906  | -16.7457 | -9.3342  |
| 5a   | -9.2818  | -6.4384  | -30.3503 | -8.8831  | -12.4089 | -9.2818  |
| 5a   | -9.2224  | -10.6289 | -27.7229 | -11.8456 | -10.7057 | -9.2224  |
| 5a   | -9.0125  | -8.9704  | -27.9633 | -9.2092  | 1.7897   | -9.0125  |
| 5a   | -8.9629  | -3.1532  | -29.7299 | -9.6717  | 17.6341  | -8.9629  |
| 5a   | -8.8553  | -17.9331 | -24.4935 | -10.0497 | -13.4442 | -8.8553  |
| 5a   | -8.5990  | 17.7923  | -27.9206 | -11.3114 | 66.8918  | -8.5990  |
| 6a   | -10.9884 | 10.8527  | -39.5053 | -10.7373 | -16.0098 | -10.9884 |
| 6a   | -10.8360 | 3.7936   | -30.9982 | -10.7509 | -14.6279 | -10.8360 |
| 6a   | -10.7763 | 24.2042  | -32.5021 | -9.7274  | 27.5252  | -10.7763 |
| 6a   | -10.6794 | 8.1983   | -27.2891 | -10.0424 | -5.1963  | -10.6794 |
| 6a   | -10.5061 | 10.6062  | -29.3086 | -11.2600 | -11.8971 | -10.5061 |
| 6a   | -10.4118 | 13.6811  | -35.3761 | -11.0359 | -11.4316 | -10.4118 |
| 6a   | -9.7078  | 9.6792   | -30.7673 | -9.6506  | 2.2642   | -9.7078  |
| 6a   | -9.5490  | 19.0121  | -33.4839 | -9.7753  | 44.5090  | -9.5490  |
| 6a   | -9.5220  | 28.8933  | -35.4535 | -10.1640 | 6.9597   | -9.5220  |
| 6a   | -9.2936  | 23.3174  | -25.7204 | -9.6846  | 12.8830  | -9.2936  |
| 7a   | -9.9227  | 54.2778  | -34.6917 | -10.7258 | 3.1148   | -9.9227  |
| 7a   | -9.5259  | 55.9304  | -25.8540 | -8.9765  | 11.5004  | -9.5259  |
| 7a   | -9.4850  | 53.3920  | -37.1103 | -8.7369  | 4.6319   | -9.4850  |
| 7a   | -9.4821  | 66.4844  | -29.7207 | -9.1317  | 25.4970  | -9.4821  |
| 7a   | -9.3514  | 71.9428  | -31.3255 | -8.4030  | 2.5715   | -9.3514  |
| 7a   | -9.1916  | 54.6667  | -27.3826 | -9.1572  | 12.3761  | -9.1916  |
| 7a   | -9.1491  | 64.0590  | -32.5278 | -8.3140  | 1.9188   | -9.1491  |
| 7a   | -9.1452  | 69.7133  | -27.9359 | -10.4305 | 61.2354  | -9.1452  |
| 7a   | -9.0220  | 72.5005  | -33.1113 | -8.4135  | 2.6576   | -9.0220  |
| 7a   | -8.6434  | 67.3448  | -22.7825 | -8.3873  | 27.7506  | -8.6434  |
| AGK2 | -11.7728 | 62.7179  | -28.1687 | -7.6774  | 40.1252  | -11.7728 |

**Table S11.** Flexible protein Virtual screening. Five top scored docking positioning of the novel identified SIRT2 inhibitors **1a-7a** at the 4RMG PDB code (MOE software). The SIRT2 inhibitor AGK2 has been also considered as reference compound. The predicted  $\Delta G$  value of each protein-ligand complex has been reported, as calculated in terms of final scoring function (S, as Kcal/mol).

| Compound | S        | E_conf   | E_place  | E_score1 | E_refine | E_score2 |
|----------|----------|----------|----------|----------|----------|----------|
| 1a       | -9.5617  | 30.1341  | -24.8953 | -10.5752 | -19.1446 | -9.5617  |
| 1a       | -9.5488  | 29.3902  | -27.6763 | -9.1281  | -19.0177 | -9.5488  |
| 1a       | -9.4884  | 30.6250  | -23.8048 | -8.3081  | -19.0965 | -9.4884  |
| 1a       | -8.6303  | 35.2950  | -27.9394 | -8.3756  | -18.3631 | -8.6303  |
| 1a       | -8.4510  | 36.3321  | -26.9235 | -8.5330  | -23.6778 | -8.4510  |
| 2a       | -10.5439 | 25.8577  | -24.2694 | -8.2227  | -3.8073  | -10.5439 |
| 2a       | -10.3583 | 38.9237  | -25.5446 | -8.0893  | -2.8473  | -10.3583 |
| 2a       | -10.3562 | 38.3786  | -28.0415 | -8.5344  | -17.9208 | -10.3562 |
| 2a       | -10.3326 | 44.1909  | -18.3727 | -8.3089  | -0.7735  | -10.3326 |
| 2a       | -10.1423 | 31.8108  | -28.2591 | -10.5753 | 15.9216  | -10.1423 |
| 3a       | -9.5571  | 8.7658   | -26.6166 | -9.8003  | -13.9148 | -9.5571  |
| 3a       | -9.4864  | 14.3085  | -26.5698 | -9.8797  | -13.9755 | -9.4864  |
| 3a       | -9.4290  | 8.0651   | -22.8752 | -8.8471  | -19.1138 | -9.4290  |
| 3a       | -9.2953  | 17.4309  | -25.9498 | -8.8664  | -21.3621 | -9.2953  |
| 3a       | -9.2666  | 13.5796  | -16.8761 | -8.8021  | -24.3819 | -9.2666  |
| 4a       | -9.4795  | 12.7061  | -25.8140 | -9.0960  | -13.9820 | -9.4795  |
| 4a       | -9.3082  | 9.7623   | -21.8115 | -8.9848  | -13.0469 | -9.3082  |
| 4a       | -9.2204  | 9.5686   | -13.0012 | -10.4389 | -5.5669  | -9.2204  |
| 4a       | -9.0953  | 19.4831  | -24.8256 | -8.7022  | -18.3639 | -9.0953  |
| 4a       | -8.9591  | 8.0038   | -24.6987 | -8.6367  | -12.7982 | -8.9591  |
| 5a       | -9.8703  | -14.6966 | -24.8607 | -9.8611  | -1.1262  | -9.8703  |
| 5a       | -9.1115  | -9.5073  | -24.4054 | -10.5811 | -20.8337 | -9.1115  |
| 5a       | -8.9825  | -11.2181 | -18.8741 | -9.7312  | -21.6268 | -8.9825  |
| 5a       | -8.4246  | -20.7734 | -24.6435 | -8.7084  | -7.7907  | -8.4246  |
| 5a       | -8.2710  | -8.8776  | -26.1773 | -9.3543  | -13.5277 | -8.2710  |
| 6a       | -10.3828 | 13.7101  | -26.5277 | -9.7503  | -20.0673 | -10.3828 |
| 6a       | -10.3184 | 15.6072  | -28.9513 | -10.3406 | -3.2860  | -10.3184 |
| 6a       | -10.2685 | 11.6418  | -20.3297 | -8.6215  | -22.0868 | -10.2685 |
| 6a       | -10.0371 | 10.4418  | -30.7654 | -9.9595  | -23.8399 | -10.0371 |
| 6a       | -9.8793  | 8.3028   | -27.7035 | -8.8663  | -19.4066 | -9.8793  |
| 7a       | -10.9785 | 56.5435  | -17.8592 | -8.8760  | -8.7181  | -10.9785 |
| 7a       | -10.6662 | 57.6456  | -22.3537 | -10.9067 | -20.4469 | -10.6662 |
| 7a       | -10.6378 | 52.9520  | -31.1625 | -10.4170 | -17.9076 | -10.6378 |
| 7a       | -10.5375 | 47.8347  | -20.8423 | -9.3579  | -11.9879 | -10.5375 |
| 7a       | -10.2985 | 53.1118  | -26.2195 | -10.1949 | -6.5685  | -10.2985 |
| AGK2     | -11.5559 | 43.7486  | -25.3648 | -8.7591  | 12.0598  | -11.5559 |

**Table S12.** Flexible protein Virtual screening. Five top scored docking positioning of the novel identified SIRT2 inhibitors **1a-7a** at the 5MAT PDB code (MOE software). The SIRT2 inhibitor AGK2 has been also considered as reference compound. The predicted  $\Delta G$  value of each protein-ligand complex has been reported, as calculated in terms of final scoring function (S, as Kcal/mol).

| mseq | S        | E_conf   | E_place  | E_score1 | E_refine | E_score2 |
|------|----------|----------|----------|----------|----------|----------|
| 1a   | -8.5504  | 35.8090  | -27.4786 | -9.3227  | -23.9326 | -8.5504  |
| 1a   | -8.0335  | 41.8086  | -25.0820 | -9.1672  | 10.4411  | -8.0335  |
| 1a   | -8.0008  | 38.8853  | -35.6432 | -10.6364 | -16.4839 | -8.0008  |
| 1a   | -7.4592  | 33.5926  | -25.0119 | -9.2003  | -23.2686 | -7.4592  |
| 1a   | -7.4078  | 26.0521  | -28.1108 | -11.1153 | -15.4990 | -7.4078  |
| 2a   | -9.2688  | 34.1839  | -31.3363 | -9.5055  | -13.4631 | -9.2688  |
| 2a   | -9.2660  | 33.1133  | -37.1513 | -9.7663  | -17.8508 | -9.2660  |
| 2a   | -9.1151  | 44.0130  | -37.4914 | -9.8515  | -12.3586 | -9.1151  |
| 2a   | -9.0434  | 30.5912  | -36.5789 | -11.0853 | -28.2654 | -9.0434  |
| 2a   | -8.9878  | 25.2055  | -33.9332 | -10.2823 | -12.3852 | -8.9878  |
| 3a   | -8.7362  | 9.0098   | -29.7506 | -9.6353  | -20.9744 | -8.7362  |
| 3a   | -8.5721  | 11.6969  | -32.7220 | -10.0383 | -21.4420 | -8.5721  |
| 3a   | -8.3286  | 18.8645  | -34.1676 | -10.0219 | -7.1967  | -8.3286  |
| 3a   | -8.2745  | 16.7642  | -21.2420 | -10.0014 | 10.4518  | -8.2745  |
| 3a   | -7.9579  | 15.2782  | -30.4212 | -9.3204  | -23.0374 | -7.9579  |
| 4a   | -11.4785 | 11.4543  | -34.4188 | -11.2323 | -17.4558 | -11.4785 |
| 4a   | -9.2090  | 6.0519   | -44.9981 | -12.8925 | -25.0428 | -9.2090  |
| 4a   | -9.1721  | 2.5929   | -28.8207 | -10.7807 | -17.6604 | -9.1721  |
| 4a   | -8.9668  | 6.5661   | -26.4576 | -10.5660 | -19.8077 | -8.9668  |
| 4a   | -8.6980  | 4.8363   | -36.4894 | -10.3089 | -23.3939 | -8.6980  |
| 5a   | -9.3488  | -16.3453 | -36.5596 | -10.9406 | -26.6234 | -9.3488  |
| 5a   | -8.3594  | -9.6579  | -30.5816 | -10.6039 | -14.0273 | -8.3594  |
| 5a   | -8.3582  | -17.5326 | -31.7400 | -12.9923 | -23.3486 | -8.3582  |
| 5a   | -7.7948  | -18.6275 | -21.7908 | -10.0312 | -14.3554 | -7.7948  |
| 5a   | -7.7711  | -19.1781 | -25.8513 | -10.2661 | -16.3643 | -7.7711  |
| 6a   | -10.3401 | 6.2178   | -40.5129 | -10.4845 | -21.7718 | -10.3401 |
| 6a   | -9.4694  | 9.7539   | -29.7817 | -11.2655 | -8.4563  | -9.4694  |
| 6a   | -9.2092  | 10.4676  | -30.5862 | -10.1482 | 2.5850   | -9.2092  |
| 6a   | -9.0809  | 3.4790   | -25.3108 | -9.6256  | -16.1220 | -9.0809  |
| 6a   | -8.8716  | 3.3537   | -34.1313 | -11.6179 | -14.0789 | -8.8716  |
| 7a   | -10.3930 | 71.2262  | -34.2017 | -10.5311 | 14.9904  | -10.3930 |
| 7a   | -10.0579 | 47.7010  | -35.7014 | -10.1342 | -17.5108 | -10.0579 |
| 7a   | -9.9081  | 50.9382  | -35.1110 | -9.0981  | -8.4001  | -9.9081  |
| 7a   | -9.8345  | 70.1906  | -30.3143 | -9.7857  | 12.3281  | -9.8345  |
| 7a   | -9.8066  | 49.0991  | -31.0803 | -9.2944  | -12.4422 | -9.8066  |
| AGK2 | -11.3868 | 38.5745  | -23.2340 | -8.2233  | -3.2912  | -11.3868 |

**Table S13.** Calculated properties based on the Lipinski's and Veber's rules as referred to the novel SIRT2 inhibitors **1a-7a** and to the reference compounds AGK2, SirReal2. Reliability index values for a number of descriptors are shown as R.I. (values higher than 0.30 are ranked as reliable by the software).

| Comp.            | MW <sup>a</sup> | N. H-bond acceptor <sup>b</sup> | N. H-bond donor <sup>c</sup> | N. rotatable bonds <sup>d</sup> | cLogP<br>GALAS <sup>e</sup><br>(R.I. ≥ 0.46) | TPSA <sup>f</sup> | HIA (%) <sup>g</sup> | Vd (l/kg) <sup>h</sup> | %PPB <sup>i</sup><br>(R.I. ≥ 0.34) | LogK <sub>1HSA</sub> <sup>l</sup><br>(R.I. ≥ 0.34) | %F (oral) <sup>m</sup><br>50mg |
|------------------|-----------------|---------------------------------|------------------------------|---------------------------------|----------------------------------------------|-------------------|----------------------|------------------------|------------------------------------|----------------------------------------------------|--------------------------------|
| <b>1a</b>        | 355.50          | 3                               | 1                            | 4                               | 4.99                                         | 119.59            | 100                  | 4.3                    | 99.59                              | 4.91                                               | 83.9                           |
| <b>2a</b>        | 360.93          | 2                               | 1                            | 5                               | 5.88                                         | 78.65             | 100                  | 4.8                    | 99.69                              | 5.07                                               | 64.3                           |
| <b>3a</b>        | 332.87          | 2                               | 1                            | 4                               | 5.40                                         | 78.46             | 100                  | 3.8                    | 99.69                              | 5.05                                               | 67.1                           |
| <b>4a</b>        | 353.46          | 4                               | 2                            | 4                               | 4.06                                         | 107.56            | 100                  | 2.3                    | 99.13                              | 4.42                                               | 96.5                           |
| <b>5a</b>        | 371.50          | 4                               | 2                            | 4                               | 4.17                                         | 132.86            | 100                  | 0.69                   | 99.55                              | 4.60                                               | 90.0                           |
| <b>6a</b>        | 407.43          | 4                               | 2                            | 5                               | 4.32                                         | 107.65            | 100                  | 2.7                    | 99.71                              | 4.77                                               | 81.4                           |
| <b>7a (YM08)</b> | 367.49          | 4                               | 0                            | 2                               | 3.14                                         | 87.04             | 100                  | 2.2                    | 98.07                              | 4.73                                               | 98.5                           |
| <b>AGK2</b>      | 434.27          | 5                               | 1                            | 5                               | 4.85                                         | 78.92             | 100                  | 3.1                    | 99.93                              | 5.15                                               | 13.9                           |
| <b>SirReal 2</b> | 420.55          | 5                               | 1                            | 6                               | 4.99                                         | 121.31            | 100                  | 2.5                    | 98.71                              | 4.69                                               | 21.9                           |

a Molecular weight; b Number of H-bond acceptors; c Number of H-bond donors; d Number of rotatable bonds; e Logarithmic ratio of the octanol–water partitioning coefficient; f Topological polar surface area; g HIA represents the human intestinal absorption, expressed as percentage of the molecule able to pass through the intestinal membrane; h prediction of Volume of Distribution (Vd) of the compound in the body; i percentage of plasmatic protein bound drug; l Ligand affinity toward human serum albumin (HSA); m Percentage oral bioavailability.

**Table S14.** Calculated ADMET descriptors concerning the novel SIRT2 inhibitors **1a-7a** and the reference compounds AGK2, SirReal2 (n.d.; not determined). Reliability index values for a number of descriptors are shown as R.I. (values higher than 0.30 are ranked as reliable by the software).

| Comp.             | CYP3A4 <sup>a</sup>                                    |                           | LD <sub>50</sub> (mg/kg) <sup>b</sup><br>Mouse oral (R.I. ≥ 0.3 ) | PAINS<br>(Pan Assay Interference structures) |
|-------------------|--------------------------------------------------------|---------------------------|-------------------------------------------------------------------|----------------------------------------------|
|                   | Inhibitor<br>(IC <sub>50</sub> < 10mM)<br>(R.I. ≥ 0.3) | Substrate<br>(R.I. ≥ 0.3) |                                                                   |                                              |
| <b>1a</b>         | 0.06                                                   | 0.84                      | 800                                                               | 0 ALERT                                      |
| <b>2a</b>         | 0.08                                                   | 0.86                      | 730                                                               | 0 ALERT                                      |
| <b>3a</b>         | 0.08                                                   | 0.87                      | n.d.                                                              | 0 ALERT                                      |
| <b>4a</b>         | 0.07                                                   | 0.88                      | n.d.                                                              | 0 ALERT                                      |
| <b>5a</b>         | 0.03                                                   | 0.87                      | n.d.                                                              | 0 ALERT                                      |
| <b>6a</b>         | 0.10                                                   | 0.90                      | n.d.                                                              | 0 ALERT                                      |
| <b>7a (YM-08)</b> | 0.16                                                   | 0.93                      | 360                                                               | 0 ALERT                                      |
| <b>AGK2</b>       | 0.45                                                   | 0.95                      | 900                                                               | 0 ALERT                                      |
| <b>SirReal2</b>   | 0.89                                                   | 0.97                      | 1100                                                              | 0 ALERT                                      |

a Prediction of the ligand inhibitor/substrate behavior towards cytochrome CYP3A4; b Acute toxicity (LD<sub>50</sub>) for mouse after oral administration
